# Supplementary material for: Negative cell cycle regulation by calcineurin is necessary for proper beta cell regeneration in zebrafish
Source: eLife. 2024 Oct 9;12:RP88813. doi: 10.7554/eLife.88813 (PMC11464004; doi:10.7554/eLife.88813)
Supplement: Supplementary file 1. [file elife-88813-supp1.xlsx]

## Sheet: Table_Ablation_Ductal
ID	gene	baseMean	log2FoldChange	padj	Ductal_baseMean	MTZ_baseMean
ENSDARG00000104635	mhc2b	800.268	5.95693	1.61295e-30	16.3501	1584.19
ENSDARG00000068621	si:ch211-181d7.3	739.376	8.24491	7.04111e-23	1.25063	1477.5
ENSDARG00000078069	rrm2	869.046	4.26949	3.30167e-22	70.2394	1667.85
ENSDARG00000056473	chaf1b	416.421	4.18554	3.47083e-21	35.8645	796.977
ENSDARG00000078113	atp5mea	917.702	3.75274	4.09227e-21	110.261	1725.14
ENSDARG00000104752	COLEC10	448.968	-6.16932	7.92518e-21	892.665	5.27095
ENSDARG00000070604	zgc:162509	602.079	5.13893	9.29626e-21	21.9838	1182.17
ENSDARG00000086847	irgq1	306.818	5.05692	3.37422e-20	11.8751	601.761
ENSDARG00000058464	rasd3	683.783	4.13309	6.18909e-20	60.3656	1307.2
ENSDARG00000045297	phb2a	977.204	4.84952	7.24476e-20	45.0083	1909.4
ENSDARG00000021086	znf367	192.386	4.85398	1.44947e-17	8.29512	376.477
ENSDARG00000103716	si:busm1-194e12.11	429.53	7.29803	1.44947e-17	1.25063	857.808
ENSDARG00000113572	si:dkey-102c8.3	200.383	4.86289	1.54041e-16	8.47879	392.288
ENSDARG00000021265	mybpc2b	281.655	7.60705	2.64656e-15	0	563.31
ENSDARG00000062478	ackr3a	1559.16	5.13651	5.55139e-15	43.8829	3074.44
ENSDARG00000070317	irge4	387.141	7.46853	7.09426e-15	0	774.283
ENSDARG00000091889	CR812481.1	589.082	-3.50323	8.92179e-14	1097.87	80.2935
ENSDARG00000041339	zgc:92380	309.243	4.12756	3.42168e-13	24.0655	594.421
ENSDARG00000023694	spon1b	494.886	-4.21298	1.1395e-12	954.908	34.8628
ENSDARG00000019907	dscc1	277.296	3.65601	1.47072e-12	32.7835	521.809
ENSDARG00000057531	pgap3	198.654	4.07011	3.64573e-12	15.5474	381.76
ENSDARG00000111902	FO704772.1	130.053	6.69449	4.50484e-12	0	260.106
ENSDARG00000071772	si:ch211-253p2.2	103.646	-3.90928	2.31829e-11	197.929	9.36322
ENSDARG00000016594	haus4	121.907	3.63662	4.57806e-11	14.3242	229.49
ENSDARG00000103199	si:dkey-247k7.2	111.232	6.28975	1.10493e-10	0	222.464
ENSDARG00000058480	chtf18	165.419	3.3986	1.61475e-10	23.0469	307.791
ENSDARG00000007221	pbk	271.758	3.50588	3.51066e-10	34.5262	508.989
ENSDARG00000103114	ndufa4l2a	138.95	-4.15281	4.84236e-10	268.697	9.20289
ENSDARG00000057100	zwilch	279.624	3.46236	6.6124e-10	36.8029	522.446
ENSDARG00000077862	si:dkey-169i5.4	216.159	-4.49829	7.47214e-10	423.445	8.8735
ENSDARG00000023713	aqp1a.1	1033.78	-4.4468	8.21053e-10	2022.46	45.1051
ENSDARG00000098477	tec	190.047	2.96948	9.89778e-10	37.1397	342.955
ENSDARG00000058533	pole	385.017	3.26513	1.03549e-09	59.5582	710.476
ENSDARG00000056719	slc6a19b	948.455	3.85937	1.50166e-09	82.8721	1814.04
ENSDARG00000098135	stk40	114.463	3.8591	1.8049e-09	9.79763	219.128
ENSDARG00000077620	cdca7a	1239.23	3.5325	1.83657e-09	149.205	2329.25
ENSDARG00000054929	zgc:110540	331.624	3.1697	1.85578e-09	55.1394	608.108
ENSDARG00000057683	mcm6	1890.27	2.95573	2.77237e-09	372.445	3408.1
ENSDARG00000039273	fbln5	313.526	-3.35726	4.9292e-09	583.43	43.6225
ENSDARG00000111699	CZQB01146713.1	48.6626	-5.72667	5.11153e-09	97.3251	0
ENSDARG00000015153	wdr91	182.729	3.18102	5.68687e-09	29.9507	335.507
ENSDARG00000093176	zgc:77118	80.2993	4.69809	6.71407e-09	2.47324	158.125
ENSDARG00000057738	hells	457.923	2.99076	6.89509e-09	86.9641	828.881
ENSDARG00000093440	tnfaip6	448.09	3.56904	6.89509e-09	50.8445	845.336
ENSDARG00000105367	si:dkey-88n24.11	77.3649	4.83518	6.89509e-09	1.93783	152.792
ENSDARG00000041848	rh50	511.784	3.03076	7.06022e-09	94.3278	929.24
ENSDARG00000093619	sult3st2	52.9482	5.64895	7.29643e-09	0	105.896
ENSDARG00000100279	CU457819.1	94.5842	3.50756	7.29643e-09	11.4874	177.681
ENSDARG00000019507	mcm5	2294	3.03009	7.63654e-09	421.24	4166.77
ENSDARG00000089156	egr3	2185.9	-2.20303	8.30377e-09	3634.23	737.569
ENSDARG00000004874	spata6l	285.516	3.41158	8.44293e-09	37.515	533.518
ENSDARG00000035350	ins	11708.2	-3.73911	8.44293e-09	23382.7	33.6057
ENSDARG00000013022	si:ch211-59h6.1	803.707	2.53834	8.81506e-09	215.474	1391.94
ENSDARG00000092425	BX677668.2	136.147	3.72906	9.00374e-09	13.2572	259.037
ENSDARG00000079543	dpys	1863.52	-2.53073	9.56502e-09	3225.46	501.581
ENSDARG00000096527	BX548015.2	273.478	3.32022	1.0773e-08	39.0487	507.906
ENSDARG00000098296	gnsb	522.424	3.23845	1.08142e-08	79.9167	964.932
ENSDARG00000097446	si:ch211-66i15.5	126.526	5.70442	1.24564e-08	0.815073	252.237
ENSDARG00000117637	CABZ01005379.1	73.0223	3.87745	1.49944e-08	5.77783	140.267
ENSDARG00000087717	tmprss5	60.5731	4.7681	1.52069e-08	1.82195	119.324
ENSDARG00000077252	si:rp71-36a1.5	46.8323	5.51124	1.57109e-08	0	93.6646
ENSDARG00000108060	LO017771.1	195.687	3.12753	2.79994e-08	32.5647	358.81
ENSDARG00000096906	si:dkey-7i4.24	90.7734	4.69109	2.85457e-08	2.24552	179.301
ENSDARG00000005993	prc1b	211.682	3.56868	3.2057e-08	23.0986	400.265
ENSDARG00000044491	kif20a	131.132	3.9351	3.22607e-08	9.50146	252.763
ENSDARG00000045853	rad51ap1	104.611	2.91235	3.41836e-08	20.953	188.268
ENSDARG00000077726	nocta	11355.2	-2.29374	3.41836e-08	19124	3586.42
ENSDARG00000042000	si:ch211-63o20.7	73.7389	3.50407	3.55544e-08	8.49482	138.983
ENSDARG00000040224	krcp	228.771	2.96354	3.68363e-08	43.4168	414.124
ENSDARG00000101123	CABZ01009512.1	50.5698	5.35764	4.29181e-08	0	101.14
ENSDARG00000043720	cdc45	235.596	2.85066	4.48571e-08	49.2974	421.894
ENSDARG00000036990	dctd	534.575	3.2245	4.67066e-08	80.9494	988.201
ENSDARG00000100918	prc1a	186.297	3.51171	6.74115e-08	21.2365	351.358
ENSDARG00000095688	zgc:162509	42.636	5.28611	6.74917e-08	0	85.272
ENSDARG00000089922	dsn1	188.001	3.03494	7.14777e-08	33.6465	342.355
ENSDARG00000101707	si:ch211-156b7.4	906.036	2.25842	7.14777e-08	292.47	1519.6
ENSDARG00000102349	cep55l	112.081	3.9047	7.14777e-08	8.10717	216.055
ENSDARG00000102987	capn7	258.853	3.49467	7.14777e-08	29.7787	487.928
ENSDARG00000042894	tyms	595.224	2.93082	7.39198e-08	115.811	1074.64
ENSDARG00000102245	tk1	255.161	3.09622	8.04031e-08	42.8889	467.433
ENSDARG00000102798	mcm2	1936.17	2.98779	9.11087e-08	356.994	3515.35
ENSDARG00000015070	pola2	563.927	2.26919	9.20326e-08	180.442	947.412
ENSDARG00000071694	ndc80	196.178	2.84875	9.6668e-08	40.7751	351.581
ENSDARG00000016044	gins4	251.465	3.05478	1.12866e-07	43.839	459.092
ENSDARG00000091499	zmp:0000001020	71.751	4.0556	1.12944e-07	4.38715	139.115
ENSDARG00000113399	FP236630.1	87.4423	3.80264	1.24589e-07	7.04834	167.836
ENSDARG00000034222	hs1bp3	575.144	2.26802	1.30998e-07	183.496	966.791
ENSDARG00000041411	rad51	295.505	2.46508	1.30998e-07	82.2414	508.769
ENSDARG00000104765	chek1	127.307	3.16793	1.30998e-07	20.0577	234.556
ENSDARG00000105343	klhl33	381.61	-3.64173	1.31616e-07	726.818	36.4015
ENSDARG00000044010	loxl2a	46.7975	4.3715	1.34909e-07	1.866	91.729
ENSDARG00000073961	si:ch211-160j14.2	90.0382	-3.58427	1.3746e-07	170.814	9.26182
ENSDARG00000010186	myo3a	56.1466	-4.09264	1.61074e-07	109.263	3.02994
ENSDARG00000061385	haus3	134.209	3.36592	1.73228e-07	16.8862	251.531
ENSDARG00000095047	si:dkey-85k15.4	52.7672	4.49049	1.80546e-07	1.88589	103.649
ENSDARG00000032653	sinhcaf	2663.65	-2.18843	1.80791e-07	4430.49	896.797
ENSDARG00000009087	cd74a	38398.7	-2.51894	1.85555e-07	66577.9	10219.5
ENSDARG00000043260	xylb	49.4365	4.0554	1.86057e-07	2.78906	96.0839
ENSDARG00000090120	si:dkey-248g21.1	62.9262	4.26003	1.93081e-07	2.65306	123.199
ENSDARG00000075682	orc6	406.524	2.80227	1.98435e-07	86.7916	726.256
ENSDARG00000104547	BX005367.1	87.1897	-3.1474	2.03037e-07	160.539	13.8405
ENSDARG00000040485	gsdmeb	178.621	3.1183	2.0955e-07	28.8721	328.369
ENSDARG00000076250	rasef	35.1283	5.05836	2.35381e-07	0	70.2565
ENSDARG00000059365	nipal4	647.281	-3.43381	2.37865e-07	1218.47	76.0952
ENSDARG00000037188	rpa2	2133.37	2.00951	2.47258e-07	807.071	3459.68
ENSDARG00000091320	nlrc6	1191.07	-2.28841	2.47258e-07	2008.39	373.745
ENSDARG00000076602	prss16	1813.27	1.92568	2.49398e-07	723.303	2903.24
ENSDARG00000104640	BX511034.7	110.024	3.83822	3.1578e-07	8.13091	211.917
ENSDARG00000023683	cacna1fb	345.163	-2.66489	3.41377e-07	608.677	81.6503
ENSDARG00000037064	galca	1108.66	2.21623	3.67834e-07	364.845	1852.47
ENSDARG00000080675	si:dkey-71b5.7	33.1065	4.98048	3.70107e-07	0	66.2129
ENSDARG00000015998	wdhd1	225.661	2.836	3.71224e-07	46.493	404.829
ENSDARG00000008141	rbl1	449.492	2.29608	3.97767e-07	139.803	759.181
ENSDARG00000096689	si:dkey-66i24.9	213.315	2.33257	4.41157e-07	64.8128	361.817
ENSDARG00000038207	aldh4a1	598.573	2.28532	5.40193e-07	187.531	1009.62
ENSDARG00000070239	knl1	49.8205	4.0871	5.9185e-07	2.45336	97.1876
ENSDARG00000076139	si:dkey-71p21.13	97.1718	3.52772	5.9185e-07	10.1288	184.215
ENSDARG00000058471	plk1	659.325	3.00435	6.89894e-07	115.835	1202.81
ENSDARG00000076228	kif2c	212.255	2.89742	6.91639e-07	41.1587	383.352
ENSDARG00000023002	dtl	59.8539	3.34518	6.99435e-07	7.62756	112.08
ENSDARG00000019235	sema3aa	67.9362	-4.2547	7.79748e-07	133.698	2.17405
ENSDARG00000101873	dtwd2	38.5204	4.11515	8.21756e-07	1.96585	75.0749
ENSDARG00000074428	hhat	135.156	2.6575	8.45144e-07	31.6775	238.636
ENSDARG00000012271	pacc1	222.757	2.63563	8.49836e-07	53.0832	392.431
ENSDARG00000045265	gsg1l2b	255.835	3.23089	8.65105e-07	36.0559	475.614
ENSDARG00000100024	hist1h2a6	101.946	3.14996	8.70645e-07	15.7027	188.189
ENSDARG00000102657	lman2la	175.914	2.82898	8.70645e-07	36.0721	315.756
ENSDARG00000105273	FP074902.2	935.5	-2.71577	9.72142e-07	1661.49	209.506
ENSDARG00000070774	irgf1	57.2765	4.18425	9.9804e-07	2.1538	112.399
ENSDARG00000042518	hipk2	1698.52	2.57351	1.00985e-06	426.838	2970.21
ENSDARG00000113976	pimr162	36.6747	-4.71772	1.00985e-06	73.3494	0
ENSDARG00000040536	ftr90	29.8026	4.80128	1.03458e-06	0	59.6052
ENSDARG00000091150	mki67	573.365	2.91168	1.16966e-06	108.376	1038.35
ENSDARG00000062884	map3k2	347.417	2.72832	1.18128e-06	76.4585	618.375
ENSDARG00000006112	myof	55.5255	4.08894	1.18401e-06	2.70096	108.35
ENSDARG00000059714	arsk	343.402	2.55982	1.18401e-06	87.3555	599.448
ENSDARG00000063150	nrxn2b	71.9793	-2.76956	1.18401e-06	128.527	15.4315
ENSDARG00000094892	cenph	120.991	2.69377	1.22912e-06	27.6934	214.288
ENSDARG00000039891	BX323555.2	59.1089	3.42111	1.27836e-06	6.77657	111.441
ENSDARG00000013317	pygmb	621.787	-3.0278	1.28358e-06	1138.5	105.071
ENSDARG00000030129	si:ch211-87m7.2	350.534	2.76308	1.34546e-06	75.1703	625.898
ENSDARG00000020488	arhgap17a	660.68	2.75764	1.41642e-06	141.891	1179.47
ENSDARG00000020887	armc1l	288.385	2.69799	1.41642e-06	65.491	511.28
ENSDARG00000097082	im:7152348	864.005	-2.17022	1.41642e-06	1436.66	291.351
ENSDARG00000076294	klb	101.844	3.16175	1.47583e-06	14.8681	188.82
ENSDARG00000086539	CABZ01115881.1	43.2781	4.11721	1.47583e-06	2.02979	84.5265
ENSDARG00000036628	cd74b	23657.3	-2.379	1.50803e-06	40449.4	6865.28
ENSDARG00000052565	cenpi	52.2292	3.21383	1.51182e-06	7.36392	97.0946
ENSDARG00000014685	esco2	202.165	2.89539	1.57288e-06	38.5333	365.796
ENSDARG00000098622	ccne1	175.814	2.40216	1.57789e-06	50.169	301.46
ENSDARG00000026028	ankrd44	76.6141	3.23804	1.68357e-06	10.2411	142.987
ENSDARG00000091728	zgc:114046	409.101	-2.49717	1.6856e-06	709.811	108.392
ENSDARG00000093349	si:ch211-141e20.2	691.713	2.27655	1.7086e-06	215.981	1167.44
ENSDARG00000004953	mxb	379.147	3.74826	1.74902e-06	26.4482	731.846
ENSDARG00000046142	asgrl1	22923.7	-1.8457	1.76574e-06	36293.7	9553.65
ENSDARG00000042270	arsa	153.955	3.42745	1.79927e-06	16.6903	291.22
ENSDARG00000059059	emsy	189.51	3.49796	1.89895e-06	18.9155	360.104
ENSDARG00000101180	mcm7	262.053	2.85993	1.89895e-06	51.4431	472.662
ENSDARG00000102687	CABZ01085139.1	161.125	2.64931	2.14085e-06	37.5271	284.722
ENSDARG00000019156	haus5	88.3561	3.51505	2.16921e-06	8.63034	168.082
ENSDARG00000093926	CR855277.3	56.9876	3.98253	2.22867e-06	2.91669	111.059
ENSDARG00000114370	FQ312024.1	45.4296	5.00795	2.22867e-06	0.307686	90.5515
ENSDARG00000101037	asf1ba	602.238	2.10199	2.2351e-06	211.898	992.579
ENSDARG00000109869	zgc:174719	62.3546	-4.29883	2.401e-06	123.342	1.36696
ENSDARG00000033757	ncaph2	357.157	2.13697	2.60906e-06	122.849	591.466
ENSDARG00000109563	LSM10	25.5388	4.61468	2.76204e-06	0	51.0777
ENSDARG00000089661	FO704622.1	336.318	3.04104	2.79154e-06	54.8372	617.799
ENSDARG00000061468	ncaph	178.421	2.67715	3.07605e-06	40.5873	316.255
ENSDARG00000091847	si:ch211-181d7.1	41.4562	4.90292	3.07605e-06	0.471472	82.4409
ENSDARG00000093054	BX548073.3	227.539	-2.44933	3.07605e-06	392.991	62.086
ENSDARG00000043806	postna	308.624	2.49113	3.09441e-06	81.8734	535.374
ENSDARG00000062956	dagla	129.134	2.81867	3.09441e-06	25.8915	232.377
ENSDARG00000068219	b3gnt2l	9249.76	1.87368	3.12514e-06	3779.77	14719.8
ENSDARG00000058968	haus1	154.723	3.04534	3.20749e-06	25.2444	284.202
ENSDARG00000089795	sertad4	892.154	-1.99135	3.20749e-06	1446.64	337.671
ENSDARG00000058260	cip2a	86.1305	3.28521	3.37047e-06	10.804	161.457
ENSDARG00000103285	CCDC134	36.9427	4.51744	3.37931e-06	0	73.8855
ENSDARG00000040623	fosl2	17837.3	-1.89273	3.40673e-06	28476.3	7198.28
ENSDARG00000102640	pdia3	22418.7	1.77703	3.47423e-06	9726.75	35110.6
ENSDARG00000061480	si:ch211-132b12.1	126.853	2.69669	3.49842e-06	28.3811	225.324
ENSDARG00000018065	ntm	48.7352	4.31938	3.52689e-06	1.23075	96.2397
ENSDARG00000044807	dck	347.037	2.49265	3.58724e-06	91.266	602.807
ENSDARG00000109611	FP236810.1	348.358	2.38412	3.60379e-06	99.6087	597.107
ENSDARG00000022085	si:dkey-34e4.1	263.469	2.95599	3.64152e-06	46.3223	480.615
ENSDARG00000094500	si:ch211-238e22.4	347.138	-2.03253	3.64175e-06	566.591	127.685
ENSDARG00000038066	kpna2	1379.79	2.53708	3.74686e-06	350.691	2408.89
ENSDARG00000013072	mmp15b	1641.61	2.70367	3.80638e-06	362.997	2920.21
ENSDARG00000044808	slc4a4b	3114.5	2.37684	4.32062e-06	895.571	5333.42
ENSDARG00000028088	galk1	529.979	2.17965	4.63992e-06	176.198	883.76
ENSDARG00000036781	si:dkey-170l10.1	237.96	2.29089	4.70514e-06	72.6378	403.283
ENSDARG00000117808	CABZ01068366.1	99.9005	3.09668	4.70514e-06	15.3112	184.49
ENSDARG00000005462	kif4	57.3121	3.27903	4.76109e-06	7.24804	107.376
ENSDARG00000007795	cst3	34698.6	-2.34384	4.83211e-06	59177.3	10220
ENSDARG00000074781	ptprt	35.4599	4.83623	5.1241e-06	0.307686	70.6121
ENSDARG00000089790	efna5a	37.1753	4.14866	5.20429e-06	1.3306	73.02
ENSDARG00000098537	spata22	159.829	-2.46545	5.54503e-06	276.852	42.8065
ENSDARG00000114895	si:ch211-113a14.22	116.72	3.53804	5.71705e-06	10.3685	223.072
ENSDARG00000099313	naga	2259.39	1.82713	5.79087e-06	948.42	3570.36
ENSDARG00000037640	aurkb	252.63	2.85724	5.8239e-06	48.4867	456.773
ENSDARG00000051854	cdt1	243.457	2.3918	5.8239e-06	69.0917	417.822
ENSDARG00000100150	FQ377903.1	115.758	2.84791	6.04587e-06	22.3477	209.169
ENSDARG00000039319	vps37b	609.166	2.38827	6.09591e-06	172.628	1045.7
ENSDARG00000026454	mis12	238.006	2.06108	6.1101e-06	85.5986	390.413
ENSDARG00000035880	atp6v1c1b	562.142	1.91217	6.1101e-06	223.479	900.805
ENSDARG00000040163	prim1	875.262	2.06049	6.1101e-06	315.3	1435.22
ENSDARG00000063621	aadac	40.6783	3.47494	6.1101e-06	4.06747	77.2891
ENSDARG00000077547	tmlhe	71.1014	2.75045	6.1101e-06	14.9917	127.211
ENSDARG00000101611	HUS1B	213.013	2.11947	6.1101e-06	73.759	352.266
ENSDARG00000076308	pdp1	95.3918	2.74542	6.15479e-06	20.0782	170.705
ENSDARG00000038709	MYADM	240.394	2.91992	6.46462e-06	42.8385	437.949
ENSDARG00000059841	exosc1	148.488	2.59669	6.60162e-06	35.5218	261.454
ENSDARG00000090063	fa2h	3670.36	-1.87477	7.98515e-06	5848	1492.71
ENSDARG00000033871	derl3	128.286	2.84713	8.15007e-06	24.8285	231.743
ENSDARG00000112361	si:dkey-102c8.2	57.6034	3.22954	8.15007e-06	7.58351	107.623
ENSDARG00000097493	si:dkey-148h10.5	63.5454	3.28004	8.20123e-06	7.79134	119.299
ENSDARG00000105120	gab2	195.122	2.563	8.26598e-06	48.1155	342.128
ENSDARG00000062156	abi3bpa	37.3571	4.27908	8.55127e-06	0	74.7142
ENSDARG00000100573	ckap2l	83.5831	3.20223	8.58343e-06	11.1436	156.023
ENSDARG00000014943	kif23	251.884	3.0354	9.07082e-06	39.772	463.996
ENSDARG00000034773	ncapd3	147.611	2.67664	9.84156e-06	33.0158	262.206
ENSDARG00000099194	CABZ01058261.1	132.661	3.06788	1.00565e-05	20.3336	244.989
ENSDARG00000102340	ptn	29.9351	-4.65628	1.00594e-05	59.5968	0.273393
ENSDARG00000099320	CU138553.1	834.943	-2.35511	1.02393e-05	1428.12	241.769
ENSDARG00000058871	zgc:171857	706.65	2.445	1.06713e-05	190.353	1222.95
ENSDARG00000075619	cenpo	103.934	2.6778	1.22e-05	23.0984	184.77
ENSDARG00000113599	hbbe1.1	79.8884	3.00293	1.22e-05	13.1854	146.591
ENSDARG00000099770	CU104782.1	35.7975	4.604	1.22987e-05	0.471472	71.1236
ENSDARG00000089529	desi1b	146.723	2.24592	1.23916e-05	45.9262	247.52
ENSDARG00000089307	pmaip1	5627.1	-2.20611	1.24579e-05	9435.97	1818.23
ENSDARG00000069190	zgc:172339	47.2681	3.4005	1.271e-05	4.91057	89.6256
ENSDARG00000110103	FO834799.1	96.075	2.87966	1.271e-05	17.6568	174.493
ENSDARG00000096234	tac4	6450.11	-2.64254	1.31053e-05	11431.1	1469.15
ENSDARG00000037281	fgg	416.041	2.57279	1.33275e-05	100.633	731.448
ENSDARG00000022413	ing5a	99.3955	2.81448	1.34877e-05	19.347	179.444
ENSDARG00000100166	si:dkeyp-9d4.3	3624.56	-2.08663	1.36598e-05	5974.61	1274.5
ENSDARG00000010729	CABZ01073795.1	716.426	2.77357	1.37882e-05	144.763	1288.09
ENSDARG00000057263	zgc:173729	26.0782	4.25938	1.44356e-05	0	52.1564
ENSDARG00000027867	paplna	20.8403	4.28721	1.45635e-05	0	41.6806
ENSDARG00000053476	lipca	399.857	-2.08989	1.46609e-05	659.611	140.104
ENSDARG00000097799	zgc:194207	2054.34	-2.01828	1.50905e-05	3351.83	756.846
ENSDARG00000011094	ccna2	385.96	2.41958	1.51128e-05	105.736	666.185
ENSDARG00000042188	ttc38	457.44	2.14872	1.53118e-05	154.059	760.822
ENSDARG00000059235	zgc:113274	43.216	3.73299	1.54778e-05	2.46149	83.9706
ENSDARG00000054196	slc38a8b	281.715	-2.5494	1.59992e-05	494.124	69.3059
ENSDARG00000091958	BX677668.1	33.257	4.40687	1.61017e-05	0.879009	65.635
ENSDARG00000058127	hcfc2	90.2705	2.72271	1.62797e-05	18.8796	161.661
ENSDARG00000013245	wbp1la	172.915	2.51963	1.64411e-05	43.3893	302.441
ENSDARG00000035649	ext1c	22.9412	4.24782	1.64411e-05	0	45.8823
ENSDARG00000058830	zdhhc3b	541.573	2.45784	1.64411e-05	143.498	939.648
ENSDARG00000030440	rsrp1	40671.2	-1.86425	1.64824e-05	64752.4	16590.1
ENSDARG00000013476	arhgef39	370.482	3.30394	1.66521e-05	40.99	699.974
ENSDARG00000117687	CR391953.1	123.897	-2.53714	1.66521e-05	217.111	30.6832
ENSDARG00000040041	mcm4	2428.45	2.52604	1.67791e-05	608.365	4248.53
ENSDARG00000052094	notch1b	303.848	2.57471	1.76547e-05	72.6902	535.006
ENSDARG00000092033	si:dkey-239h2.3	2455.69	-2.45966	1.76547e-05	4262.25	649.126
ENSDARG00000097452	CU929070.5	3502.25	-2.17469	1.76547e-05	5850.99	1153.51
ENSDARG00000094554	si:ch73-7i4.1	22.5111	-4.1503	1.76921e-05	45.0222	0
ENSDARG00000020890	tmod4	20.1242	4.23712	1.81145e-05	0	40.2484
ENSDARG00000095882	FP325358.1	22.2382	4.22574	1.81145e-05	0	44.4765
ENSDARG00000055731	si:dkeyp-69e1.8	284.99	1.98495	1.82261e-05	107.052	462.927
ENSDARG00000112843	BX908796.3	35.2232	3.7679	1.828e-05	2.10162	68.3448
ENSDARG00000086033	tspan5a	362.363	2.10097	1.86503e-05	125.675	599.051
ENSDARG00000024471	nsl1	181.69	1.98319	1.88053e-05	68.4492	294.931
ENSDARG00000115161	CABZ01069162.1	49.8536	3.69348	1.94212e-05	3.02468	96.6825
ENSDARG00000091833	sv2	272.434	2.02136	1.9702e-05	99.82	445.049
ENSDARG00000025174	zgc:103482	35.9847	4.13507	1.97314e-05	1.08684	70.8826
ENSDARG00000075584	itfg1	324.827	2.6424	1.97626e-05	72.8829	576.771
ENSDARG00000026224	fanci	102.039	2.561	2.00308e-05	24.6531	179.425
ENSDARG00000094171	lrp1ba	20.6873	4.20678	2.03311e-05	0	41.3746
ENSDARG00000097009	FP102888.2	35.4068	3.80248	2.18149e-05	1.866	68.9475
ENSDARG00000007727	rgl2	1408.78	2.15322	2.26722e-05	469.98	2347.58
ENSDARG00000103750	si:ch211-246m6.5	20.8997	4.18179	2.28411e-05	0	41.7995
ENSDARG00000101975	si:dkey-225f5.4	158.956	2.66224	2.29717e-05	35.1887	282.722
ENSDARG00000104100	bmpr1ba	52.3734	3.91042	2.29717e-05	1.84612	102.901
ENSDARG00000103648	znf536	616.224	-2.29173	2.33333e-05	1047.07	185.38
ENSDARG00000077002	igsf3	888.34	2.29	2.34236e-05	267.355	1509.33
ENSDARG00000015747	aarsd1	597.003	1.78265	2.37669e-05	256.141	937.866
ENSDARG00000009153	pla2g1b	7916.7	-1.96204	2.41846e-05	12814.1	3019.3
ENSDARG00000063594	hipk1a	164.293	2.39348	2.44222e-05	45.7697	282.815
ENSDARG00000062550	rc3h1a	320.157	2.46368	2.45695e-05	83.8133	556.501
ENSDARG00000046012	slc47a1	210.149	-2.534	2.4611e-05	368.491	51.8074
ENSDARG00000100301	CABZ01065328.2	30.6516	4.35151	2.50441e-05	0.779158	60.5241
ENSDARG00000086418	si:ch211-236p5.3	126.034	-3.00652	2.53974e-05	232.453	19.6145
ENSDARG00000113274	AL929536.3	150.748	2.93962	2.65828e-05	25.176	276.32
ENSDARG00000092172	si:dkey-96n2.1	3421.77	-2.05691	2.81165e-05	5622.47	1221.06
ENSDARG00000097770	si:ch211-167j9.4	400.88	-2.43629	2.88186e-05	694.553	107.207
ENSDARG00000034368	hexb	8851.33	1.65307	2.88955e-05	4110.63	13592
ENSDARG00000071212	p3h1	113.246	2.42397	2.92566e-05	30.6144	195.877
ENSDARG00000092853	BX510324.1	28.471	4.401	3.06059e-05	0.471472	56.4706
ENSDARG00000078654	tpx2	265.863	2.97604	3.13598e-05	42.3216	489.404
ENSDARG00000106267	CR388042.1	131.472	-3.24365	3.18531e-05	247.83	15.1138
ENSDARG00000063009	catip	52.9706	3.53733	3.28482e-05	3.84789	102.093
ENSDARG00000090901	si:ch211-256e16.11	133.667	2.25184	3.31619e-05	41.0518	226.283
ENSDARG00000061566	slc7a3b	2396.83	-1.75947	3.32495e-05	3752.04	1041.63
ENSDARG00000058969	cntnap2a	61.1706	-2.97402	3.35297e-05	112.631	9.71066
ENSDARG00000117510	CU302321.1	18.3674	4.1092	3.36358e-05	0	36.7347
ENSDARG00000105718	CABZ01068273.1	27.7976	4.37242	3.48147e-05	0.471472	55.1238
ENSDARG00000074546	si:ch211-213a13.2	2093.83	-2.09128	3.59645e-05	3460.05	727.615
ENSDARG00000063285	ube2t	283.715	2.06035	3.6232e-05	100.936	466.494
ENSDARG00000001733	gulp1a	913.975	-2.0569	3.6925e-05	1502.68	325.275
ENSDARG00000024488	top2a	293.665	2.75772	3.84863e-05	58.4395	528.89
ENSDARG00000105355	zgc:154164	142.451	-2.38765	3.85526e-05	245.531	39.3711
ENSDARG00000094018	si:dkey-111e8.1	405.631	2.51376	3.92976e-05	100.621	710.64
ENSDARG00000037813	zgc:113278	68.9312	2.92689	3.96284e-05	11.356	126.507
ENSDARG00000075354	espl1	68.3353	2.92772	4.02084e-05	11.5152	125.155
ENSDARG00000073883	clstn3	793.794	-2.18981	4.12044e-05	1331.35	256.234
ENSDARG00000003642	zfyve19	287.742	1.80794	4.1255e-05	121.1	454.384
ENSDARG00000053906	angpt2b	312.852	2.42236	4.22276e-05	84.2619	541.442
ENSDARG00000040303	nbn	115.565	2.22483	4.25845e-05	36.2088	194.92
ENSDARG00000030759	melk	29.9647	4.25001	4.35883e-05	0.779158	59.1502
ENSDARG00000076659	cdca7b	618.098	2.52019	4.40256e-05	152.677	1083.52
ENSDARG00000078676	myrf	663.034	-1.93188	4.46748e-05	1069.12	256.946
ENSDARG00000017744	smc2	236.435	2.58199	4.50284e-05	55.3425	417.527
ENSDARG00000040799	sst1.1	27278.3	-3.4437	4.50284e-05	54010.7	545.859
ENSDARG00000078600	ldlrad3	236.747	1.83778	4.50284e-05	97.7728	375.721
ENSDARG00000100858	zgc:171695	148.636	2.82597	4.59211e-05	27.3145	269.957
ENSDARG00000060210	d2hgdh	53.664	3.28931	4.65175e-05	5.43037	101.898
ENSDARG00000112175	zgc:173552	36.1262	4.17649	4.65175e-05	0.942944	71.3094
ENSDARG00000016963	slc16a1a	515.254	1.71096	4.88018e-05	230.547	799.96
ENSDARG00000040439	rsl24d1	51290.7	-2.21116	4.88118e-05	86330.2	16251.1
ENSDARG00000008832	neu1	403.741	2.09766	4.93593e-05	138.839	668.643
ENSDARG00000069326	mus81	186.567	2.08931	4.9811e-05	64.8204	308.313
ENSDARG00000074451	mnd1	264.819	2.59541	4.9811e-05	60.9958	468.642
ENSDARG00000102226	gpr19	48.5851	3.00905	4.9811e-05	7.23629	89.9338
ENSDARG00000103642	pglyrp6	1316.29	-2.82007	4.9811e-05	2389.69	242.883
ENSDARG00000052721	prim2	934.018	2.01935	5.09905e-05	340.694	1527.34
ENSDARG00000090427	si:dkey-246i14.3	33.7789	3.77384	5.09905e-05	1.63015	65.9276
ENSDARG00000074510	mhc2bl	26.8252	4.33221	5.11452e-05	0.307686	53.3427
ENSDARG00000014967	g6pcb	67.1621	-3.05826	5.19678e-05	124.78	9.54442
ENSDARG00000090847	si:ch211-209l18.4	1316.93	-1.65479	5.19811e-05	2024.34	609.527
ENSDARG00000035719	arl5c	22128.8	-1.90521	5.20307e-05	35537.4	8720.16
ENSDARG00000057323	e2f8	186.571	2.38182	5.20307e-05	51.6667	321.476
ENSDARG00000090770	FO834800.1	277.912	2.03303	5.35562e-05	99.9482	455.877
ENSDARG00000055120	ctsba	11089.8	1.88619	5.40092e-05	4424.66	17755
ENSDARG00000076487	haao	283.105	1.91064	5.40092e-05	111.337	454.874
ENSDARG00000071685	slco5a1a	101.01	3.32336	5.62294e-05	9.52201	192.499
ENSDARG00000073764	si:ch211-113j14.1	171.686	2.61438	5.67978e-05	38.642	304.73
ENSDARG00000016598	ckmt1	6783.86	1.6571	5.82031e-05	3133.69	10434
ENSDARG00000087554	cdk1	772.536	2.68425	6.08571e-05	162.547	1382.52
ENSDARG00000094653	si:dkey-149m13.5	159.424	2.23211	6.38215e-05	49.1953	269.653
ENSDARG00000091138	actr3	1092.78	2.63125	6.44034e-05	240.905	1944.64
ENSDARG00000032816	tm7sf2	510.522	2.73218	6.45614e-05	101.713	919.331
ENSDARG00000103682	si:dkey-23i12.5	8047.15	-2.04393	6.59324e-05	13220	2874.29
ENSDARG00000077822	si:dkey-6i22.5	263.091	2.41087	6.64213e-05	70.9974	455.185
ENSDARG00000099710	BX284696.1	848.54	-1.67859	6.64573e-05	1310.38	386.699
ENSDARG00000021184	rbfox1l	86.111	2.93623	6.75047e-05	13.7928	158.429
ENSDARG00000105088	tenm4	25.2577	-4.20837	6.75575e-05	50.0323	0.483122
ENSDARG00000040072	scpep1	2076.09	1.59989	6.76501e-05	992.06	3160.12
ENSDARG00000016319	c9	1334.05	-1.80958	6.89219e-05	2109.12	558.987
ENSDARG00000041361	ttk	198.757	3.05041	7.04443e-05	27.7368	369.777
ENSDARG00000019815	fn1a	3560.85	-1.65402	7.05955e-05	5475.23	1646.47
ENSDARG00000040076	pycard	198.433	2.36542	7.12175e-05	55.5542	341.312
ENSDARG00000071543	si:dkey-42i9.7	607.362	2.04703	7.12175e-05	216.58	998.144
ENSDARG00000077782	acer2	84.0752	2.42447	7.13443e-05	22.523	145.627
ENSDARG00000043468	sytl3	142.201	2.31903	7.30907e-05	40.9799	243.422
ENSDARG00000013719	gtse1	125.78	2.88027	7.35805e-05	21.2886	230.271
ENSDARG00000077666	evi5a	537.603	1.68266	7.78778e-05	243.907	831.3
ENSDARG00000005648	olfml2a	271.806	1.8796	7.80592e-05	108.402	435.209
ENSDARG00000011404	fen1	1488.74	1.76443	7.90624e-05	641.937	2335.55
ENSDARG00000002880	vps50	121.359	2.11995	7.94763e-05	40.688	202.03
ENSDARG00000060023	ncapg2	237.769	2.36963	8.02435e-05	66.1224	409.416
ENSDARG00000094263	CU539058.1	570.493	-2.03254	8.22239e-05	936.054	204.931
ENSDARG00000109458	hist1h2a1	38.962	3.44528	8.48085e-05	3.07258	74.8515
ENSDARG00000077637	mal2	2369.82	2.00732	8.68612e-05	866.128	3873.52
ENSDARG00000045815	mcm10	56.9657	2.92823	8.9724e-05	9.04601	104.885
ENSDARG00000002707	her11	1139.05	-1.60091	9.12893e-05	1734.76	543.347
ENSDARG00000093253	MFSD3	66.0279	2.46126	9.12893e-05	16.9293	115.126
ENSDARG00000045750	syt10	22.1042	-4.07808	9.20274e-05	43.6117	0.596769
ENSDARG00000090041	F2R	55.7328	2.966	9.35751e-05	8.5147	102.951
ENSDARG00000000567	znf281a	373.195	-1.87216	9.40165e-05	596.643	149.747
ENSDARG00000017636	rnf167	221.898	2.08687	9.40165e-05	76.6482	367.147
ENSDARG00000009544	cldnb	85507	-2.03826	9.40704e-05	140465	30549.5
ENSDARG00000058794	si:dkey-19a16.2	311.577	2.40482	9.40704e-05	83.5571	539.597
ENSDARG00000076554	cdkn1a	1679.93	1.65094	9.59891e-05	777.327	2582.53
ENSDARG00000068478	gpx4a	7590.85	-1.80314	9.86381e-05	11995	3186.7
ENSDARG00000086112	si:ch211-266i6.3	400.949	2.9667	0.000100945	60.3081	741.59
ENSDARG00000027461	mettl26	813.622	1.90298	0.000108688	318.978	1308.26
ENSDARG00000012073	kif15	121.788	2.42679	0.000109398	32.0805	211.496
ENSDARG00000113481	si:ch211-113a14.19	168.474	2.51363	0.000109398	41.0071	295.941
ENSDARG00000004702	irf2bp2a	1047.22	2.60046	0.000109462	233.83	1860.61
ENSDARG00000058475	ern2	206.16	2.3651	0.000109462	56.9027	355.418
ENSDARG00000033273	primpol	188.505	2.49656	0.00011162	46.6439	330.366
ENSDARG00000035601	dao.3	970.406	-2.50953	0.00011686	1705.3	235.51
ENSDARG00000016994	ssrp1b	593.469	1.91854	0.000117278	230.309	956.63
ENSDARG00000077582	ank3b	608.068	2.08855	0.000118537	208.573	1007.56
ENSDARG00000031745	mhc2a	19678.8	-2.14242	0.000119527	32868.3	6489.3
ENSDARG00000032126	scg5	1346.14	-2.46094	0.000119527	2350.95	341.344
ENSDARG00000078204	BX072576.1	28.2564	3.76268	0.00012098	1.22261	55.2901
ENSDARG00000090612	FO904898.3	1016.72	-2.87089	0.000122409	1863.94	169.505
ENSDARG00000060797	pfkmb	29.3578	-3.85179	0.00012447	57.9908	0.724683
ENSDARG00000101379	mfsd1	61.6683	2.42431	0.000125287	16.0946	107.242
ENSDARG00000005085	ggctb	37.3419	4.09147	0.000126062	0.615373	74.0683
ENSDARG00000010641	slc20a1b	18851.9	-1.73283	0.000133493	29435.8	8268.03
ENSDARG00000088293	doc2b	138.311	2.03793	0.00013404	49.1427	227.48
ENSDARG00000076117	stard5	21.6929	4.11454	0.000134259	0.307686	43.0782
ENSDARG00000093130	CR788254.2	116.051	-2.30131	0.000134259	198.432	33.6703
ENSDARG00000011076	zgc:91968	50.316	3.2761	0.000145518	4.69074	95.9413
ENSDARG00000005058	ncapd2	222.871	2.38588	0.000151068	60.1142	385.628
ENSDARG00000036974	ripply3	66.2379	2.65271	0.000151935	13.7933	118.683
ENSDARG00000019525	tbcelb	264.048	1.80653	0.000152161	110.153	417.943
ENSDARG00000096888	serpinb1l4	19.5088	3.72038	0.000153282	0	39.0175
ENSDARG00000104042	b4galt4	266.065	1.95973	0.000155195	99.9397	432.191
ENSDARG00000067829	ppargc1a	101.095	2.3106	0.000156174	28.9289	173.262
ENSDARG00000032264	mybl2b	198.697	2.45066	0.000156485	50.6719	346.722
ENSDARG00000076111	CABZ01072254.1	233.212	2.04029	0.000156485	82.6067	383.817
ENSDARG00000017163	sinup	286.223	-1.6915	0.000159736	443.716	128.729
ENSDARG00000059175	cep19	137.161	2.1825	0.000160469	43.5683	230.753
ENSDARG00000076448	serpinf2a	2171.17	-1.98966	0.000162879	3543.62	798.719
ENSDARG00000009930	cadm2a	618.072	2.00896	0.000170108	223.707	1012.44
ENSDARG00000090945	si:ch211-170d8.8	90.1652	-2.78222	0.000170835	163.898	16.4328
ENSDARG00000088911	cbln17	20184.4	-1.78513	0.000170946	31826.9	8541.93
ENSDARG00000004218	rnd1b	32.8397	2.99623	0.00017291	4.5272	61.1521
ENSDARG00000056832	exo1	37.9456	3.43419	0.000173594	2.46149	73.4296
ENSDARG00000024204	mcm3	1711.24	2.32308	0.000177896	484.897	2937.58
ENSDARG00000117265	CR376741.3	1075.3	-1.78574	0.000181368	1696.01	454.589
ENSDARG00000077058	cela1.5	2831.71	-2.85864	0.000182307	5196.34	467.084
ENSDARG00000113707	si:ch211-113a14.19	101.312	2.62988	0.000182307	21.7561	180.868
ENSDARG00000071294	tonsl	97.2627	2.42871	0.000184573	25.1086	169.417
ENSDARG00000079269	CR589947.1	185.959	-2.37168	0.000184573	321.353	50.5643
ENSDARG00000100741	cdc20	349.721	2.5329	0.000191596	81.9531	617.489
ENSDARG00000093126	si:ch73-112l6.1	403.002	-2.00118	0.000193178	659.296	146.708
ENSDARG00000104293	mhc1zka	27.3224	3.74087	0.000193178	1.02291	53.6219
ENSDARG00000036155	gla	196.936	2.71899	0.000195247	37.8714	356.001
ENSDARG00000076913	eme1	41.6028	2.96706	0.000197047	6.06924	77.1364
ENSDARG00000075421	pttg1	221.624	2.44249	0.000204412	56.3256	386.922
ENSDARG00000020573	ddx3xa	4526.58	-1.71023	0.000206449	7044.4	2008.77
ENSDARG00000076856	frem2a	143.161	2.57436	0.000207338	32.0486	254.274
ENSDARG00000086790	gucy1b1	537.816	2.19678	0.000210303	168.214	907.418
ENSDARG00000088130	si:dkey-30c15.10	465.685	2.26018	0.000210303	138.543	792.827
ENSDARG00000092388	CU207217.1	38.978	-3.3689	0.000210303	75.2274	2.7286
ENSDARG00000103962	add1	475.258	2.31667	0.000210303	134.561	815.956
ENSDARG00000061257	C3H17orf75	125.692	2.69089	0.000217693	25.008	226.376
ENSDARG00000097392	BX465208.1	15.6187	3.6827	0.000219474	0	31.2373
ENSDARG00000071863	itgb1a	932.073	-1.67945	0.00022157	1442.56	421.582
ENSDARG00000090444	ponzr1	12878.7	-1.569	0.000224389	19518.8	6238.54
ENSDARG00000117514	LO018315.7	12.566	-3.64651	0.000226513	25.132	0
ENSDARG00000117786	CABZ01072848.1	17.2349	3.64718	0.000226724	0	34.4699
ENSDARG00000088589	ponzr3	114.023	-2.53259	0.000227393	201.468	26.5782
ENSDARG00000014017	rrm1	1550.42	1.69287	0.000227777	695.252	2405.58
ENSDARG00000016350	cap1	892.232	2.13124	0.000228433	293.783	1490.68
ENSDARG00000035665	si:dkey-267n13.1	88.6302	2.61525	0.000231948	19.0312	158.229
ENSDARG00000038574	scg2b	114.742	-3.09564	0.000233734	216.281	13.2017
ENSDARG00000076484	stab1	81.9322	2.72647	0.00023434	15.6825	148.182
ENSDARG00000078767	yeats2	141.171	2.24115	0.000238186	42.203	240.14
ENSDARG00000057392	lrrc31	131.196	1.93169	0.00024427	50.2008	212.192
ENSDARG00000014050	ngfb	189.984	-2.51539	0.000244721	335.089	44.8781
ENSDARG00000060500	l2hgdh	459.694	1.61116	0.000247641	216.892	702.496
ENSDARG00000102748	CABZ01074745.1	247.346	1.91036	0.000250662	95.9071	398.784
ENSDARG00000109978	taar20o	74.0501	-3.30932	0.000253348	142.806	5.29443
ENSDARG00000086552	hist1h2a11	38.1497	3.18265	0.000257414	3.89579	72.4036
ENSDARG00000023584	cdc7	123.755	2.58175	0.000257503	27.4013	220.108
ENSDARG00000004979	elovl5	573.024	2.02665	0.000260388	204.021	942.027
ENSDARG00000074915	etaa1	48.9792	2.90212	0.000262466	7.36007	90.5983
ENSDARG00000097976	CR812464.1	14.8553	3.64343	0.00026325	0	29.7106
ENSDARG00000055751	fosb	8269.23	-1.93315	0.000283378	13391.3	3147.15
ENSDARG00000076873	unm_hu7912	941.717	-1.67369	0.000293872	1456.69	426.744
ENSDARG00000007370	dysf	322.3	-2.52822	0.000294893	641.961	2.63843
ENSDARG00000021351	nefma	1178.59	2.27985	0.000294893	342.301	2014.89
ENSDARG00000100028	pole2	138.103	2.32279	0.000295013	38.9168	237.29
ENSDARG00000042133	si:dkey-51e6.1	3718.12	-2.26573	0.00029573	6343.77	1092.47
ENSDARG00000095427	FP101887.1	1166.61	-1.75763	0.000299407	1832.79	500.429
ENSDARG00000100002	ctbs	965.167	1.66877	0.000302785	438.474	1491.86
ENSDARG00000021250	slc25a48	215.458	2.11351	0.000304493	0.307686	430.607
ENSDARG00000109022	WDR70	99.5377	2.54974	0.00030469	22.2366	176.839
ENSDARG00000091211	adh8a	3992.34	-2.23976	0.000319982	6787.9	1196.78
ENSDARG00000036636	ebpl	343.087	2.93036	0.000322019	49.2375	636.937
ENSDARG00000045482	stk38l	215.548	2.01587	0.000322019	76.762	354.335
ENSDARG00000059287	mak	155.42	1.9854	0.000322441	56.774	254.066
ENSDARG00000038666	igfbp1b	2243.18	-2.06398	0.000323262	3712.75	773.607
ENSDARG00000010873	DDX17	2524.41	-1.91854	0.000330828	4079.83	968.991
ENSDARG00000098800	znf1156	888.903	-2.12627	0.000333207	1485.72	292.089
ENSDARG00000076590	atad2	368.253	2.05519	0.000336492	127.987	608.519
ENSDARG00000077130	bcl10	1608.42	-1.71723	0.000336587	2508.62	708.218
ENSDARG00000093120	si:dkey-117m1.4	504.354	1.7402	0.00034144	218.588	790.12
ENSDARG00000022303	higd1a	53557.8	-1.72578	0.000347687	83677.2	23438.5
ENSDARG00000094272	map3k19	207.148	-2.05236	0.000347687	342.182	72.1141
ENSDARG00000099412	bcan	59.2737	3.38746	0.000350902	3.03281	115.515
ENSDARG00000018587	zgc:152658	365.789	2.53049	0.000351821	83.7085	647.869
ENSDARG00000054749	lmo4b	1800.71	-1.60366	0.000352852	2749.58	851.827
ENSDARG00000103996	spdl1	146.929	2.70429	0.00035546	28.0605	265.797
ENSDARG00000078136	wdr47a	180.873	2.12203	0.000360366	59.173	302.573
ENSDARG00000005098	zgc:86764	54.0603	2.88578	0.000364536	8.21491	99.9058
ENSDARG00000099518	si:ch211-119e14.1	55.9629	-3.0274	0.000370995	105.163	6.76312
ENSDARG00000102127	NHLRC3	88.9627	2.18009	0.000370995	27.9335	149.992
ENSDARG00000079645	sc:d217	1890.23	-2.70775	0.000374953	3424.44	356.025
ENSDARG00000015355	fosl1a	88947.4	-1.55284	0.000376176	134497	43397.6
ENSDARG00000100161	CR382337.2	46.3876	3.43785	0.000393494	1.93783	90.8373
ENSDARG00000102442	folr	74.7594	2.21666	0.000394119	22.7354	126.783
ENSDARG00000058606	sik1	30269.6	-1.75079	0.00039418	47522.8	13016.4
ENSDARG00000092336	CU207311.1	101.135	-1.9528	0.00039418	164.452	37.817
ENSDARG00000045006	ptprga	1777.79	1.50442	0.000395004	892.806	2662.77
ENSDARG00000070145	magi1a	21.083	3.83869	0.000396465	0.307686	41.8582
ENSDARG00000058537	si:dkey-102c8.2	711.894	-1.8606	0.000400266	1139.77	284.015
ENSDARG00000010032	cmtm7	2377.21	-1.64771	0.000405083	3661.7	1092.71
ENSDARG00000098438	slc6a6b	700.887	2.63145	0.000416437	143.018	1258.76
ENSDARG00000019986	grhprb	1514.18	-2.14129	0.000422017	2539.22	489.153
ENSDARG00000037607	nol4lb	185.271	2.10712	0.000447013	61.6723	308.87
ENSDARG00000055868	rsl1d1	5325.22	-1.66775	0.000447468	8235.28	2415.16
ENSDARG00000101161	orc4	954.25	1.76336	0.000455014	406.721	1501.78
ENSDARG00000043137	cdca8	157.953	2.40479	0.00047105	40.6271	275.279
ENSDARG00000079784	si:ch211-235o23.1	100.738	2.05084	0.000471839	34.7505	166.725
ENSDARG00000099943	mapre2	128.742	2.14164	0.000480089	41.3233	216.161
ENSDARG00000115549	NCEH1	21.4126	3.56954	0.000480904	0.923059	41.9022
ENSDARG00000093622	spc24	248.758	2.17653	0.000487606	77.886	419.63
ENSDARG00000056804	si:dkey-40g16.6	872.17	2.13593	0.000489966	281.963	1462.38
ENSDARG00000040282	zgc:92590	9535.78	-1.97431	0.000490119	15575	3496.55
ENSDARG00000074663	zgc:162183	1600.56	-1.82229	0.000490119	2546.78	654.344
ENSDARG00000098068	CU207354.2	25.3315	-3.21118	0.000490119	48.5033	2.15978
ENSDARG00000096808	si:dkey-287g12.6	1193.08	-1.67086	0.000492172	1846.39	539.768
ENSDARG00000077004	aldh1l1	8747.92	-1.60822	0.000496721	13378.3	4117.58
ENSDARG00000037677	fgf24	78.4287	-2.83118	0.00049884	144.435	12.423
ENSDARG00000078815	grk5l	65.5632	2.45404	0.000501401	16.0625	115.064
ENSDARG00000001969	txlng	518.633	-1.66169	0.000505916	801.312	235.954
ENSDARG00000014427	mxe	2077.22	1.79201	0.000507037	866.691	3287.75
ENSDARG00000061268	ago2	92.0348	2.2445	0.00051161	26.9391	157.13
ENSDARG00000007045	cnot4a	241.998	1.73401	0.000524885	104.974	379.023
ENSDARG00000053159	zgc:110626	492.313	1.69219	0.000529711	219.594	765.031
ENSDARG00000095120	CU207311.2	188.653	-1.85824	0.000529711	302.227	75.0795
ENSDARG00000042094	eef2a.1	4441.46	-1.56497	0.000541234	6736.24	2146.67
ENSDARG00000078619	pnp5a	6399.6	-1.37127	0.000544881	9329.56	3469.64
ENSDARG00000053480	aqp9b	203.152	-2.52332	0.000545683	360.3	46.0045
ENSDARG00000101606	rims2a	73.9142	-3.1388	0.000549436	141.226	6.6022
ENSDARG00000045139	ca7	47.4966	-3.29479	0.000570049	92.5964	2.39687
ENSDARG00000093093	adam17b	284.621	2.23094	0.000570049	84.6688	484.574
ENSDARG00000045289	gpr137c	236.898	2.07639	0.000573873	80.1373	393.659
ENSDARG00000096578	cul4a	156.523	2.11787	0.000573873	51.1011	261.945
ENSDARG00000044098	egr2a	18620.2	-1.77193	0.000576031	29373.9	7866.52
ENSDARG00000040110	kif20bb	127.616	2.24574	0.000584732	37.5389	217.692
ENSDARG00000022372	kng1	7679.52	-1.47073	0.000588657	11431.3	3927.72
ENSDARG00000103840	lrrc8db	1070.94	-1.69963	0.000593096	1667.2	474.678
ENSDARG00000007421	ftcd	640.541	2.83049	0.000599326	98.8875	1182.19
ENSDARG00000068973	pdlim4	414.683	2.20403	0.000599326	125.803	703.564
ENSDARG00000094965	nfil3-5	682.36	-2.27479	0.000602315	1169.37	195.352
ENSDARG00000030417	pkd1a	101.761	2.48693	0.000603627	23.5789	179.942
ENSDARG00000067672	card9	109.852	-2.56701	0.000609652	196.006	23.6971
ENSDARG00000042874	phlda2	75072.7	-1.77713	0.000612866	118562	31583.6
ENSDARG00000038737	phf20b	2262.67	-1.43664	0.000648461	3344.94	1180.41
ENSDARG00000099006	CABZ01029938.1	3278.68	-2.6197	0.000648461	5896.95	660.416
ENSDARG00000099876	BX908401.1	163.49	-1.91217	0.000649373	264.411	62.5701
ENSDARG00000051729	nfatc3b	252.507	1.81847	0.000659098	103.339	401.675
ENSDARG00000091918	BX548073.1	29.4864	-2.90532	0.000659098	54.8272	4.14555
ENSDARG00000043640	cenpn	200.874	1.93705	0.000665441	75.3131	326.434
ENSDARG00000071554	CU929149.1	19.3683	3.43313	0.000665441	1.12276	37.6138
ENSDARG00000055253	slc12a10.3	31.3685	-3.04869	0.00069574	59.4056	3.33128
ENSDARG00000078492	swi5	373.862	1.6945	0.00069574	166.182	581.542
ENSDARG00000026834	cdr2l	116.73	2.11168	0.000698822	37.9593	195.501
ENSDARG00000051923	ccnb1	494.667	2.17996	0.000698822	153.143	836.191
ENSDARG00000052336	ociad2	971.79	-1.80265	0.000704665	1542.63	400.946
ENSDARG00000013360	sh3gl3a	2749.86	-1.51745	0.00071124	4133.61	1366.11
ENSDARG00000015228	ero1a	406.926	-1.67359	0.00071124	630.678	183.173
ENSDARG00000087446	mmd2a	145.761	2.16029	0.00071124	46.0807	245.441
ENSDARG00000094504	plekha1b	143.236	2.27898	0.00071124	40.3173	246.154
ENSDARG00000107912	FIG4	67.7495	2.13295	0.00071124	21.6447	113.854
ENSDARG00000097572	ptprt	31.771	2.93609	0.000711471	4.32321	59.2187
ENSDARG00000039616	cenpk	135.757	2.1479	0.000717503	43.1482	228.366
ENSDARG00000062947	amn	90.8872	2.26806	0.000717503	26.2388	155.536
ENSDARG00000090062	rac3a	69.9352	2.21997	0.000717503	20.6539	119.217
ENSDARG00000117653	CABZ01018269.1	34.0735	2.96944	0.000717503	4.18359	63.9633
ENSDARG00000042535	actc1a	120.463	2.14824	0.000718636	38.1112	202.815
ENSDARG00000111840	cxcl18a.1	1956	-1.78959	0.000718636	3097.81	814.199
ENSDARG00000075855	adgre10	11878.1	-1.49212	0.000723771	17765	5991.25
ENSDARG00000062262	ednrab	32.703	3.30873	0.000728381	1.84612	63.5599
ENSDARG00000074526	zbtb16b	1777.92	-1.52443	0.000730019	2676.69	879.15
ENSDARG00000086739	si:ch1073-513e17.1	63.6581	2.63214	0.000730019	12.4785	114.838
ENSDARG00000098465	si:ch73-366l1.5	118.214	2.47781	0.000730019	27.6816	208.747
ENSDARG00000103868	e2f1	12.5622	3.39888	0.000730019	0	25.1244
ENSDARG00000059601	map1aa	68.063	2.51338	0.00073461	15.1679	120.958
ENSDARG00000054968	cd40	298.039	1.79969	0.000741172	123.149	472.929
ENSDARG00000053558	rtkn2a	223.178	2.30788	0.000743028	61.4166	384.939
ENSDARG00000095865	oxr1a	73.4827	2.3929	0.000748362	18.5561	128.409
ENSDARG00000101019	ext1b	253.318	2.21005	0.000748413	75.9711	430.665
ENSDARG00000100892	cfap53	229.403	-1.70188	0.00076069	357.589	101.218
ENSDARG00000111536	si:ch211-113a14.19	91.9639	2.54909	0.000768436	20.018	163.91
ENSDARG00000060394	mtfr2	139.822	2.06307	0.000769679	47.6156	232.029
ENSDARG00000069381	si:ch211-125e6.5	28.5919	3.36931	0.000778386	1.39453	55.7893
ENSDARG00000104491	ampd2a	521.882	2.04595	0.00078597	179.246	864.518
ENSDARG00000028017	tp53inp1	800.101	1.49766	0.000793038	401.941	1198.26
ENSDARG00000094436	CR848723.1	11.537	3.39507	0.000793038	0	23.074
ENSDARG00000035954	tdp2b	331.976	1.57212	0.000804323	159.163	504.79
ENSDARG00000098108	dusp2	18062.5	-1.47717	0.000808055	26938.4	9186.53
ENSDARG00000098529	ccne2	141.092	2.20885	0.000808055	42.6763	239.507
ENSDARG00000035694	stm	178.79	2.23381	0.000811949	52.7893	304.792
ENSDARG00000040482	osbpl3b	332.17	-1.49468	0.000821905	497.107	167.232
ENSDARG00000031359	cmpk2	73.7249	2.27215	0.000828466	21.0528	126.397
ENSDARG00000057353	ehbp1l1a	1141.61	-1.8254	0.000833867	1820.56	462.651
ENSDARG00000103264	si:dkey-25g12.4	44.6731	-2.59779	0.000833867	80.2785	9.06779
ENSDARG00000061351	tfpi2	79.3475	2.24606	0.000848115	23.1901	135.505
ENSDARG00000074827	si:ch73-184c24.1	116.149	2.26491	0.000864634	33.2397	199.059
ENSDARG00000039900	si:ch73-168d20.1	162.827	1.99901	0.000867531	57.9921	267.662
ENSDARG00000007971	cks1b	583.933	1.91334	0.000869371	222.241	945.625
ENSDARG00000025043	trip13	65.5237	2.5152	0.000869371	14.5439	116.503
ENSDARG00000028793	nlk2	420.636	1.68593	0.000874213	187.135	654.137
ENSDARG00000111129	acy1	105.704	2.24293	0.000878299	30.6591	180.75
ENSDARG00000100487	nploc4	734.838	1.89325	0.000879096	283.213	1186.46
ENSDARG00000056214	gnrh3	14.9421	3.28169	0.000881297	0	29.8843
ENSDARG00000018319	arglu1b	2249.94	-1.38926	0.000888505	3295.25	1204.63
ENSDARG00000024654	pgm3	909.386	1.6707	0.000900983	408.915	1409.86
ENSDARG00000102917	CR388095.1	15.8032	-3.36901	0.000900983	30.7181	0.888314
ENSDARG00000088924	si:dkey-185e18.7	202.015	1.82104	0.000904677	81.9343	322.096
ENSDARG00000008703	apeh	254.993	2.01274	0.000922614	89.5244	420.461
ENSDARG00000007349	dmrt1	12.6331	3.32168	0.000936766	0	25.2663
ENSDARG00000013730	slc4a4a	24.0319	2.89637	0.000936766	3.23251	44.8312
ENSDARG00000103979	calr3a	17619.5	2.00507	0.000942752	6237.05	29001.9
ENSDARG00000045167	dlgap5	247.884	2.34876	0.000948551	65.2594	430.508
ENSDARG00000040841	adra2a	185.392	1.96612	0.000962993	67.5707	303.214
ENSDARG00000079049	cercam	206.188	1.89109	0.000962993	79.315	333.062
ENSDARG00000105321	aspscr1	545.751	1.49371	0.000987073	274.699	816.802
ENSDARG00000113800	si:dkey-108k21.19	45.3911	2.68466	0.000987281	8.31886	82.4634
ENSDARG00000013750	eno1b	1324.63	1.67303	0.000998404	594.258	2055
ENSDARG00000100252	capzb	4278.89	1.73436	0.00101648	1842.7	6715.08
ENSDARG00000008931	renbp	35.7672	2.7858	0.00102303	5.51419	66.0203
ENSDARG00000032769	slc38a9	789.193	1.58688	0.00103636	374.367	1204.02
ENSDARG00000030644	gnai3	270.465	1.57594	0.00104285	129.338	411.593
ENSDARG00000115299	si:ch211-227e10.3	442.278	-1.62663	0.00104437	680.161	204.395
ENSDARG00000067608	zswim7	131.474	2.02834	0.00104441	45.813	217.134
ENSDARG00000079688	tnrc6a	6573.59	-1.49748	0.00104441	9849.67	3297.51
ENSDARG00000000796	nr4a1	13171.6	-2.15062	0.00104556	22213.7	4129.56
ENSDARG00000036414	si:ch73-335l21.1	171.086	-2.22907	0.00104556	292.23	49.942
ENSDARG00000076829	ankib1b	624.065	1.5575	0.00105309	301.35	946.779
ENSDARG00000100163	tox4b	43.5745	2.63732	0.00105309	8.19527	78.9538
ENSDARG00000054332	trim66	273.612	-2.03338	0.00105906	452.649	94.5753
ENSDARG00000105507	zgc:112234	78.058	-1.8721	0.00105963	125.598	30.5175
ENSDARG00000018096	scap	578.207	2.3542	0.0010619	149.935	1006.48
ENSDARG00000016188	SBNO2	4700.29	-1.53487	0.00110526	7097.27	2303.3
ENSDARG00000016011	gpcpd1	535.229	1.91427	0.00110935	202.579	867.88
ENSDARG00000077353	rerea	838.678	2.08748	0.00110974	276.836	1400.52
ENSDARG00000083738	AL845550.1	50.6552	-2.08732	0.00111592	84.584	16.7264
ENSDARG00000005372	camk4	877.436	-1.56639	0.00113114	1333.36	421.508
ENSDARG00000097189	FP101861.1	301.841	2.10749	0.00113289	98.1262	505.555
ENSDARG00000009311	pvalb6	439.313	-1.85138	0.0011391	704.638	173.988
ENSDARG00000020676	dpp3	1757.96	2.18691	0.0011391	532.237	2983.67
ENSDARG00000036864	slc34a2b	1753.94	2.02375	0.00114129	609.195	2898.68
ENSDARG00000006848	parp9	1079.73	1.66275	0.00114431	487.204	1672.25
ENSDARG00000070416	zgc:162816	669.066	1.55066	0.00118305	324.263	1013.87
ENSDARG00000095092	si:ch211-232m8.3	168.286	-1.69894	0.0012345	262.35	74.2214
ENSDARG00000004059	galk2	489.08	1.72067	0.00123635	211.817	766.343
ENSDARG00000109390	si:ch211-66i15.5	84.6909	1.84235	0.00124679	0	169.382
ENSDARG00000029381	aldh3a2b	214.086	2.31953	0.00127222	56.8999	371.272
ENSDARG00000034624	nuf2	107.895	2.19212	0.00127281	32.5479	183.242
ENSDARG00000005163	efr3a	500.321	1.73012	0.00127283	215.17	785.472
ENSDARG00000021948	tnc	42.4954	2.99241	0.00127283	4.30761	80.6832
ENSDARG00000059581	mbd5	62.228	2.7257	0.00127283	10.3089	114.147
ENSDARG00000078094	lmf2a	63.5514	2.15971	0.00127283	19.8422	107.261
ENSDARG00000101084	CABZ01069184.1	1078.12	2.00859	0.00127283	377.953	1778.28
ENSDARG00000086585	nrg2b	41.8295	2.7187	0.00128677	6.99254	76.6664
ENSDARG00000092331	pimr136	63.1035	-2.47083	0.00130885	111.738	14.4691
ENSDARG00000001767	slc29a2	470.02	1.74381	0.00130965	200.438	739.602
ENSDARG00000061798	arhgap27l	628.643	-2.0949	0.00133154	1052.07	205.211
ENSDARG00000045935	immp1l	598.007	-1.49083	0.00134009	895.455	300.559
ENSDARG00000069402	lrrc4.1	33.3858	-3.07527	0.00135965	64.1846	2.58701
ENSDARG00000059046	psmd5	564.896	1.63713	0.00138772	258.534	871.258
ENSDARG00000070930	cart1	78.9321	-2.49429	0.00140256	140.494	17.3699
ENSDARG00000007278	ect2	103.231	2.68354	0.00140704	17.9041	188.558
ENSDARG00000011821	plod2	977.868	1.79548	0.00141375	402.118	1553.62
ENSDARG00000025468	bnip3la	203.011	1.91156	0.0014276	76.5456	329.476
ENSDARG00000098650	iqgap3	27.3344	3.02886	0.0014276	2.64516	52.0237
ENSDARG00000099091	CU929418.1	1211.21	-1.50931	0.0014276	1820.45	601.968
ENSDARG00000095777	si:ch211-218h8.3	54.5515	-2.28043	0.00142943	94.1033	14.9998
ENSDARG00000102418	enc2	277.514	1.87615	0.00142943	107.444	447.584
ENSDARG00000011065	camk2b1	1814.22	-1.55607	0.00143575	2752.96	875.475
ENSDARG00000103054	dnm2b	27.516	3.09965	0.00144872	2.1538	52.8783
ENSDARG00000105638	CT027989.1	14.64	3.45247	0.0014488	0.471472	28.8084
ENSDARG00000009610	rgs12a	81.1735	2.15599	0.00144963	25.0449	137.302
ENSDARG00000062152	chaf1a	510.748	2.04641	0.00146171	173.378	848.117
ENSDARG00000104231	opn9	587.001	-1.75957	0.00146171	926.545	247.457
ENSDARG00000007824	camta1b	35.3298	-2.30737	0.00146342	61.1646	9.49502
ENSDARG00000090785	diaph3	19.0761	3.40998	0.00146461	0.407537	37.7447
ENSDARG00000060323	exoc5	189.487	1.78485	0.001469	78.5024	300.471
ENSDARG00000098046	FP017161.1	203.326	-1.65461	0.00148651	314.714	91.9375
ENSDARG00000038076	romo1	31252.8	-1.75109	0.00148762	49261	13244.6
ENSDARG00000097816	si:dkey-117a8.1	31.939	2.76127	0.00148762	4.98264	58.8953
ENSDARG00000019367	tgfb3	327.842	2.02066	0.00150419	113.675	542.01
ENSDARG00000002304	gins2	480.253	2.17475	0.0015127	145.988	814.518
ENSDARG00000026348	csad	64.3978	2.64012	0.0015127	11.7352	117.06
ENSDARG00000040284	si:dkey-79d12.5	4265.93	-1.56219	0.0015127	6482.24	2049.62
ENSDARG00000079220	wdr20a	30.7962	2.45808	0.0015127	7.00044	54.592
ENSDARG00000098557	BX323564.1	384.276	-2.02283	0.0015127	635.779	132.772
ENSDARG00000063407	LO018340.1	113.017	2.12404	0.00151472	35.8051	190.229
ENSDARG00000053425	serinc2l	577.28	2.02517	0.00154297	198.759	955.802
ENSDARG00000095059	si:ch211-106h4.5	130.348	-1.69269	0.00154297	203.329	57.3669
ENSDARG00000095180	abr	138.654	2.15192	0.00154297	42.8896	234.418
ENSDARG00000045367	tuba1b	1159.64	1.92323	0.00156192	432.947	1886.33
ENSDARG00000069940	ppap2d	3069.07	1.63015	0.00158331	1410.57	4727.56
ENSDARG00000088178	tp53inp2	301.223	2.56535	0.00158331	60.496	541.95
ENSDARG00000076584	patz1	1759.95	-1.48691	0.00158974	2633.87	886.026
ENSDARG00000102643	chmp1a	617.392	1.46021	0.00161166	316.118	918.667
ENSDARG00000005176	zgc:101040	169.059	2.12622	0.00161215	53.677	284.441
ENSDARG00000021209	kctd9a	935.923	1.76136	0.00161334	393.066	1478.78
ENSDARG00000098959	CABZ01113771.1	66.1649	2.4699	0.00161334	14.884	117.446
ENSDARG00000070109	ncapg	232.577	2.03907	0.00162326	79.2358	385.917
ENSDARG00000099936	nlrc3l	109.291	2.37177	0.00162354	27.2427	191.34
ENSDARG00000101209	lamb1a	144.606	1.88936	0.00162354	55.5269	233.685
ENSDARG00000029372	rasa4	703.732	-1.4857	0.00163151	1052.82	354.647
ENSDARG00000102423	KYAT3	15.5147	3.46622	0.00163151	0.307686	30.7218
ENSDARG00000103763	l3hypdh	265.004	1.82483	0.00165829	106.496	423.513
ENSDARG00000034825	uspl1	1098.34	-1.45376	0.00166447	1632.67	564.014
ENSDARG00000075111	als2a	201.946	1.61168	0.00166447	93.9139	309.978
ENSDARG00000102594	zgc:194627	497.828	2.30027	0.00166447	133.818	861.837
ENSDARG00000058372	mcph1	10.4605	3.19183	0.00168048	0	20.9211
ENSDARG00000104128	snx2	266.26	2.34676	0.00168177	67.837	464.684
ENSDARG00000051736	hist1h2a4	29.3432	2.87384	0.00171395	3.75189	54.9345
ENSDARG00000086550	dbf4b	28.2137	2.72727	0.00171992	4.63879	51.7886
ENSDARG00000104370	esm1	200.113	2.74946	0.00171992	30.4459	369.78
ENSDARG00000099843	nedd4a	7075.17	-1.54961	0.00172475	10727.6	3422.74
ENSDARG00000071601	pvalb9	266.744	-2.28254	0.00174179	460.956	72.5328
ENSDARG00000114226	CABZ01102109.1	14.9471	-3.06062	0.00174415	28.5728	1.32145
ENSDARG00000075884	shprh	291.24	1.70104	0.00175136	127.335	455.145
ENSDARG00000103190	psmd2	727.759	2.41846	0.00175941	171.634	1283.88
ENSDARG00000004451	tnfrsfa	317.85	1.85714	0.00177037	124.028	511.672
ENSDARG00000008407	tspan7b	170.082	-1.90601	0.00177037	275.963	64.2006
ENSDARG00000031345	RTKN	115.167	2.26249	0.00177037	31.7265	198.607
ENSDARG00000044129	si:ch211-214p16.1	16.0986	-3.08064	0.00177037	30.8938	1.3033
ENSDARG00000079788	fam171a1	528.792	2.12465	0.00177037	166.329	891.255
ENSDARG00000097088	si:dkey-60d5.3	214.318	-1.61913	0.00177037	329.639	98.9977
ENSDARG00000079328	pgbd4	23.7214	2.83841	0.00178484	3.13266	44.3102
ENSDARG00000101627	ssr1	1857.18	1.90215	0.00180877	702.268	3012.08
ENSDARG00000034677	scel	10.3076	3.16746	0.00183291	0	20.6153
ENSDARG00000097873	BX530721.1	22.8767	-3.01269	0.0018397	43.7352	2.01819
ENSDARG00000042826	egr2b	5898.15	-1.79637	0.00185853	9384.12	2412.18
ENSDARG00000009001	pdia6	4922.37	1.89539	0.00186195	1869.92	7974.81
ENSDARG00000037894	ezh1	1936.35	-1.88754	0.00186195	3132.67	740.035
ENSDARG00000102710	CR848032.2	39.5665	-2.93019	0.00186195	75.0057	4.1274
ENSDARG00000090820	slc2a10	94.2665	1.97467	0.00186655	33.7985	154.735
ENSDARG00000037286	si:dkey-30k22.7	98.0326	2.24905	0.00189036	27.5612	168.504
ENSDARG00000077039	esama	387.959	1.53069	0.00189036	189.758	586.161
ENSDARG00000096045	si:ch73-263o4.4	106.52	1.77766	0.00189036	44.1198	168.919
ENSDARG00000017780	rorcb	433.277	-2.16958	0.00189066	735.529	131.025
ENSDARG00000102483	numa1	158.824	2.01793	0.00189539	54.8035	262.844
ENSDARG00000052876	CR933791.2	454.472	-1.99894	0.00190113	749.868	159.076
ENSDARG00000077090	si:ch211-127b11.1	17.829	-3.10997	0.00190113	34.4184	1.23964
ENSDARG00000100909	zgc:173581	274.517	1.92979	0.0019284	101.188	447.846
ENSDARG00000076376	tmem175	199.729	1.53587	0.00192967	97.3494	302.109
ENSDARG00000078652	zfyve1	22.4366	2.88192	0.00193554	2.66119	42.2119
ENSDARG00000053554	wdr76	153.857	1.76358	0.00196854	64.6326	243.082
ENSDARG00000005356	tyro3	149.384	1.84085	0.00197684	58.9243	239.844
ENSDARG00000069661	si:dkey-121j17.6	31.1109	2.95128	0.00198645	3.07686	59.1449
ENSDARG00000020718	slc25a22a	319.075	2.11545	0.00198923	100.979	537.17
ENSDARG00000098946	pald1a	89.5941	2.67305	0.00198923	14.9483	164.24
ENSDARG00000009724	rpn2	11542.1	1.45489	0.00201476	5914.65	17169.5
ENSDARG00000041802	rnf141	201.709	2.13086	0.00201476	62.6497	340.769
ENSDARG00000093574	si:ch73-256j6.4	99.0556	-1.90056	0.00201476	160.651	37.4604
ENSDARG00000097313	CR812470.2	11.8917	-3.36381	0.00202641	23.5419	0.241561
ENSDARG00000097528	si:dkey-7j14.5	30.6131	-2.47589	0.00202775	54.4922	6.734
ENSDARG00000086840	si:ch211-266k8.4	130.274	1.80525	0.00202927	52.9583	207.591
ENSDARG00000038321	zgc:172053	19.5882	3.23448	0.00205071	1.02291	38.1535
ENSDARG00000045372	ngdn	3014.6	-1.44265	0.00205071	4473.15	1556.05
ENSDARG00000071360	morn2	29.0763	2.99756	0.00205161	2.56134	55.5912
ENSDARG00000018559	kdm7ab	899.037	-1.40136	0.00205281	1322.22	475.853
ENSDARG00000067958	sh3gl1a	662.652	1.43798	0.0020947	342.999	982.305
ENSDARG00000074184	arhgap32b	347.997	2.14589	0.0020947	106.707	589.288
ENSDARG00000101406	rplp2	51976	-1.53184	0.00210322	78570.3	25381.7
ENSDARG00000037783	proza	4052.2	-1.70816	0.00212021	6344.09	1760.3
ENSDARG00000086057	plxnd1	16.689	3.3782	0.00214017	0.715223	32.6627
ENSDARG00000003046	sorbs2a	424.659	2.03138	0.00215018	144.096	705.222
ENSDARG00000104953	stt3a	8764.32	1.47112	0.00216997	4444.1	13084.6
ENSDARG00000077456	si:ch211-113a14.12	29.9012	2.63998	0.00220552	5.23428	54.568
ENSDARG00000086518	si:ch211-155o21.3	244.597	-1.99103	0.00223598	403.209	85.985
ENSDARG00000044755	GCNT4	619.881	1.92339	0.00223865	229.853	1009.91
ENSDARG00000078317	si:dkey-175m17.7	43.9149	2.53913	0.00224083	8.80226	79.0275
ENSDARG00000055683	pimr191	48.4009	-2.18101	0.00224246	82.4851	14.3167
ENSDARG00000078060	syt7b	24.8805	-2.87973	0.00224303	46.9402	2.8208
ENSDARG00000029905	phyhd1	1011.44	-1.59768	0.00224745	1549.76	473.114
ENSDARG00000100336	pik3r6a	3506.31	-1.63063	0.00224919	5407.86	1604.76
ENSDARG00000039150	lgmn	12618.3	1.40152	0.00227459	6672.99	18563.6
ENSDARG00000059701	flii	6354.38	-1.28479	0.00227459	9112.3	3596.45
ENSDARG00000061099	nfasca	285.467	-2.1015	0.00227459	479.847	91.0877
ENSDARG00000097789	pon3.2	1652.15	-1.77734	0.00227459	2621.68	682.623
ENSDARG00000103226	dhcr7	2896.41	1.68503	0.00227459	1276.97	4515.84
ENSDARG00000018342	ggt1b	415.133	1.43426	0.00229811	214.991	615.276
ENSDARG00000058259	celsr1b	1937.06	-1.46072	0.00230188	2886.13	987.991
ENSDARG00000009978	icn	351371	-1.80275	0.00232896	560277	142465
ENSDARG00000077815	cdc26	1949.38	-1.50997	0.00233462	2934.62	964.146
ENSDARG00000019278	GNB4	93.955	2.36626	0.00233824	23.0632	164.847
ENSDARG00000067850	jund	22606.5	-1.54359	0.00233824	34266.6	10946.4
ENSDARG00000030786	mpi	199.171	2.04306	0.00234049	66.5716	331.77
ENSDARG00000051748	ccnd2a	2605.19	1.41847	0.0023593	1363.43	3846.96
ENSDARG00000076773	lrrc58a	951.953	1.66258	0.00236434	426.003	1477.9
ENSDARG00000037046	rad51b	82.4572	2.24046	0.00236953	22.788	142.126
ENSDARG00000086034	nectin1b	1753.27	1.57608	0.00236953	831.073	2675.46
ENSDARG00000104681	si:dkeyp-87d1.1	40.7497	-2.9272	0.00236953	77.8006	3.69873
ENSDARG00000092918	crhr2	179.982	-2.41283	0.00237251	318.123	41.8413
ENSDARG00000099023	CABZ01034698.1	36.9018	-2.43535	0.00239083	65.3483	8.45532
ENSDARG00000095949	si:dkey-22i16.9	402.025	-2.103	0.00242456	676.223	127.827
ENSDARG00000006029	lta4h	190.167	2.12503	0.00244395	58.8741	321.461
ENSDARG00000097480	si:dkey-263j23.1	748.187	-1.55777	0.00244395	1137.7	358.678
ENSDARG00000004246	slit2	117.347	-1.91317	0.00246067	190.931	43.7621
ENSDARG00000033361	asl	1564.27	1.6365	0.00249728	711.765	2416.77
ENSDARG00000015866	apoa2	21001.1	-1.94164	0.00250482	34360.4	7641.89
ENSDARG00000060987	C25H12orf4	185.397	1.64124	0.00250482	83.9135	286.881
ENSDARG00000105117	sdad1	2090.36	-1.2472	0.00251397	2972.94	1207.78
ENSDARG00000102540	CR450832.1	201.26	-2.02936	0.00254017	334.26	68.2596
ENSDARG00000077519	si:dkey-6f10.4	79.5231	-2.071	0.00255697	133.037	26.0094
ENSDARG00000036999	DISP3	12.0132	2.99191	0.00258598	0	24.0264
ENSDARG00000054272	caprin1b	12230	-1.46324	0.00258748	18236.8	6223.24
ENSDARG00000076544	aldh5a1	216.256	1.71228	0.00260884	93.2186	339.294
ENSDARG00000025024	pnoca	37.8578	-2.80988	0.00265257	71.0173	4.69825
ENSDARG00000094977	si:ch211-156j22.4	155.056	1.91601	0.00266235	57.6165	252.495
ENSDARG00000070844	gamt	4430.38	-1.76806	0.0026789	7022.97	1837.79
ENSDARG00000100429	irgf4	61.1454	2.32254	0.00267918	15.6708	106.62
ENSDARG00000093629	si:ch211-106h4.4	26.6335	-2.75168	0.00269536	49.5487	3.71832
ENSDARG00000042627	nhsl1b	659.75	1.56994	0.00272647	313.558	1005.94
ENSDARG00000018976	sptlc2a	902.602	1.30598	0.00274256	504.155	1301.05
ENSDARG00000027689	pold1	804.903	1.3753	0.00276763	431.715	1178.09
ENSDARG00000101181	s100w	3678.93	-2.22156	0.00278074	6318	1039.87
ENSDARG00000010701	crygs4	32.77	-2.89717	0.00278724	62.4063	3.1338
ENSDARG00000039579	cfd	503.449	-2.58923	0.00279104	915.8	91.0976
ENSDARG00000052176	shfl	123.849	2.00025	0.00279104	42.7334	204.965
ENSDARG00000090598	pkp1a	17.8408	3.14272	0.00279104	1.08684	34.5948
ENSDARG00000095369	zgc:112966	142.382	-1.8438	0.00279104	229.047	55.7165
ENSDARG00000045262	gsnb	288.402	1.71958	0.00279479	123.761	453.044
ENSDARG00000100480	si:ch73-364h19.2	41.3418	2.19592	0.00279563	11.8353	70.8484
ENSDARG00000004111	esr1	51.1719	-2.02575	0.00279755	84.9441	17.3997
ENSDARG00000017665	snrkb	520.632	1.81382	0.00279928	208.914	832.351
ENSDARG00000044437	cdca5	190.8	1.87772	0.00279928	73.143	308.457
ENSDARG00000116713	si:ch73-265d7.2	17.7292	-2.84422	0.00279928	33.3485	2.1098
ENSDARG00000023927	dnajc24	479.428	-1.29558	0.0028048	689.494	269.361
ENSDARG00000097878	CU694532.1	192.694	2.37695	0.00282676	46.3001	339.087
ENSDARG00000018623	rad54l	110.428	2.31796	0.00287085	28.2204	192.636
ENSDARG00000030872	cetp	213.874	-1.89702	0.00287445	347.523	80.2261
ENSDARG00000042396	odf3b	49.15	-2.92863	0.00287445	94.8006	3.49939
ENSDARG00000001870	atp1a1a.4	5143.25	1.71808	0.00289301	2208.55	8077.95
ENSDARG00000075670	rereb	524.121	1.51448	0.00294419	258.108	790.133
ENSDARG00000052074	si:ch211-122f10.4	601.684	1.50439	0.00295597	297.969	905.4
ENSDARG00000029112	gem	310.021	-1.50757	0.00296247	466.697	153.345
ENSDARG00000001558	kifc1	345.462	2.07665	0.00305059	111.532	579.391
ENSDARG00000095192	BX957317.1	126.147	-1.68119	0.00305059	196.649	55.6439
ENSDARG00000095991	AL935166.1	69.8116	-1.94606	0.00305059	114.503	25.1207
ENSDARG00000016213	zmp:0000001048	18.5845	2.99337	0.00308532	1.59423	35.5747
ENSDARG00000027552	mapk1	771.733	1.46613	0.00308532	391.178	1152.29
ENSDARG00000031049	igsf21a	52.6848	-2.68756	0.00308532	97.302	8.06769
ENSDARG00000042948	dnajc5aa	103.66	1.77065	0.00308532	42.5981	164.722
ENSDARG00000046087	brd2b	80.4092	2.04197	0.00308532	26.5114	134.307
ENSDARG00000057671	epas1b	485.273	-1.4853	0.00308532	727.408	243.137
ENSDARG00000089862	si:dkey-16j16.4	120.091	2.00477	0.00308532	41.339	198.844
ENSDARG00000015566	dnmt3ab	1951.43	-1.60908	0.00310916	3000.49	902.374
ENSDARG00000055498	si:ch1073-184j22.1	189.587	-1.75981	0.0031094	300.411	78.7639
ENSDARG00000061901	ankrd13a	283.645	1.57061	0.0031094	134.769	432.521
ENSDARG00000105631	CABP4	15.7216	3.11511	0.0031094	1.02291	30.4203
ENSDARG00000117493	BX511218.1	129.035	-1.79273	0.00311101	205.736	52.3337
ENSDARG00000015374	st3gal3a	841.777	1.30628	0.00313314	469.624	1213.93
ENSDARG00000093374	EPB41L2	278.836	1.86174	0.00313314	107.32	450.352
ENSDARG00000094097	CR936321.5	1317.69	-1.34813	0.00313314	1917.7	717.68
ENSDARG00000104451	slc39a7	5655.27	1.3443	0.00313314	3086.94	8223.61
ENSDARG00000105464	si:ch211-285c6.6	152.252	2.01068	0.00313314	51.8	252.704
ENSDARG00000068406	six5	573.057	1.62432	0.0031601	262.267	883.847
ENSDARG00000101928	gorasp1b	23.5437	2.92279	0.00317509	2.1538	44.9335
ENSDARG00000103148	nectin4b	249.3	1.59672	0.00317509	116.062	382.539
ENSDARG00000059908	si:ch211-217k17.7	4591.74	-1.52846	0.0031854	6945.59	2237.88
ENSDARG00000091937	BX927308.1	1438.2	-1.38027	0.00319633	2107.85	768.549
ENSDARG00000010752	acsl4b	774.385	-1.31893	0.00322015	1119.89	428.879
ENSDARG00000001249	pcgf1	636.325	-1.35485	0.0032271	927.599	345.05
ENSDARG00000077653	rabl6b	588.904	1.51203	0.0032271	289.752	888.055
ENSDARG00000087206	cct2	244.834	2.33634	0.0032271	60.5081	429.16
ENSDARG00000018891	rnaseh2a	1101.94	1.2855	0.00323941	622.431	1581.46
ENSDARG00000003938	rpa1	2890.15	1.4751	0.00325665	1456.52	4323.78
ENSDARG00000016531	klhl4	96.8311	1.96498	0.00325665	34.0836	159.579
ENSDARG00000036245	wipf3	235.315	1.98395	0.00325665	82.3249	388.306
ENSDARG00000095789	ccr8.1	1003.74	1.40529	0.0033252	528.351	1479.13
ENSDARG00000019516	sp7	39.7297	-2.6488	0.00338564	73.0503	6.40919
ENSDARG00000075726	dhrs7b	268.724	1.66648	0.00338984	119.202	418.245
ENSDARG00000016304	tfdp1b	570.23	1.28959	0.00339489	321.15	819.309
ENSDARG00000041108	ctsh	6456.7	1.41653	0.00339489	3373.33	9540.06
ENSDARG00000098881	si:dkey-238i5.3	29.2192	2.46879	0.00339489	6.08551	52.3529
ENSDARG00000099653	PSMD2	1482.7	1.92627	0.00343651	541.281	2424.12
ENSDARG00000103663	NINJ1	101.909	1.74015	0.00343799	43.029	160.788
ENSDARG00000036162	hnrnpa0b	9617.77	-1.43587	0.00345482	14270.1	4965.46
ENSDARG00000060510	cul4b	5052.73	-1.62476	0.00345725	7797.1	2308.35
ENSDARG00000010603	kctd9b	168.494	1.80094	0.00345811	67.5718	269.415
ENSDARG00000104306	UBR1	232.184	1.85658	0.00346128	89.5353	374.833
ENSDARG00000007371	slc26a3.1	196.701	2.60138	0.00347433	33.5731	359.829
ENSDARG00000070396	serpinb1l2	229.935	-1.66203	0.00347433	357.379	102.491
ENSDARG00000031372	efna2a	230.422	-1.90672	0.00347794	375.351	85.4933
ENSDARG00000074656	ctss2.1	1542.32	1.81163	0.00347794	615.898	2468.75
ENSDARG00000078864	lats2	270.011	2.08997	0.00347946	85.2335	454.788
ENSDARG00000067913	ints9	325.111	1.54052	0.00348678	156.803	493.419
ENSDARG00000103025	hmgcs1	3425.8	2.32479	0.00348678	853.986	5997.61
ENSDARG00000056034	pip4p2	81.9565	2.10885	0.00348993	25.3092	138.604
ENSDARG00000071164	alkbh1	439.699	-1.56731	0.00348993	670.767	208.631
ENSDARG00000059931	hyal2a	37.5192	2.43511	0.00352914	8.32675	66.7115
ENSDARG00000009839	fam117bb	247.836	1.81	0.00355293	98.9896	396.683
ENSDARG00000103754	aspm	239.317	2.41261	0.00355293	53.7516	424.883
ENSDARG00000099273	zgc:103508	533.774	1.55103	0.0035638	255.785	811.762
ENSDARG00000063908	mt-co2	546354	-1.36416	0.00361929	798245	294464
ENSDARG00000088899	ralgapb	226.092	1.96068	0.00361929	79.8467	372.337
ENSDARG00000112301	CU570881.2	484.738	-1.42984	0.00361929	718.583	250.894
ENSDARG00000001857	aff4	271.429	1.96653	0.0036295	95.478	447.381
ENSDARG00000104882	FP085399.5	17.1488	-2.9117	0.0036295	33.9742	0.323376
ENSDARG00000007523	kmt2e	2239.04	-1.60984	0.00369675	3445.68	1032.39
ENSDARG00000052958	nppb	42.1524	-2.62408	0.00370154	77.4331	6.87171
ENSDARG00000015879	pax8	9.199	2.95728	0.00372125	0	18.398
ENSDARG00000060094	ptgis	2111.14	-1.53293	0.00372719	3198.3	1023.97
ENSDARG00000044002	cyp2x7	142.038	2.11997	0.0037346	43.3657	240.711
ENSDARG00000104573	slc12a2	709.858	-1.29224	0.0037346	1020.71	399.003
ENSDARG00000027065	slc38a3a	36.8735	2.49334	0.00374055	7.40008	66.347
ENSDARG00000035629	parvab	1552.78	1.32127	0.00376641	857.955	2247.6
ENSDARG00000077029	bub1	35.9366	2.73345	0.00376684	4.76281	67.1103
ENSDARG00000029259	zgc:136493	774.366	1.39482	0.00378598	409.844	1138.89
ENSDARG00000075444	cgref1	488.588	1.52694	0.0037929	237.985	739.191
ENSDARG00000117133	cst14b.1	48.1682	2.0439	0.0037929	15.8027	80.5337
ENSDARG00000002795	meis3	93.7544	2.05637	0.00379767	30.6539	156.855
ENSDARG00000005454	tacc3	154.377	2.46816	0.00381363	31.9924	276.762
ENSDARG00000021896	asap3	3564.48	-1.22375	0.00381363	5046.57	2082.39
ENSDARG00000018361	sult1st3	3985.95	-1.96717	0.00382363	6570.17	1401.72
ENSDARG00000067976	ar	90.1226	1.7202	0.00383451	38.4979	141.747
ENSDARG00000079932	zgc:152830	3286.74	1.25653	0.00384092	1885	4688.49
ENSDARG00000011673	si:ch211-246m6.5	8.78921	2.95757	0.0038482	0	17.5784
ENSDARG00000058903	GPR161	34.7412	2.65052	0.0038545	5.45411	64.0284
ENSDARG00000025220	sppl3	785.806	1.42966	0.00387648	406.785	1164.83
ENSDARG00000025904	tecrb	5560.77	1.19119	0.00387648	3307.82	7813.72
ENSDARG00000063390	pvrl2l	350.023	2.10875	0.00387648	108.118	591.927
ENSDARG00000089232	prr14	1331.82	-1.29952	0.00387648	1918.48	745.169
ENSDARG00000096462	BX571664.1	8.70279	2.95689	0.00387648	0	17.4056
ENSDARG00000053323	zgc:112285	554.768	1.67004	0.00388452	245.423	864.113
ENSDARG00000117671	BX663525.2	34.7118	2.36027	0.00392651	8.13133	61.2922
ENSDARG00000025285	panx1a	205.19	2.07247	0.00393496	65.8437	344.536
ENSDARG00000053005	cd22	98.9131	-2.42101	0.00393496	176.078	21.7485
ENSDARG00000092550	si:dkey-85a20.4	143.886	-1.59165	0.0039426	220.557	67.2155
ENSDARG00000036171	rnasel3	11214.2	-1.62025	0.00395414	17300.1	5128.35
ENSDARG00000075821	plxnb1a	756.616	-1.66013	0.00396108	1176.48	336.747
ENSDARG00000006370	atp6v1h	2731.6	1.18418	0.00397888	1630.88	3832.33
ENSDARG00000103618	btr18	216.243	1.55926	0.00401289	102.725	329.761
ENSDARG00000095288	rusc2	2303.23	-1.48475	0.00406324	3455.06	1151.41
ENSDARG00000010948	kif11	151.207	2.36503	0.0040933	35.5602	266.854
ENSDARG00000071103	si:dkey-222p3.1	144.403	-1.81084	0.00409614	231.368	57.4372
ENSDARG00000001825	cfap43	12.5794	3.11722	0.00411896	0.471472	24.6874
ENSDARG00000006345	med17	134.374	2.10464	0.00411896	41.5915	227.156
ENSDARG00000075621	birc5a	388.27	1.72256	0.00411896	165.356	611.185
ENSDARG00000042057	trmt1l	417.923	1.31522	0.0041263	231.464	604.381
ENSDARG00000075859	mcf2la	657.786	1.37942	0.0041263	351.105	964.467
ENSDARG00000097946	CR354430.3	304.046	-1.52855	0.0041263	460.524	147.568
ENSDARG00000104727	ino80da	50.9465	2.46331	0.00413198	10.4887	91.4042
ENSDARG00000076673	dspb	390.308	1.64326	0.00418319	175.584	605.031
ENSDARG00000017034	sqor	3089.79	1.36902	0.0041846	1658.63	4520.94
ENSDARG00000093583	FP236157.1	214.946	-1.98221	0.00418567	355.586	74.3055
ENSDARG00000077571	zgc:174862	806.012	-1.66706	0.00420002	1255.65	356.373
ENSDARG00000102975	nsg2	142.366	-2.46406	0.00420362	255.546	29.1867
ENSDARG00000027428	rpp30	619.926	-1.46171	0.0042097	925.678	314.174
ENSDARG00000073917	b3glcta	740.942	1.39503	0.00421186	391.309	1090.58
ENSDARG00000096918	AL954322.1	238.639	-1.55706	0.00421233	363.658	113.62
ENSDARG00000095940	si:dkey-19a16.12	12.3541	3.1328	0.00424529	0.407537	24.3008
ENSDARG00000094318	BX322647.1	47.1975	-2.06705	0.00427696	79.3403	15.0548
ENSDARG00000069438	neurl1aa	1316.57	1.70764	0.00438196	565.286	2067.85
ENSDARG00000098386	ctps1b	200.781	1.77546	0.00440537	82.1688	319.393
ENSDARG00000089463	dhx58	327.345	1.80432	0.00442871	130.465	524.225
ENSDARG00000011672	sema3b	425.494	1.6764	0.00444995	186.544	664.444
ENSDARG00000020328	plekha6	2785.66	-1.37966	0.00444995	4086.42	1484.9
ENSDARG00000079175	si:ch211-79k12.1	3822.51	-1.44933	0.00447473	5693.13	1951.89
ENSDARG00000101759	homer1b	148.083	-2.0503	0.00447473	248.004	48.1625
ENSDARG00000117675	CABZ01016692.1	48.7676	-2.01065	0.00447473	81.1548	16.3804
ENSDARG00000097456	coa3b	1084.69	-1.24369	0.00455415	1543.39	625.995
ENSDARG00000013845	ttc14	1260.68	-1.38579	0.0045729	1851.95	669.409
ENSDARG00000013128	pdk1	162.92	1.7937	0.00457418	65.2185	260.622
ENSDARG00000092067	atn1	27.0125	-2.74717	0.00457557	50.799	3.22599
ENSDARG00000093570	si:dkey-25o1.7	150.734	-2.00628	0.00457557	250.536	50.932
ENSDARG00000097752	si:rp71-77l1.2	203.082	2.42639	0.00460404	43.4641	362.7
ENSDARG00000069105	fgfr4	1754.97	-1.54475	0.00461061	2667.55	842.381
ENSDARG00000096103	CU326364.1	22.4613	-2.44957	0.00461575	40.2161	4.7066
ENSDARG00000103457	spartb	548.905	-1.42732	0.00461575	813.632	284.177
ENSDARG00000069264	si:ch211-196h16.5	444.759	-1.25747	0.00463112	634.836	254.681
ENSDARG00000035832	pyyb	337.633	-1.78693	0.00467605	538.855	136.411
ENSDARG00000078388	glis2a	853.593	-1.53004	0.00470174	1293.55	413.638
ENSDARG00000100304	chdh	139.459	1.96554	0.00470417	48.8308	230.087
ENSDARG00000110240	kctd14	962.941	-1.45665	0.0047334	1436.72	489.165
ENSDARG00000069048	serpinf1	1002.55	-1.99977	0.00475002	1664.94	340.157
ENSDARG00000100376	amdhd2	1155.6	1.32644	0.00478231	635.459	1675.74
ENSDARG00000103825	galnt10	44.0067	2.42921	0.00480459	9.20619	78.8072
ENSDARG00000015065	c4	1048.26	-1.77611	0.00482657	1669.67	426.847
ENSDARG00000093773	si:ch1073-296i8.2	45.6028	2.62871	0.00482657	6.86895	84.3367
ENSDARG00000000229	usp49	286.881	-1.4384	0.00482797	426.201	147.561
ENSDARG00000069917	ska3	143.198	1.70895	0.00482923	61.3882	225.007
ENSDARG00000036840	krt15	445.711	-2.09992	0.00485132	753.896	137.527
ENSDARG00000061057	cyhr1	241.394	1.55944	0.00485132	114.405	368.382
ENSDARG00000111423	si:ch73-27e22.1	744.604	-2.22657	0.00485132	1287.2	202.007
ENSDARG00000036848	slc43a2a	112.446	2.05783	0.00485217	35.8976	188.995
ENSDARG00000105444	hist1h2a11	37.8181	2.54852	0.00485217	6.79645	68.8398
ENSDARG00000068759	si:ch211-244o22.2	202.058	2.20215	0.00493848	56.2051	347.911
ENSDARG00000002937	meis1a	76.0141	-1.95487	0.00494526	125.258	26.7702
ENSDARG00000005578	ugp2a	126.984	2.34041	0.00494526	30.0799	223.889
ENSDARG00000075793	prex1	62.3178	-2.0674	0.00494526	104.78	19.8557
ENSDARG00000042793	tpp1	1162.24	1.3584	0.00498181	626.918	1697.56
ENSDARG00000090975	si:dkey-62k3.5	21.8022	-2.51894	0.00502281	39.5043	4.10004
ENSDARG00000077265	wdr89	194.334	-1.58684	0.00502978	297.989	90.6796
ENSDARG00000052142	acvr1bb	36.689	2.39174	0.00512597	8.1153	65.2626
ENSDARG00000110160	SBSPON	438.758	1.81831	0.005147	172.836	704.681
ENSDARG00000000631	ptpn4a	1604.11	-1.36315	0.00515863	2345.6	862.621
ENSDARG00000043175	cela1.1	4509.44	-1.51954	0.00518065	6821.04	2197.83
ENSDARG00000100792	zgc:154142	777.758	2.00128	0.00518065	262.725	1292.79
ENSDARG00000018637	sec61g	37021.1	-1.4896	0.00518187	55643.1	18399.2
ENSDARG00000058740	ube2r2	215.345	1.52275	0.00519028	104.571	326.119
ENSDARG00000060977	zgc:153018	1344.23	-1.43124	0.00519028	1995.33	693.134
ENSDARG00000071449	fam234a	354.955	1.55045	0.00519721	169.181	540.728
ENSDARG00000106529	dut	932.587	1.4629	0.00521453	471.422	1393.75
ENSDARG00000087306	CABZ01038521.1	444.871	1.63078	0.00522762	200.702	689.041
ENSDARG00000079124	MTERF4	764.078	-1.25293	0.00528392	1089.98	438.174
ENSDARG00000099534	CABZ01066926.1	93.5164	2.40113	0.00528392	20.1989	166.834
ENSDARG00000076127	gabrb1	21.3925	-2.54137	0.00531813	38.9447	3.84033
ENSDARG00000102424	ARHGAP44	11.6187	3.11054	0.00533032	0.307686	22.9298
ENSDARG00000055792	foxo4	3073.53	-1.63973	0.00533541	4766.92	1380.13
ENSDARG00000002336	dlc	2541.53	-1.3777	0.00534837	3728.77	1354.29
ENSDARG00000016477	eif4a2	4028.09	-1.16582	0.00536512	5630.23	2425.95
ENSDARG00000029720	si:dkeyp-9d4.2	494.967	1.87712	0.00536512	185.589	804.345
ENSDARG00000058990	slc35a2	87.0157	1.99005	0.00538029	29.3249	144.707
ENSDARG00000103697	arnt2	1253.66	-1.55396	0.00538029	1910.48	596.844
ENSDARG00000055490	galnt12	119.549	1.92385	0.00541067	42.7906	196.308
ENSDARG00000060734	hesx1	301.906	1.37425	0.00542565	161.208	442.604
ENSDARG00000063300	CU655845.1	274.464	2.22113	0.00542565	74.4656	474.462
ENSDARG00000088157	smoc2	25.2065	-2.81666	0.00542565	48.4493	1.96373
ENSDARG00000075021	fam120a	6059.77	-1.50451	0.00542572	9138.61	2980.94
ENSDARG00000101665	pcdh1g11	803.343	-1.76954	0.00543167	1278.73	327.96
ENSDARG00000070743	tmem45a	72.2601	2.3594	0.00547222	16.5938	127.926
ENSDARG00000040944	ntd5	145.574	-2.14509	0.00550868	248.583	42.5654
ENSDARG00000101234	nsmfb	88.3488	-1.98008	0.00551485	146.221	30.4763
ENSDARG00000007184	zbtb16a	231.089	-1.76286	0.00557045	367.37	94.807
ENSDARG00000030756	dnmt1	935.891	1.39708	0.00557045	492.417	1379.37
ENSDARG00000060153	h6pd	1292.06	-1.24734	0.00557045	1840.75	743.382
ENSDARG00000102733	EMC4	613.018	1.61761	0.00557338	279.381	946.654
ENSDARG00000028087	aldh2.2	3370.04	1.33121	0.00558364	1846.07	4894.01
ENSDARG00000083699	CT027646.4	134.201	-1.78123	0.00558364	214.122	54.2788
ENSDARG00000102953	ints4	123.118	1.75829	0.00559331	50.7408	195.495
ENSDARG00000075024	si:ch73-375g18.1	3104.25	-1.26038	0.00559601	4435.97	1772.53
ENSDARG00000105465	BX005228.2	1349.73	-1.59843	0.00559601	2076.27	623.194
ENSDARG00000063570	dyrk1aa	361.856	2.14114	0.00561664	106.447	617.265
ENSDARG00000009568	ca10b	329.381	-1.26372	0.00565513	471.05	187.713
ENSDARG00000007975	fth1b	337.167	1.40764	0.00567222	176.243	498.092
ENSDARG00000003200	foxm1	93.6798	2.39583	0.00568163	20.3412	167.018
ENSDARG00000116863	CU984579.1	71.6696	1.7528	0.00570944	29.4959	113.843
ENSDARG00000097746	si:rp71-77l1.1	29119.9	-1.39937	0.00572292	42936.9	15302.9
ENSDARG00000117240	CABZ01083943.1	1575.25	-1.50417	0.00572508	2375.99	774.52
ENSDARG00000060041	lig1	1340.77	1.54618	0.00574009	641.083	2040.47
ENSDARG00000070455	tmem245	944.068	-1.40048	0.00574958	1392.27	495.862
ENSDARG00000012581	AL590149.1	5529.28	-1.41957	0.00579099	8189.32	2869.23
ENSDARG00000009942	cdc6	317.934	1.44224	0.00580332	162.812	473.055
ENSDARG00000093484	si:dkey-95p16.2	286.313	-1.41466	0.00580332	423.502	149.123
ENSDARG00000004131	rttn	84.5104	1.66499	0.0058041	37.1792	131.842
ENSDARG00000058488	adora2ab	47.1067	2.25484	0.0058041	12.127	82.0864
ENSDARG00000071558	fblim1	1580.24	1.51678	0.0058041	770.782	2389.71
ENSDARG00000097608	CU929312.1	59.1734	-2.2083	0.0058041	102.163	16.1835
ENSDARG00000006712	wipf2b	1395.09	-1.43701	0.00581325	2074.15	716.037
ENSDARG00000086786	mfsd10	567.671	1.66021	0.00582812	250.579	884.762
ENSDARG00000002021	pygb	926.4	1.2983	0.00584888	517.32	1335.48
ENSDARG00000100452	nop53	12391.2	-1.52403	0.00586511	18771.5	6010.92
ENSDARG00000030094	malb	373.376	2.32942	0.00590576	88.1055	658.646
ENSDARG00000075156	tbc1d4	132.403	1.65337	0.00594211	59.019	205.787
ENSDARG00000111824	si:dkey-199m13.7	42.256	2.09731	0.00594258	13.1016	71.4104
ENSDARG00000088187	CR381544.1	227.419	1.55744	0.0059489	107.561	347.278
ENSDARG00000109717	SLC35E2B	159.582	1.87461	0.00595379	59.4284	259.735
ENSDARG00000094284	si:dkey-58f10.10	306.629	1.79305	0.00599673	122.262	490.997
ENSDARG00000019963	sfxn1	140.528	1.8339	0.00600893	54.0821	226.973
ENSDARG00000052300	zgc:171489	19.9283	2.67021	0.00601813	2.66119	37.1954
ENSDARG00000088908	CU570691.1	269.318	1.87989	0.0060193	100.272	438.364
ENSDARG00000002956	si:dkey-32n7.4	130.2	-1.69824	0.00602898	204.645	55.7547
ENSDARG00000078825	bub1ba	83.8398	2.02253	0.00602898	27.4936	140.186
ENSDARG00000078433	spc25	369.103	1.87951	0.00604404	137.742	600.463
ENSDARG00000045011	tapbp.2	994.238	1.50986	0.00605174	486.454	1502.02
ENSDARG00000104719	abcc1	671.391	-1.46175	0.0060566	1003.78	339.006
ENSDARG00000035400	btf3	74269.4	-1.55205	0.00607383	113197	35341.5
ENSDARG00000101495	ugt5b2	2807.03	-1.66934	0.00608006	4383.43	1230.63
ENSDARG00000020298	btg2	136837	-1.42892	0.00611393	203129	70544.7
ENSDARG00000002213	invs	165.109	1.58309	0.00612956	76.6976	253.52
ENSDARG00000042458	rfc4	997.894	1.32967	0.00613068	546.813	1448.98
ENSDARG00000045676	calua	2784.81	1.48236	0.00613747	1386.98	4182.64
ENSDARG00000015860	mtmr9	211.294	1.54347	0.00613992	100.875	321.712
ENSDARG00000030781	acads	1981.88	1.21538	0.00617569	1160.22	2803.54
ENSDARG00000043757	ptbp3	3371.93	1.51195	0.00618395	1647.64	5096.22
ENSDARG00000008247	vezf1a	136.812	2.08706	0.0062087	42.258	231.367
ENSDARG00000104141	si:dkey-262j3.7	209.697	-1.56981	0.0062087	320.686	98.7082
ENSDARG00000002847	fndc1	39.0122	-2.71673	0.00621048	73.9691	4.05538
ENSDARG00000079905	mark2a	1122.23	1.41019	0.00621916	585.019	1659.43
ENSDARG00000038847	gins3	220.182	1.66029	0.00624047	97.3797	342.985
ENSDARG00000061794	jam3b	148.62	-1.65391	0.00624047	231.198	66.0416
ENSDARG00000074346	l3mbtl1b	111.229	1.5928	0.00627715	51.3245	171.133
ENSDARG00000101556	si:ch1073-475a24.1	9.21306	2.75025	0.00627715	0	18.4261
ENSDARG00000003931	cndp2	3106.5	1.3044	0.00629271	1726.96	4486.04
ENSDARG00000078188	fam160a2	255.883	1.96328	0.00630299	88.3217	423.445
ENSDARG00000017220	otud7b	553.218	1.61044	0.00631694	252.627	853.81
ENSDARG00000079790	PLPP1	94.7319	1.89573	0.00634557	34.603	154.861
ENSDARG00000077664	zgc:110239	2978.34	1.27259	0.00635999	1687.32	4269.36
ENSDARG00000007241	mycb	10180.7	-1.2354	0.00637421	14470.1	5891.31
ENSDARG00000033029	pkd1b	8.37271	2.781	0.00637421	0	16.7454
ENSDARG00000045493	slc35e3	285.343	1.70582	0.00637955	121.41	449.276
ENSDARG00000112840	hist1h2a10	95.8923	2.11129	0.00643245	28.9242	162.86
ENSDARG00000052859	chp1	1682.53	1.50465	0.00645041	825.706	2539.36
ENSDARG00000070387	nudt7	125.443	1.63173	0.00645041	56.343	194.543
ENSDARG00000097820	BX005129.4	294.341	-1.87072	0.00645041	478.516	110.165
ENSDARG00000094428	si:dkey-31f5.8	1372.2	1.22896	0.00645938	796.938	1947.45
ENSDARG00000079639	-	551.763	1.96799	0.00651825	189.523	914.003
ENSDARG00000034063	unm_sa911	544.331	1.68841	0.0065294	234.836	853.826
ENSDARG00000037833	mitfb	12.8104	3.03188	0.00657351	0.779158	24.8416
ENSDARG00000103980	ets2	7825.11	-1.30087	0.00664648	11292	4358.24
ENSDARG00000078310	cecr2	159.997	-1.90517	0.00666819	261.824	58.17
ENSDARG00000038668	gbp1	749.211	1.83453	0.00672267	288.406	1210.02
ENSDARG00000103208	il17ra1b	218.324	1.65555	0.00672267	96.1654	340.482
ENSDARG00000045064	ablim1b	4761.87	-1.6288	0.00672498	7378.68	2145.05
ENSDARG00000007244	acp2	2613.57	1.22213	0.00672882	1523.64	3703.49
ENSDARG00000026577	cdk2	1351.39	1.23918	0.00672882	780.187	1922.59
ENSDARG00000016154	zfp36l1a	2725.25	1.53634	0.00673496	1308.29	4142.22
ENSDARG00000037550	cyp21a2	6.82851	-2.71207	0.00673496	13.657	0
ENSDARG00000042151	skia	642.919	-1.33403	0.00673496	934.761	351.078
ENSDARG00000056617	rpgra	15.5531	-2.62656	0.00673496	28.8645	2.2416
ENSDARG00000013841	abl2	340.186	-1.38623	0.00674153	500.418	179.955
ENSDARG00000018124	psmd3	3683.95	1.60211	0.00674153	1690.38	5677.52
ENSDARG00000030236	tmem30aa	3722.08	1.14967	0.00679911	2258.74	5185.41
ENSDARG00000037924	gna13b	234.712	2.00699	0.00679911	77.649	391.776
ENSDARG00000097585	CR548634.2	192.147	-1.97996	0.00679911	318.953	65.3403
ENSDARG00000117716	BX005389.5	45.7676	-1.91358	0.00679911	75.0816	16.4536
ENSDARG00000092916	mlnl	225.572	-2.31937	0.00683029	398.354	52.791
ENSDARG00000018524	midn	7340.37	-1.5675	0.00683575	11231.1	3449.65
ENSDARG00000010280	clasp1a	1268.71	-1.29108	0.00689462	1826.77	710.645
ENSDARG00000040568	pdzd3a	84.6783	2.08425	0.00694608	25.7844	143.572
ENSDARG00000040853	shoc2	302.625	1.85861	0.00694608	113.768	491.483
ENSDARG00000102583	il4r.1	1469.92	-1.61868	0.00694608	2273.47	666.379
ENSDARG00000002403	nusap1	316.609	1.84833	0.00695885	120.567	512.651
ENSDARG00000051853	galns	737.492	1.27592	0.00699269	416.644	1058.34
ENSDARG00000090185	si:dkeyp-73b11.8	949.879	-2.33865	0.00699269	1683.72	216.034
ENSDARG00000020301	os9	1315.83	1.2092	0.0070608	772.159	1859.5
ENSDARG00000099411	zgc:158343	25801.7	-1.61544	0.0070608	39882.5	11720.9
ENSDARG00000101087	si:dkeyp-80d11.1	72.7668	-1.78305	0.0070616	116.279	29.255
ENSDARG00000059933	plpp3	190.416	-1.69798	0.00706371	299.209	81.6224
ENSDARG00000115610	ccl25a	62.4099	-2.23249	0.00706766	108.521	16.2983
ENSDARG00000078551	zgc:171242	2798.42	-1.33447	0.00708374	4070.12	1526.72
ENSDARG00000025983	l3mbtl3	83.6825	1.72215	0.007109	35.07	132.295
ENSDARG00000061243	ubash3ba	576.206	2.2222	0.00711948	151.487	1000.93
ENSDARG00000018881	apobec2a	18.0975	2.68975	0.00715097	2.29342	33.9015
ENSDARG00000057262	si:dkey-91i10.3	100.582	1.76592	0.00716754	40.8119	160.352
ENSDARG00000055036	itih3a	6.64282	-2.69556	0.00720317	13.2856	0
ENSDARG00000100492	CT025669.1	346.422	-1.95476	0.00720317	572.874	119.971
ENSDARG00000022817	pvalb3	530.676	-1.80783	0.00722527	853.168	208.184
ENSDARG00000096446	AL929009.1	199.207	-1.43272	0.00722527	296.179	102.236
ENSDARG00000007976	si:ch211-220f16.2	1742.78	-1.23471	0.00726441	2477.48	1008.08
ENSDARG00000105077	hdhd5	30.1649	2.51932	0.00726557	5.10665	55.223
ENSDARG00000045444	fzd8a	1263.69	-1.16896	0.00728413	1768.82	758.559
ENSDARG00000070775	cyp2x9	28.7	-2.09644	0.00737627	48.7471	8.65281
ENSDARG00000069590	tmem150c	135.823	1.63089	0.00738729	61.1412	210.505
ENSDARG00000087863	cd44a	173.191	-1.55771	0.00742639	264.65	81.7326
ENSDARG00000032929	cryba1l1	103.749	-1.75894	0.0074625	165.181	42.3158
ENSDARG00000069150	rit1	207.478	1.48454	0.00746832	102.796	312.16
ENSDARG00000089009	frmpd1b	154.419	-1.70213	0.00747918	242.894	65.945
ENSDARG00000030804	fam120b	73.0949	1.85164	0.00749456	27.4666	118.723
ENSDARG00000002006	rxrbb	557.038	-1.65392	0.00752052	868.233	245.843
ENSDARG00000096715	si:dkeyp-104f11.9	168.286	-2.28849	0.00753348	295.878	40.6943
ENSDARG00000097048	CU571318.1	3135.29	-1.15082	0.0075668	4370.02	1900.56
ENSDARG00000001559	csmd2	32.0529	-2.12083	0.00756999	54.7009	9.40485
ENSDARG00000031848	pparg	21.572	2.53501	0.00757396	3.63192	39.5121
ENSDARG00000008976	mdn1	1207.97	-1.31668	0.00761527	1750.05	665.902
ENSDARG00000098821	sec14l1	317.268	1.90298	0.00762006	114.686	519.85
ENSDARG00000074126	ttc39a	71.6976	2.08018	0.00762562	21.7491	121.646
ENSDARG00000032799	kcnd2	12.6901	-2.93461	0.00769584	24.8333	0.546785
ENSDARG00000070673	ptgr2	276.856	1.39183	0.00776857	145.976	407.736
ENSDARG00000093936	si:dkeyp-1h4.6	108.945	2.44278	0.00776857	20.8493	197.04
ENSDARG00000111190	CR450686.5	30.8653	2.64922	0.00776857	3.77178	57.9587
ENSDARG00000002479	ercc6l	142.228	1.88301	0.00777496	52.4936	231.963
ENSDARG00000102191	CPNE8	2392.56	-1.4191	0.00777496	3547.39	1237.73
ENSDARG00000097774	CR387996.1	204.979	-2.09595	0.00779392	348.359	61.5986
ENSDARG00000104571	gadd45ab	7654.72	-1.33199	0.00779416	11130.7	4178.72
ENSDARG00000088975	si:ch211-14k19.8	20.3688	2.54788	0.00783835	3.26843	37.4692
ENSDARG00000117347	CR376741.4	366.609	-1.27793	0.00783835	526.586	206.632
ENSDARG00000103409	uhrf1	1211.32	1.44866	0.0078418	614.643	1807.99
ENSDARG00000096135	BX119963.1	50.4128	1.97983	0.00790532	17.1489	83.6766
ENSDARG00000068912	zgc:153012	41.8646	1.96997	0.00790536	14.1647	69.5645
ENSDARG00000032469	ampd3b	1593.94	1.16546	0.00792512	958.008	2229.87
ENSDARG00000076076	crtc1b	28.773	2.16444	0.00792512	8.16297	49.3831
ENSDARG00000088140	hsd17b7	816.498	1.6645	0.00797587	356.669	1276.33
ENSDARG00000110186	CDCP1	552.519	1.44749	0.00801968	280.198	824.84
ENSDARG00000070078	abcb11b	144.547	-1.88815	0.00805144	236.301	52.7924
ENSDARG00000071629	BX511034.1	35.6847	2.38376	0.00807903	7.65943	63.71
ENSDARG00000100308	SEMA4F	100.031	2.10936	0.00811167	29.3134	170.749
ENSDARG00000009868	dcaf11	762.452	1.25595	0.00815226	435.014	1089.89
ENSDARG00000060875	pde1a	12.4272	2.93187	0.00815273	0.879009	23.9754
ENSDARG00000004472	atat1	99.8589	1.59735	0.00816308	45.8017	153.916
ENSDARG00000102772	klhdc3	131.292	1.72736	0.00816308	54.7209	207.863
ENSDARG00000001470	mhc1zea	181.269	2.24219	0.00817679	46.0093	316.528
ENSDARG00000103317	capn5a	992.161	1.42785	0.00819047	509.767	1474.56
ENSDARG00000029955	glb1l	726.727	1.55094	0.00819118	344.474	1108.98
ENSDARG00000038881	acaa2	5424.15	1.28955	0.00820706	3035.64	7812.65
ENSDARG00000103967	CU062501.2	6.449	-2.65353	0.00821318	12.898	0
ENSDARG00000034300	sema3c	11.6578	2.86211	0.00822311	0.471472	22.8442
ENSDARG00000052103	dtymk	590.461	1.31285	0.0082317	326.113	854.809
ENSDARG00000098368	aplp1	5450.13	-1.5384	0.0082317	8295.63	2604.64
ENSDARG00000060917	anln	200.765	1.94475	0.008235	69.7988	331.731
ENSDARG00000027824	top1mt	140.283	1.69478	0.0082465	59.764	220.801
ENSDARG00000113678	BX511082.1	45.6411	1.90482	0.00825176	16.4581	74.8241
ENSDARG00000101507	ATG2A	71.1806	2.1141	0.00831933	20.7937	121.568
ENSDARG00000074301	cth	1256.47	1.77067	0.0083452	505.96	2006.98
ENSDARG00000004251	dhfr	912.295	1.59107	0.00835482	420.495	1404.09
ENSDARG00000021287	rab7b	729.609	1.39961	0.00835482	381.474	1077.74
ENSDARG00000103391	rab9b	18.8047	2.77612	0.00842061	1.41442	36.1949
ENSDARG00000095328	si:ch211-191i18.4	23.598	-2.6814	0.00842904	45.9843	1.21169
ENSDARG00000104181	tmsb1	61743.3	-1.49135	0.00842904	93043.8	30442.8
ENSDARG00000061736	ank3a	35.8375	2.35651	0.00843729	7.69577	63.9793
ENSDARG00000035751	ipo7	6903.18	-1.31299	0.00852754	9997.6	3808.76
ENSDARG00000036415	glb1	84.8488	1.89645	0.00852754	30.5355	139.162
ENSDARG00000074747	brwd1	1166.87	-1.30492	0.00852754	1686.72	647.026
ENSDARG00000105325	CABZ01044764.1	25.0055	-2.41281	0.00852754	45.0668	4.94428
ENSDARG00000015312	klf12a	128.892	-1.80896	0.00853302	207.608	50.1761
ENSDARG00000103529	snx1b	89.6468	2.0482	0.00853553	27.9581	151.335
ENSDARG00000117336	CU855948.1	48.3882	-1.73876	0.00853855	76.8241	19.9524
ENSDARG00000096665	si:ch211-202n12.2	16.0297	-2.72759	0.00855191	30.6101	1.44937
ENSDARG00000044827	wnt7aa	1486.65	-1.33545	0.00855741	2164.07	809.222
ENSDARG00000025914	si:dkey-190g11.3	431.192	-2.03516	0.00860867	725.46	136.924
ENSDARG00000030116	susd6	6314.96	-1.27235	0.00860867	9060.81	3569.11
ENSDARG00000061108	ep300b	2065.58	-1.32703	0.00863661	3001.2	1129.97
ENSDARG00000079525	slc39a5	161.155	1.75958	0.00863723	65.5515	256.759
ENSDARG00000063711	trim3a	1159.16	-1.52484	0.0086702	1759.87	558.446
ENSDARG00000059048	mpzl1l	244.049	2.21832	0.00867623	63.4422	424.655
ENSDARG00000068065	BX664721.2	18.6261	2.59708	0.00868424	2.64516	34.607
ENSDARG00000007624	gins1	547.198	1.77612	0.00868892	219.25	875.147
ENSDARG00000039576	fstl1b	1923.15	1.6311	0.00870459	859.61	2986.69
ENSDARG00000091539	ptprjb.1	31103.8	-1.32412	0.00870459	45165.3	17042.4
ENSDARG00000041540	sult1st2	36.783	2.33287	0.00872694	8.27095	65.295
ENSDARG00000027279	numb	2654.76	-1.27227	0.00873779	3809.26	1500.26
ENSDARG00000032601	macrod2	285.961	1.69654	0.00873779	121.622	450.3
ENSDARG00000096250	CT573429.2	18.7455	2.59844	0.00873779	2.70096	34.79
ENSDARG00000026149	slc46a1	58.152	1.87314	0.00874234	21.4287	94.8753
ENSDARG00000094139	BX511265.2	31.1322	-2.60665	0.00874961	58.3839	3.88052
ENSDARG00000056144	zgc:123244	14.8773	-2.64728	0.0087651	27.95	1.80457
ENSDARG00000056458	lhfpl5b	788.093	-1.33797	0.0087651	1148.02	428.161
ENSDARG00000075043	si:dkeyp-123h10.2	50.9985	2.19003	0.0087651	13.7686	88.2283
ENSDARG00000080987	CR847546.1	563.816	-1.99588	0.0087651	941.774	185.858
ENSDARG00000091640	si:ch73-352p4.5	110.83	1.66988	0.0087651	47.9763	173.684
ENSDARG00000117714	FQ311907.1	42.0527	-2.17712	0.00877645	72.709	11.3963
ENSDARG00000075614	apoc4	48.5754	-2.14668	0.00877772	83.3798	13.7709
ENSDARG00000077696	si:dkey-30h22.11	51.9661	1.92498	0.00878955	18.4436	85.4885
ENSDARG00000087262	zgc:63568	208.455	1.60003	0.00881925	95.5338	321.377
ENSDARG00000100379	si:dkey-34d22.2	61.7317	2.27515	0.00882028	14.9273	108.536
ENSDARG00000070437	rpl22	43814.4	-1.37623	0.00891912	64385.7	23243.1
ENSDARG00000030463	tppp3	15.1099	-2.56272	0.00897699	29.9465	0.273393
ENSDARG00000117545	CABZ01066320.1	16.4661	2.89924	0.00898176	0.715223	32.2171
ENSDARG00000003900	gpr61l	135.159	-1.58981	0.00909883	208.094	62.2233
ENSDARG00000100262	BX936382.1	97.9224	1.6425	0.00909979	43.2375	152.607
ENSDARG00000076104	sema4bb	298.059	-1.4546	0.00911323	445.952	150.167
ENSDARG00000009217	tom1l2	285.482	1.4912	0.0091696	140.436	430.529
ENSDARG00000057606	arl4ca	1709.37	1.69622	0.0091696	726.98	2691.76
ENSDARG00000058392	adcy2a	78.758	-2.38789	0.00918154	141.699	15.8175
ENSDARG00000102960	vps54	393.87	-1.38715	0.00918389	580.275	207.465
ENSDARG00000117758	CABZ01050280.1	68.2364	2.15	0.00921821	18.9639	117.509
ENSDARG00000103635	CT583728.7	2505.53	1.61481	0.00923565	1131.97	3879.09
ENSDARG00000043417	eipr1	855.595	1.2444	0.00925774	491.489	1219.7
ENSDARG00000114661	BX321875.4	32.0292	2.64111	0.00929234	3.3003	60.758
ENSDARG00000096773	pimr128	39.1021	-1.92142	0.00932388	64.3896	13.8146
ENSDARG00000054155	pcna	12585.2	1.25285	0.00933682	7189.49	17980.9
ENSDARG00000060123	ca16b	73.0441	-1.79675	0.00935737	117.287	28.8011
ENSDARG00000096509	si:dkey-27j5.9	16.129	2.69118	0.00935737	0.407537	31.8504
ENSDARG00000101675	zgc:123107	295.675	-1.45635	0.00936781	442.489	148.862
ENSDARG00000039208	nasp	1825.64	1.26417	0.00941955	1035.63	2615.65
ENSDARG00000111653	CABZ01081490.1	15.2807	2.89897	0.00945358	0.715223	29.8462
ENSDARG00000096662	abcc3	196.411	1.42335	0.00951005	100.855	291.967
ENSDARG00000028396	fkbp5	10492.2	1.74509	0.00952842	4292.6	16691.8
ENSDARG00000062971	sdhaf2	2527.42	-1.3745	0.00952842	3713.53	1341.31
ENSDARG00000078691	gigyf1b	4986.11	-1.40914	0.00954165	7383.47	2588.74
ENSDARG00000087843	cntn1a	40.1982	2.02315	0.00956985	12.9658	67.4305
ENSDARG00000097487	si:ch211-175f11.5	1244.25	-1.71265	0.00956985	1966.53	521.967
ENSDARG00000075864	igsf9a	112.524	-1.62307	0.00961351	174.489	50.5592
ENSDARG00000095451	si:ch211-196l7.4	13244.2	-1.55395	0.00961351	20245.4	6243
ENSDARG00000062933	cmip	4079.56	-1.22346	0.00973255	5789.06	2370.06
ENSDARG00000109287	HMBOX1	80.4356	2.27347	0.00976247	18.9483	141.923
ENSDARG00000062469	hipk3a	9073.79	-1.24377	0.00983168	12938.6	5208.97
ENSDARG00000078118	sinhcafl	523.216	-1.26219	0.00983738	749.26	297.171
ENSDARG00000104943	mad2l1bp	52.3621	2.25299	0.00983738	12.8137	91.9105
ENSDARG00000031095	veph1	23.9413	2.37415	0.00994918	4.83488	43.0476
ENSDARG00000070055	arfip1	1453.67	1.56128	0.0100037	680.903	2226.43
ENSDARG00000029832	slc26a1	343.923	1.83748	0.0100187	130.484	557.363
ENSDARG00000109974	tmem186	15.5392	-2.59916	0.010033	29.0647	2.01372
ENSDARG00000055099	fam184b	115.421	-1.95289	0.0101006	191.438	39.4031
ENSDARG00000025507	wdr24	470.287	1.27271	0.0101268	265.48	675.093
ENSDARG00000024546	pla2g4aa	121.746	2.41674	0.0101331	22.7598	220.733
ENSDARG00000009949	fndc4b	123.062	1.89708	0.0101744	43.8853	202.239
ENSDARG00000067596	fancb	14.5413	2.63343	0.0101979	1.80207	27.2806
ENSDARG00000036545	tmprss3b	10.8012	2.44907	0.0102089	0	21.6025
ENSDARG00000100143	lrp6	43.2649	2.21495	0.0102549	11.0042	75.5256
ENSDARG00000013528	mcm9	50.1541	2.08087	0.0102628	15.0353	85.2728
ENSDARG00000073704	si:dkeyp-72g9.4	318.298	1.74344	0.0102796	130.327	506.27
ENSDARG00000058560	adrm1	1930.02	1.14423	0.0103058	1172	2688.05
ENSDARG00000102068	shcbp1	270.56	1.91038	0.0103285	95.9773	445.142
ENSDARG00000105214	agtpbp1	28.2393	2.27679	0.0103285	6.60079	49.8777
ENSDARG00000103225	UBLCP1	28.0782	2.4479	0.0103967	4.91485	51.2416
ENSDARG00000057698	ctsd	12186.3	1.25575	0.0104786	6943.34	17429.2
ENSDARG00000045308	pola1	376.162	1.6026	0.0104877	171.166	581.158
ENSDARG00000101542	si:dkeyp-53d3.5	74.051	1.67198	0.0105138	31.7857	116.316
ENSDARG00000098415	CT956093.1	128.148	-1.68744	0.0105242	201.585	54.7114
ENSDARG00000018491	pdia4	5306.8	1.64958	0.0105555	2329.86	8283.74
ENSDARG00000039681	samm50l	1485.93	1.24146	0.0105555	853.691	2118.16
ENSDARG00000043561	psmc1b	2889.14	1.23271	0.0105555	1668.3	4109.97
ENSDARG00000076179	ngef	2083.04	-1.50378	0.0105667	3151.32	1014.76
ENSDARG00000110879	BX908804.2	31.2459	2.0467	0.0105913	9.72942	52.7624
ENSDARG00000075990	acap3a	404.381	1.62232	0.0106028	181.163	627.599
ENSDARG00000018178	pgm2	1302.96	1.35045	0.0106449	700.809	1905.1
ENSDARG00000102769	CDH18	52.3496	-2.08812	0.0107003	89.0874	15.6118
ENSDARG00000114948	zgc:194551	54.8379	-1.85116	0.0107003	89.2355	20.4403
ENSDARG00000026225	nsd2	251.836	1.6004	0.0107344	114.563	389.108
ENSDARG00000097646	BX511021.2	974.845	-1.5389	0.0108219	1486.53	463.158
ENSDARG00000102896	jmjd6	349.46	-1.35812	0.0109495	511.922	186.998
ENSDARG00000069543	galt	398.358	1.29668	0.0109731	221.197	575.518
ENSDARG00000083431	CABZ01039859.2	6.54105	-2.51673	0.0109934	13.0821	0
ENSDARG00000093591	si:ch211-282k23.2	34.9534	2.2997	0.0110202	7.85932	62.0474
ENSDARG00000102116	CABZ01072487.2	281.983	-2.23104	0.0110472	494.112	69.853
ENSDARG00000014674	acsl3b	943.067	-1.33959	0.0110694	1375.4	510.739
ENSDARG00000015540	psen2	598.809	1.22239	0.0110821	347.491	850.127
ENSDARG00000078195	fhit	1397.58	-1.31522	0.0110821	2027.2	767.969
ENSDARG00000055759	efhd2	16427.2	-1.40553	0.0110912	24321.9	8532.55
ENSDARG00000012215	umps	337.268	1.45832	0.0111022	168.943	505.592
ENSDARG00000095974	si:ch73-211l13.2	1031.91	-1.28611	0.0111403	1486.61	577.218
ENSDARG00000004470	prkcsh	8803.09	1.44705	0.0111652	4449.9	13156.3
ENSDARG00000044093	rpl13a	117661	-1.3213	0.0111652	170903	64418.3
ENSDARG00000117089	CKS2	646.188	1.15292	0.0112623	390.302	902.075
ENSDARG00000054448	kif1c	36.7803	2.21024	0.0113646	9.19829	64.3622
ENSDARG00000077176	zgc:174888	1164.53	-1.10803	0.0113646	1608.09	720.974
ENSDARG00000100965	ep400	449.829	1.49745	0.0113646	219.644	680.015
ENSDARG00000031015	dtna	7.47101	2.58779	0.0113697	0	14.942
ENSDARG00000052758	pimr130	34.4512	-2.11682	0.0113732	59.0433	9.85917
ENSDARG00000092020	CR855277.1	7.39366	2.59061	0.0114007	0	14.7873
ENSDARG00000024229	ubl7a	97.0063	1.47512	0.0114271	48.207	145.806
ENSDARG00000037980	elob	3204.77	-1.24942	0.0114271	4578.06	1831.47
ENSDARG00000055835	slc26a6	24.6684	2.4351	0.0114539	4.32749	45.0093
ENSDARG00000022187	usp6nl	6781.23	-1.16087	0.0114718	9484.93	4077.52
ENSDARG00000033771	hspbap1	133.121	1.53895	0.0114718	63.4336	202.808
ENSDARG00000008660	coro1b	3353.29	-1.14171	0.0115079	4668.65	2037.93
ENSDARG00000042641	cyp51	1975.25	1.88876	0.0115238	709.487	3241.01
ENSDARG00000054473	tinf2	249.693	1.56636	0.0115238	116.252	383.135
ENSDARG00000086746	prodha	1277.64	1.66435	0.0115238	553.631	2001.65
ENSDARG00000079705	si:ch211-152p11.4	293.355	1.28451	0.0115519	164.126	422.584
ENSDARG00000097737	si:dkey-188h10.3	290.998	-1.33523	0.0115519	424.03	157.966
ENSDARG00000101565	CU468917.1	126.695	-1.86212	0.0116221	206.877	46.5123
ENSDARG00000023157	cbln10	150.276	-1.87512	0.0116483	246	54.5533
ENSDARG00000071578	si:ch211-222k6.3	1704.96	-1.64452	0.0117338	2660.54	749.377
ENSDARG00000098204	CU984600.2	2763.63	1.23663	0.0118038	1590.78	3936.49
ENSDARG00000074225	si:ch211-269e2.1	186.149	1.65166	0.0118218	81.3403	290.958
ENSDARG00000100453	GALNT10	50.4902	2.30198	0.0118218	11.2358	89.7447
ENSDARG00000062672	kcnj19b	241.146	-1.38875	0.0118952	355.76	126.533
ENSDARG00000063731	rbm45	207.383	1.57874	0.0119008	95.2703	319.496
ENSDARG00000068175	ing5b	583.005	1.36841	0.0119008	309.969	856.042
ENSDARG00000102085	CT573793.2	130.942	-1.72062	0.0119008	207.601	54.2833
ENSDARG00000077559	LO017815.1	431.619	1.45915	0.0119446	216.431	646.806
ENSDARG00000097795	zgc:162952	1137.69	-1.32928	0.0119457	1655.89	619.482
ENSDARG00000019307	dusp5	25895.9	-1.62903	0.0120164	40283.7	11508.1
ENSDARG00000031930	erc1b	8.6988	-2.29986	0.0120164	17.3976	0
ENSDARG00000096941	si:dkey-77f5.8	51.2777	1.87189	0.0121033	18.5003	84.0551
ENSDARG00000012248	rgma	255.771	-1.4571	0.012124	383.399	128.142
ENSDARG00000037883	prcp	1203.16	1.21849	0.0121286	699.936	1706.38
ENSDARG00000092584	si:ch1073-385f13.3	127.529	1.79453	0.0121286	49.567	205.491
ENSDARG00000096554	si:dkey-25o16.4	72.5409	2.03621	0.0121286	22.5189	122.563
ENSDARG00000096762	si:dkey-61p9.11	13.294	2.66327	0.0121787	1.39453	25.1935
ENSDARG00000000018	nrf1	1633.75	-1.21787	0.0121816	2316.95	950.541
ENSDARG00000093931	rflnb	339.64	-1.47198	0.0121816	510.558	168.721
ENSDARG00000029890	si:dkeyp-86f7.4	294.573	-1.51293	0.0122255	446.913	142.233
ENSDARG00000017058	large2	1203.63	-1.12493	0.0122279	1669.21	738.056
ENSDARG00000013926	slc16a9a	5987.13	-1.44603	0.0122344	8950.06	3024.2
ENSDARG00000089519	fbln7	19.8486	2.55497	0.0123016	2.63703	37.0602
ENSDARG00000088219	zmp:0000000924	22.2524	2.5088	0.0123301	3.24065	41.2642
ENSDARG00000026736	il11ra	340.626	1.19345	0.0123574	200.905	480.348
ENSDARG00000040644	pxylp1	397.861	1.22466	0.012497	230.417	565.305
ENSDARG00000052164	znf507	296.192	-1.68511	0.0125467	466.342	126.042
ENSDARG00000117309	BX927081.3	161.913	-2.03092	0.0125467	273.421	50.4054
ENSDARG00000057249	zmynd11	3261.27	-1.30135	0.012619	4717.51	1805.03
ENSDARG00000062146	larp4b	702.482	1.38713	0.012619	368.545	1036.42
ENSDARG00000039354	ska1	112.373	1.76498	0.012636	44.7546	179.991
ENSDARG00000036944	ensaa	53.3638	1.71359	0.0126599	22.144	84.5837
ENSDARG00000009040	si:ch73-141c7.1	2217.98	-1.38426	0.012777	3270.5	1165.45
ENSDARG00000095061	CU394254.3	168.804	-1.83169	0.012777	274.116	63.4913
ENSDARG00000097617	si:ch211-178n15.1	1182.48	-1.4807	0.012814	1781.77	583.2
ENSDARG00000092274	si:dkey-3k20.1	31.3804	-2.31913	0.012848	56.1618	6.5989
ENSDARG00000060610	pcdh7b	3869.74	-1.1733	0.0129075	5430.61	2308.86
ENSDARG00000032221	phactr4b	77.6141	1.68854	0.0129209	33.1075	122.121
ENSDARG00000061735	hnrnpm	3304.8	-1.26067	0.0129527	4735.52	1874.08
ENSDARG00000020811	efemp2b	355.157	-1.64873	0.0130715	555.292	155.022
ENSDARG00000077085	zgc:110821	556.343	-1.33461	0.0131571	811.288	301.398
ENSDARG00000105258	cep72	60.1211	1.84524	0.0132418	22.3712	97.8711
ENSDARG00000056328	rhot2	244.681	1.80984	0.0132485	93.3978	395.965
ENSDARG00000068247	luzp2	11.0786	-2.69802	0.0132651	21.337	0.820178
ENSDARG00000101030	si:ch73-158p21.3	525.854	-1.32409	0.0132751	764.867	286.841
ENSDARG00000053966	cyp17a2	6.78845	2.56039	0.0133178	0	13.5769
ENSDARG00000020079	neil3	140.547	1.36079	0.0133765	74.8946	206.2
ENSDARG00000001781	tspan11	6253.43	1.32227	0.013503	3414.41	9092.45
ENSDARG00000036232	trpm7	499.92	-1.45061	0.013503	748.332	251.509
ENSDARG00000037892	psmc3ip	266.922	1.72482	0.013503	109.909	423.935
ENSDARG00000057173	ifit8	396.598	1.97257	0.013503	130.209	662.987
ENSDARG00000061222	uba7	146.566	1.6016	0.0135141	65.9737	227.159
ENSDARG00000078111	ap5z1	155.845	1.82512	0.0135158	58.6618	253.028
ENSDARG00000013174	nkd3	305.061	1.44156	0.0135366	154.578	455.544
ENSDARG00000017813	pigs	1496.66	1.4239	0.0135366	765.571	2227.76
ENSDARG00000018162	ctnnal1	219.458	1.28986	0.0135366	122.147	316.769
ENSDARG00000078066	elk1	84.9524	1.60817	0.0135366	38.1787	131.726
ENSDARG00000103395	si:ch73-281i18.7	53.0025	1.82495	0.0135366	20.13	85.875
ENSDARG00000044642	sc5d	1050.97	1.23662	0.013544	603.994	1497.95
ENSDARG00000055481	atf7b	1004.32	-1.58867	0.0136412	1550.22	458.426
ENSDARG00000045540	ppp6r2a	5191.15	-1.2357	0.0136637	7396.26	2986.04
ENSDARG00000101369	CABZ01090890.1	77.1789	1.82021	0.0136725	29.336	125.022
ENSDARG00000038802	cenpl	108.862	1.61619	0.0137033	48.3802	169.343
ENSDARG00000008433	unc45b	58.7015	1.73053	0.0137223	24.1333	93.2697
ENSDARG00000077605	frrs1b	228.356	2.02326	0.0137223	70.6743	386.037
ENSDARG00000052428	si:dkey-43k4.3	196.475	-1.54191	0.013868	300.139	92.8119
ENSDARG00000099715	si:dkey-152b24.7	1527.77	-1.5545	0.013868	2341.25	714.282
ENSDARG00000077403	col8a1a	27.9164	2.44459	0.013878	4.4714	51.3614
ENSDARG00000097790	si:dkey-234i14.6	270.111	1.49613	0.013878	131.767	408.455
ENSDARG00000031658	si:ch211-207d6.2	93.5347	-2.15179	0.0138977	162.178	24.8916
ENSDARG00000036870	arih1l	644.185	-1.30634	0.0138977	933.265	355.106
ENSDARG00000038639	elovl6l	67.411	-1.95286	0.0138977	112.275	22.5466
ENSDARG00000076169	pold3	800.488	1.24925	0.0139139	456.405	1144.57
ENSDARG00000100857	FP101914.1	1019.93	-1.23963	0.0139149	1454.49	585.367
ENSDARG00000022712	stat3	492.028	1.59216	0.0139396	223.594	760.462
ENSDARG00000005513	naca	109021	-1.36562	0.0140188	160139	57902.9
ENSDARG00000007614	wwox	165.87	2.01828	0.0140188	51.5658	280.175
ENSDARG00000070858	si:busm1-105l16.2	806.209	-1.41066	0.0140881	1196.44	415.978
ENSDARG00000094542	hwa	47.2555	-1.9776	0.0140881	79.1244	15.3865
ENSDARG00000045519	sfmbt2	61.5852	1.78856	0.0141407	23.7506	99.4198
ENSDARG00000051809	btr12	488.89	1.232	0.014269	281.708	696.072
ENSDARG00000101992	si:dkey-238k10.3	1295.72	-1.24456	0.014384	1850.44	741.002
ENSDARG00000088036	si:dkey-106g10.7	143.907	-1.82284	0.014426	233.563	54.2514
ENSDARG00000063252	prcc	1220.42	-1.70439	0.0144512	1932.01	508.821
ENSDARG00000114670	ube2c	652.483	1.94875	0.0145151	218.576	1086.39
ENSDARG00000002750	phf20a	436.944	-1.30873	0.0145361	633.296	240.593
ENSDARG00000103829	si:ch73-236c18.2	84.1075	1.7581	0.0145361	33.3804	134.835
ENSDARG00000002298	ankrd22	9420.78	-1.42453	0.0145457	14027.9	4813.68
ENSDARG00000098838	sdr42e1	413.126	1.39509	0.0146156	215.084	611.167
ENSDARG00000021859	erap1b	1837.32	1.13289	0.0146867	1120.42	2554.21
ENSDARG00000074363	TTC9	256.628	-1.63864	0.0146867	400.642	112.615
ENSDARG00000040046	snai2	102.936	-1.80424	0.0146957	166.57	39.3023
ENSDARG00000005425	wdfy1	531.267	1.44123	0.0147031	268.212	794.321
ENSDARG00000037495	rtn4rl2b	76.9693	-2.31012	0.0147031	137.888	16.0509
ENSDARG00000099301	cdc37	386.546	1.71934	0.0147031	158.911	614.18
ENSDARG00000087822	agap3	63.5835	1.9348	0.0147204	21.3892	105.778
ENSDARG00000027423	igf1ra	151.031	1.59957	0.0147582	67.9391	234.123
ENSDARG00000044900	prlhr2a	79.4366	1.97513	0.0147582	25.8839	132.989
ENSDARG00000076005	piezo2a.2	370.596	-1.59961	0.0147755	573.621	167.572
ENSDARG00000088238	kansl1b	2473.98	-1.28456	0.0147916	3566.96	1381.01
ENSDARG00000097567	linc.alien	2212.8	-1.48341	0.0147916	3339.4	1086.2
ENSDARG00000075964	plekhg4	4136.93	-1.18646	0.014852	5826.97	2446.89
ENSDARG00000098687	pygo1	96.7647	1.73125	0.0149287	39.3256	154.204
ENSDARG00000045598	akr1b1.2	12814.8	-1.24023	0.0149955	18284.8	7344.82
ENSDARG00000043586	fas	469.943	1.56067	0.0150314	218.115	721.771
ENSDARG00000029751	wbp1lb	344.382	1.39869	0.0151395	179.029	509.735
ENSDARG00000058367	abhd14a	214.091	1.3321	0.0151872	116.057	312.124
ENSDARG00000095453	si:rp71-17i16.6	10920	-1.3601	0.0151872	16026.2	5813.89
ENSDARG00000102252	USP34	192.219	1.84209	0.0151872	70.956	313.482
ENSDARG00000058231	nt5c2b	544.454	1.3668	0.015207	288.802	800.106
ENSDARG00000012390	kcnk5b	4042.69	-1.15529	0.0152124	5651.82	2433.57
ENSDARG00000067916	lyn	1886.78	-1.11638	0.015231	2612.55	1161.02
ENSDARG00000116587	znf980	24.7107	2.1281	0.0152582	6.69275	42.7287
ENSDARG00000002968	a1cf	788.549	1.35276	0.0152981	421.445	1155.65
ENSDARG00000036180	ccnb2	106.971	1.66796	0.0152981	45.5351	168.406
ENSDARG00000043962	fgf18b	68.4319	-1.74764	0.0152981	109.238	27.6257
ENSDARG00000012914	arhgef4	1125.72	-1.44949	0.0153039	1686.2	565.241
ENSDARG00000117260	CABZ01079870.1	14.9796	2.59657	0.0153039	1.53843	28.4208
ENSDARG00000031971	poglut2	773.332	1.38455	0.015304	404.882	1141.78
ENSDARG00000061272	BX294434.1	278.316	1.43423	0.0153586	141.379	415.253
ENSDARG00000053119	smpdl3a	59.513	1.69043	0.015364	25.0446	93.9815
ENSDARG00000100960	AL928901.1	371.091	-1.22576	0.0153693	527.874	214.307
ENSDARG00000060395	si:dkey-57k2.7	1163.65	-1.38964	0.0153768	1719.58	607.717
ENSDARG00000003523	itln3	253.915	1.86438	0.0154149	5.70214	502.129
ENSDARG00000045003	plvapb	81.2905	-1.81571	0.0154149	131.808	30.7731
ENSDARG00000076496	frmd4bb	124.751	1.80152	0.0154149	47.9116	201.591
ENSDARG00000036420	si:dkey-33c9.6	125.82	-1.70456	0.0154161	199.166	52.4747
ENSDARG00000093048	si:ch211-158d24.4	499.375	-1.35383	0.0154714	732.104	266.646
ENSDARG00000033742	nt5c1bb	210.874	1.62282	0.015516	93.1491	328.6
ENSDARG00000002231	plpp2a	599.941	1.86189	0.0155861	217.327	982.555
ENSDARG00000058578	ccdc106b	19.3997	2.40601	0.0156287	3.27656	35.5229
ENSDARG00000095894	BX511250.1	6.52486	2.50351	0.0156858	0	13.0497
ENSDARG00000010154	vstm4a	110.497	-1.63496	0.0157235	172.469	48.5251
ENSDARG00000099669	CR927050.2	853.092	-1.09592	0.0157235	1175.51	530.672
ENSDARG00000027063	arpc1b	6367.38	1.16326	0.0157641	3814.36	8920.4
ENSDARG00000055613	C16H1orf43	148.857	1.66586	0.0157641	63.8466	233.868
ENSDARG00000062573	znrf3	41.291	1.75843	0.0157641	16.478	66.1039
ENSDARG00000074367	usp12b	1257.13	-1.3475	0.0157641	1839.92	674.345
ENSDARG00000098955	ssh2b	79.8124	1.97763	0.0157641	25.533	134.092
ENSDARG00000018980	zgc:91890	672.519	-1.77684	0.0158121	1082.02	263.02
ENSDARG00000102343	si:dkey-243k1.3	95.6567	-1.69625	0.0158323	151.201	40.1123
ENSDARG00000094135	BX936305.1	34.2835	-1.97425	0.0158805	57.3693	11.1976
ENSDARG00000103907	sgo1	105.193	1.80865	0.0159234	40.1195	170.267
ENSDARG00000109263	BX640537.3	127.102	-1.60628	0.0159234	197.141	57.0633
ENSDARG00000074335	boc	2377.59	-1.30451	0.0159687	3445.43	1309.75
ENSDARG00000023498	gmppab	1344.68	1.29893	0.0159823	742.983	1946.38
ENSDARG00000035660	si:ch211-193k19.1	105.597	1.77554	0.0159823	41.1322	170.061
ENSDARG00000103400	si:ch211-161m3.1	39.6395	1.8699	0.0159823	14.1168	65.1623
ENSDARG00000056590	calca	74.6801	2.31316	0.0159898	15.0434	134.317
ENSDARG00000006863	si:ch1073-349o24.2	169.177	1.45153	0.0160061	84.5804	253.773
ENSDARG00000094127	AL954695.3	6.19506	-2.36764	0.0160262	12.3901	0
ENSDARG00000007407	barx1	192.609	-2.20073	0.0161161	338.429	46.7882
ENSDARG00000043210	nfic	123.571	1.76399	0.0161259	48.6439	198.498
ENSDARG00000077038	pbrm1l	1478.21	-1.05197	0.0161773	2014.72	941.707
ENSDARG00000009753	sf3b6	10001.2	-1.10992	0.0162217	13830.2	6172.24
ENSDARG00000076850	si:ch211-157b11.14	1744.85	-1.50181	0.0162217	2645.72	843.982
ENSDARG00000102855	neo1a	5032.53	-1.10478	0.0162217	6950.39	3114.66
ENSDARG00000087070	znf977	53.4589	1.70094	0.0162502	22.0683	84.8495
ENSDARG00000070957	im:7160594	76.1447	1.60266	0.0163107	34.1227	118.167
ENSDARG00000074589	rin2	2559.5	-1.14514	0.0164349	3570.13	1548.87
ENSDARG00000020133	jdp2b	77907.5	-1.31076	0.0164827	113080	42735.4
ENSDARG00000067796	clpxb	69.1807	1.74646	0.0164827	27.5305	110.831
ENSDARG00000088307	mrtfba	702.839	1.65749	0.0164827	302.367	1103.31
ENSDARG00000092799	camta2	36.6504	1.7865	0.0165036	14.1007	59.2001
ENSDARG00000005544	btbd3a	457.265	1.17235	0.0166292	272.249	642.281
ENSDARG00000033604	lrpap1	5441.74	1.1371	0.0166392	3307.04	7576.43
ENSDARG00000058202	pex16	450.699	1.54144	0.0166392	211.562	689.836
ENSDARG00000087666	fibpb	394.431	-1.22455	0.0166392	561.081	227.781
ENSDARG00000096736	CR749163.2	6.5311	-2.31713	0.0166392	13.0622	0
ENSDARG00000031782	crybg1a	640.963	-1.31933	0.0166962	932.35	349.576
ENSDARG00000053058	rps11	77202.3	-1.19573	0.0167172	109033	45371.8
ENSDARG00000059438	galnt18b	80.6265	-2.08131	0.0167377	138.421	22.8317
ENSDARG00000003189	psmd1	2626.88	1.52729	0.016739	1246.66	4007.1
ENSDARG00000038248	ggact.2	53.8922	1.5521	0.0168097	0.307686	107.477
ENSDARG00000104721	si:dkey-203a12.9	5736.37	2.38049	0.0168097	404.64	11068.1
ENSDARG00000039020	fbxo5	62.4115	2.01771	0.0169041	19.2704	105.553
ENSDARG00000015349	mfge8a	423.317	1.23831	0.016932	242.333	604.301
ENSDARG00000024746	hsp90aa1.2	6108.11	-1.89447	0.016932	10083.3	2132.9
ENSDARG00000025943	crygs3	17.9218	-2.47147	0.016932	33.4703	2.3734
ENSDARG00000078289	CABZ01046425.1	5.51193	-2.40239	0.016932	11.0239	0
ENSDARG00000005023	fkbp9	1515.15	1.45388	0.0170209	756.398	2273.9
ENSDARG00000079471	si:dkey-88j15.4	7.67156	-2.57769	0.0170899	15.0197	0.323376
ENSDARG00000037652	C1H7orf26	286.087	1.54781	0.0170995	133.402	438.772
ENSDARG00000036175	pcdh1b	5349.32	1.52424	0.0171449	2542.95	8155.68
ENSDARG00000101378	nadsyn1	586.419	1.70466	0.0171638	242.389	930.448
ENSDARG00000035871	rpl30	81071	-1.29165	0.0172276	117168	44973.9
ENSDARG00000042112	dio1	6044.39	-1.57928	0.0172276	9328.83	2759.95
ENSDARG00000092463	rhbdd2	185.521	1.64531	0.0172519	80.7433	290.299
ENSDARG00000101670	kntc1	170.361	1.8292	0.0172656	63.4692	277.252
ENSDARG00000055934	si:ch1073-416j23.1	88.7836	-2.02467	0.0172711	150.54	27.0275
ENSDARG00000043899	psma6l	4922.99	1.20574	0.0173047	2875.54	6970.43
ENSDARG00000059805	slc25a38a	49.9817	-2.35217	0.0173047	90.9137	9.04964
ENSDARG00000007708	nsa2	19217	-1.21827	0.0173193	27292.4	11141.6
ENSDARG00000011262	traip	101.098	1.43488	0.0173821	51.3394	150.856
ENSDARG00000070575	fam131bb	33.5163	-2.32893	0.0174271	60.6356	6.39694
ENSDARG00000099511	CABZ01034698.2	2427.23	-1.40817	0.0175267	3604.71	1249.76
ENSDARG00000100234	BX511246.1	164.112	-1.46384	0.0175381	246.772	81.4521
ENSDARG00000092134	rad54b	52.7583	2.01133	0.0175443	16.3058	89.2108
ENSDARG00000004460	desi2	836.262	1.37285	0.0175572	440.261	1232.26
ENSDARG00000097627	si:dkey-7i4.14	8.79723	2.61764	0.0175572	0.471472	17.123
ENSDARG00000092285	cenpv	27.9246	1.94737	0.0176007	9.14611	46.7031
ENSDARG00000036650	cdadc1	382.197	1.19415	0.0176019	224.696	539.698
ENSDARG00000076797	si:dkey-178o16.4	29.0882	-2.13917	0.017611	50.5618	7.61454
ENSDARG00000060564	slc25a21	166.471	1.388	0.0177141	86.6863	246.256
ENSDARG00000101644	ARHGEF17	1037.63	-1.53439	0.0177166	1585.87	489.394
ENSDARG00000021372	tob1b	19444	-0.999761	0.0177259	26160.1	12727.8
ENSDARG00000042861	ltk	13.6621	2.54347	0.0177315	1.55832	25.7659
ENSDARG00000059367	mfap2	272.089	1.38197	0.0177352	142.81	401.367
ENSDARG00000079148	nckap5l	196.04	1.44969	0.017742	97.9177	294.163
ENSDARG00000022615	si:ch211-241e1.3	1049.13	-1.61585	0.0177561	1632.62	465.634
ENSDARG00000079766	tap1	384.365	1.51222	0.0177561	183.987	584.742
ENSDARG00000091277	adra2da	14.0433	-2.49256	0.0177561	26.3321	1.75459
ENSDARG00000073994	si:ch211-276k2.1	66.9972	2.10767	0.0178416	18.3317	115.663
ENSDARG00000101982	spryd3	396.42	1.57555	0.0178573	180.968	611.871
ENSDARG00000095293	si:dkey-265e7.1	52.035	-2.04093	0.0178591	88.6968	15.3731
ENSDARG00000100588	rpl36	117671	-1.22001	0.0178591	167211	68131.2
ENSDARG00000071347	aftphb	68.3503	1.79631	0.017907	26.227	110.473
ENSDARG00000098201	mtmr3	480.344	1.2692	0.0179996	269.854	690.834
ENSDARG00000029500	rpl34	83518.2	-1.30234	0.0180097	121039	45997.3
ENSDARG00000006877	enpp4	38.3445	2.13662	0.0180121	10.0452	66.6438
ENSDARG00000069074	cry3a	6018.28	-1.41255	0.0180121	8948.9	3087.67
ENSDARG00000005643	gcat	1100.47	1.10827	0.0180489	679.16	1521.78
ENSDARG00000062552	lpar6a	242.95	-1.16057	0.0180489	340.229	145.67
ENSDARG00000012485	aurka	83.7832	1.95132	0.0180955	27.5615	140.005
ENSDARG00000005141	camkvb	6.05761	-2.31525	0.018141	12.1152	0
ENSDARG00000006514	her6	72755.4	-1.30733	0.0181423	105570	39940.7
ENSDARG00000020529	hacl1	499.983	1.24211	0.0181529	285.516	714.449
ENSDARG00000023298	rps27.1	93222.5	-1.2373	0.0181529	133033	53411.9
ENSDARG00000036548	s1pr2	653.073	1.43844	0.0181529	328.908	977.238
ENSDARG00000076991	dolk	96.6141	1.98522	0.0181529	30.344	162.884
ENSDARG00000078459	cux1a	1673.27	-1.14814	0.0181529	2336.49	1010.06
ENSDARG00000110581	mapk4	91.8511	1.52049	0.0182446	43.5051	140.197
ENSDARG00000116623	ftr50	73.6724	1.8869	0.0182446	25.5491	121.796
ENSDARG00000016404	ptch1	44.566	2.04734	0.018387	13.1655	75.9665
ENSDARG00000089271	nexmifa	91.069	-2.01208	0.018387	154.338	27.7996
ENSDARG00000021233	pgls	482.201	1.26994	0.0184612	270.603	693.8
ENSDARG00000104390	sumo2a	14.6631	2.6222	0.0184612	0.923059	28.4031
ENSDARG00000019501	pcnx3	203.995	1.71946	0.0184668	82.9908	324.998
ENSDARG00000074776	tmem154	384.601	1.34005	0.0184989	206.685	562.518
ENSDARG00000092872	upk3b	31.1702	2.42881	0.0185244	4.40746	57.9329
ENSDARG00000002634	b4galt1	304.097	1.32166	0.0185655	165.17	443.025
ENSDARG00000093354	si:ch211-57i17.2	226.639	1.69523	0.0185737	93.9869	359.291
ENSDARG00000014794	uqcrc2a	3821.8	1.04386	0.0185873	2443.18	5200.41
ENSDARG00000020777	cep85l	252.992	-1.18011	0.0185873	356.109	149.874
ENSDARG00000100549	CABZ01079427.1	169.833	1.46607	0.0185873	84.0959	255.57
ENSDARG00000105384	si:dkey-23a13.22	175.209	-1.7908	0.0185873	283.346	67.0716
ENSDARG00000069855	pnisr	1831.01	-1.34399	0.0186574	2680.28	981.728
ENSDARG00000006818	urod	399.005	1.53327	0.0187072	187.764	610.246
ENSDARG00000079839	arrdc1b	139.186	1.68642	0.0188911	57.9467	220.424
ENSDARG00000031757	tmc4	2743.02	1.28393	0.0189261	1526.99	3959.06
ENSDARG00000089026	si:dkey-183k8.2	16.1297	-2.37049	0.0189261	29.5029	2.75655
ENSDARG00000018426	aldh7a1	6859.57	1.14482	0.0189384	4146.2	9572.93
ENSDARG00000076118	cdip1	107.997	1.8361	0.0189811	39.5653	176.429
ENSDARG00000098191	si:dkey-16l2.20	14369.2	-1.337	0.0189811	21001.6	7736.73
ENSDARG00000091131	cry3b	343.072	-1.65169	0.0190996	538.513	147.63
ENSDARG00000113570	CR352226.7	180.644	-1.37309	0.0190996	266.304	94.9826
ENSDARG00000026799	suv39h1a	13.588	2.39607	0.0191192	2.27354	24.9024
ENSDARG00000102689	BX663516.2	23.9941	-2.05822	0.0191192	41.0355	6.95267
ENSDARG00000046107	caskin1	2165.91	-1.3221	0.019211	3154.51	1177.31
ENSDARG00000023840	pfkfb2a	157.448	1.4043	0.0192316	80.8611	234.035
ENSDARG00000087352	dnah2	101.911	1.70898	0.0192316	41.8734	161.949
ENSDARG00000017748	arhgap29b	2253.06	-1.14211	0.0192363	3142.21	1363.91
ENSDARG00000012632	zgc:92749	343.636	1.28664	0.0192666	191.222	496.05
ENSDARG00000019917	epb41l3b	195.354	1.38531	0.0192666	101.754	288.953
ENSDARG00000028448	edem2	1068.72	1.10019	0.0192666	662.148	1475.29
ENSDARG00000052435	spred2a	1395.54	-1.11538	0.0193447	1933.58	857.493
ENSDARG00000077400	rbm10	814.106	-1.66294	0.0193447	1281.37	346.846
ENSDARG00000106138	BX855618.1	815274	-1.61642	0.0193447	1.27009e+06	360458
ENSDARG00000101844	mibp2	49660.7	-1.13638	0.019472	69166.2	30155.2
ENSDARG00000004713	mad2l1	516.438	1.53315	0.0194765	243.341	789.534
ENSDARG00000058710	terf1	449.058	1.33234	0.0194889	242.719	655.398
ENSDARG00000100518	CR387919.1	28.3138	2.33471	0.0194889	5.08677	51.5408
ENSDARG00000091419	nrarpa	11253.3	-1.60253	0.0196021	17479.4	5027.28
ENSDARG00000004187	zgc:122979	22.8783	-2.22746	0.0196261	40.6395	5.11712
ENSDARG00000031494	prrc2a	6141.93	-1.1463	0.0196261	8575.52	3708.34
ENSDARG00000036501	rab39bb	59.6481	-1.51078	0.0196702	90.8008	28.4954
ENSDARG00000078657	FNDC10	787.455	1.35196	0.0196702	419.658	1155.25
ENSDARG00000039196	greb1l	4350.31	-1.33006	0.0196853	6349.41	2351.22
ENSDARG00000101523	arxb	11.3866	2.55	0.0196853	1.25063	21.5226
ENSDARG00000034093	dclk2a	80.2232	-2.11255	0.0196861	139.164	21.2821
ENSDARG00000017121	mafba	2617.25	-1.3449	0.0197725	3833.4	1401.09
ENSDARG00000063254	r3hdm4	397.148	1.30949	0.0197805	217.369	576.927
ENSDARG00000092290	si:dkeyp-26a9.2	34.0801	2.03051	0.0197887	10.1168	58.0434
ENSDARG00000052855	ctso	167.191	1.40036	0.019791	86.194	248.189
ENSDARG00000032155	ppm1aa	883.504	1.44851	0.0197914	441.227	1325.78
ENSDARG00000015543	s100a1	259.89	1.89424	0.0198184	89.3305	430.45
ENSDARG00000094345	si:dkey-261l7.2	112.454	1.80576	0.0199239	42.5245	182.383
ENSDARG00000109774	FH	774.022	1.23771	0.0199861	442.691	1105.35
ENSDARG00000015537	gad2	7.49669	-2.55728	0.020009	14.7518	0.241561
ENSDARG00000105562	si:dkey-23i12.7	5763.64	-1.46281	0.020009	8676.62	2850.66
ENSDARG00000098342	CABZ01065679.1	113.339	-1.66827	0.020025	178.607	48.071
ENSDARG00000055565	cacnb2b	78.401	1.75161	0.0200343	30.6955	126.107
ENSDARG00000094455	CR293531.1	12.9284	-2.51524	0.0201097	24.649	1.2078
ENSDARG00000053831	vtnb	7223.84	-1.27541	0.0201386	10408.6	4039.05
ENSDARG00000098918	mcoln2	427.295	1.25973	0.0203464	241.4	613.19
ENSDARG00000022832	bnip4	217.28	2.25274	0.0203619	12.6257	421.933
ENSDARG00000091916	ugt5b4	670.422	-1.66174	0.0203619	1055.45	285.394
ENSDARG00000020054	aox6	356.201	1.26862	0.0204028	200.235	512.167
ENSDARG00000056764	hydin	19.3803	2.18083	0.0204028	4.71876	34.0418
ENSDARG00000069677	nicn1	38.1464	1.78685	0.0204028	14.4525	61.8403
ENSDARG00000090914	si:ch211-117k10.3	349.901	-1.8649	0.0204028	575.689	124.112
ENSDARG00000096904	si:dkeyp-100a5.4	368.801	-1.57423	0.0204028	569.277	168.325
ENSDARG00000004305	vangl1	281.443	1.3369	0.0204088	151.145	411.742
ENSDARG00000055607	cgna	2457.96	-1.26166	0.0204112	3530.17	1385.76
ENSDARG00000062187	kif14	52.4693	2.07591	0.0204545	14.6757	90.2629
ENSDARG00000021794	hmmr	91.9163	2.1977	0.0204853	21.3083	162.524
ENSDARG00000098599	DMXL1	57.0619	1.84252	0.0205244	20.5301	93.5936
ENSDARG00000015502	adam10b	29.3966	2.33909	0.0206039	5.08677	53.7065
ENSDARG00000055719	ino80c	2264.62	-1.32229	0.0206039	3300.19	1229.05
ENSDARG00000104108	slco1d1	459.349	-1.34209	0.0206039	672.686	246.012
ENSDARG00000079145	CABZ01077217.1	847.41	-1.2866	0.0206346	1224.34	470.484
ENSDARG00000086584	CABZ01077217.2	141.177	-1.58672	0.0206346	218.687	63.6677
ENSDARG00000040571	ube4a	394.616	1.26895	0.0206385	221.154	568.078
ENSDARG00000077955	rnf6	1280.37	-1.30479	0.0206864	1858.09	702.64
ENSDARG00000036094	pias1a	451.828	-1.23394	0.020704	644.661	258.994
ENSDARG00000014053	olfm1b	89.6081	-2.25638	0.0207401	160.685	18.5309
ENSDARG00000090797	fam222a	16.3868	2.39098	0.0208544	2.58123	30.1924
ENSDARG00000055900	zswim5	1192.96	-1.18189	0.0208811	1680.68	705.253
ENSDARG00000057322	tmem47	812.148	-1.3866	0.0208903	1201.43	422.862
ENSDARG00000077516	recql4	79.0531	1.56305	0.0209179	36.2164	121.89
ENSDARG00000005619	nek2	62.184	1.83207	0.0210068	22.6113	101.757
ENSDARG00000099672	capgb	2248.26	1.15903	0.0210068	1346.92	3149.6
ENSDARG00000025033	stx5a	1325.29	-1.22299	0.0211131	1885.98	764.597
ENSDARG00000030114	vps4a	94.6238	1.73964	0.0211974	37.4443	151.803
ENSDARG00000068719	gmnc	7.14113	2.31811	0.0211974	0	14.2823
ENSDARG00000098595	hist1h2a11	14.4495	2.3513	0.0211974	2.60111	26.2979
ENSDARG00000026137	sfxn5b	105.302	-1.8796	0.0212745	173.878	36.7266
ENSDARG00000099500	clec3bb	265.809	-1.43047	0.0212745	397.316	134.301
ENSDARG00000114910	FO704772.2	953.547	1.96405	0.021324	303.132	1603.96
ENSDARG00000103433	rpl14	38258.6	-1.23465	0.0213909	54603.8	21913.3
ENSDARG00000000086	itsn1	811.731	1.27699	0.0213989	452.858	1170.6
ENSDARG00000070868	cfap126	333.894	-1.53515	0.0215254	511.381	156.407
ENSDARG00000008022	kif18a	37.5709	2.2505	0.0216701	7.87107	67.2708
ENSDARG00000117239	CR376741.2	585.803	-1.13379	0.0216776	815.704	355.902
ENSDARG00000039934	hlcs	27.9233	2.12257	0.0216864	7.3958	48.4509
ENSDARG00000039255	klhl21	386.154	-1.5084	0.0216975	587.681	184.628
ENSDARG00000092119	si:ch211-235f12.2	123.886	2.01534	0.0216975	4.4829	243.289
ENSDARG00000093188	si:dkey-75a21.2	641.25	-1.26214	0.0217149	921.335	361.164
ENSDARG00000101296	si:ch211-170p16.1	56.7218	-1.58051	0.0217149	87.6841	25.7595
ENSDARG00000029668	crim1	322.735	1.44977	0.0217863	160.718	484.751
ENSDARG00000100467	fkrp	76.4114	1.75391	0.0217992	29.8356	122.987
ENSDARG00000075842	pigt	252.993	1.60532	0.0218166	111.981	394.004
ENSDARG00000093458	si:dkey-76d14.2	16.6318	-2.45595	0.0218398	31.5727	1.69093
ENSDARG00000099527	nkiras1	674.398	1.06119	0.0219088	426.453	922.344
ENSDARG00000011564	sfpq	5968.29	-1.30119	0.0219192	8656.33	3280.25
ENSDARG00000016793	crybb1l2	5.3163	-2.2888	0.0219453	10.6326	0
ENSDARG00000077217	zgc:162184	436.567	1.4821	0.0219453	212.297	660.837
ENSDARG00000115805	GGT7	113.089	1.88096	0.0219598	39.3729	186.804
ENSDARG00000053130	pcp4a	7.85118	-2.04888	0.0219768	15.7024	0
ENSDARG00000102274	aaas	532.314	1.15881	0.0219771	318.79	745.839
ENSDARG00000104467	bglapl	6.75547	-2.54939	0.0219835	13.2694	0.241561
ENSDARG00000103785	sult2st2	98.8013	1.49735	0.0220829	47.7793	149.823
ENSDARG00000099222	prpsap1	454.842	1.09682	0.0220999	281.978	627.705
ENSDARG00000100791	tril	105.675	1.46048	0.0220999	52.3103	159.04
ENSDARG00000097244	zgc:174263	711.598	-1.21212	0.0221033	1010.24	412.952
ENSDARG00000041083	anpepa	184.851	-1.5171	0.0221074	281.896	87.8053
ENSDARG00000096849	si:dkey-16p21.8	1296.96	-1.97919	0.0221074	2190.87	403.054
ENSDARG00000093153	CU137717.1	123.982	-2.11799	0.0221411	215.858	32.1053
ENSDARG00000105018	lrrc20	308.186	1.27898	0.0221445	171.817	444.554
ENSDARG00000076464	lamtor1	103.743	1.39008	0.0221666	53.622	153.865
ENSDARG00000003607	nr2f6a	1951.6	-1.26364	0.0222507	2805.55	1097.64
ENSDARG00000102076	spink2.1	4924.33	-1.28639	0.0222712	7118.11	2730.55
ENSDARG00000060915	fbxl16	101.008	1.32524	0.0223114	54.6643	147.352
ENSDARG00000087238	si:ch211-161h7.4	387.645	1.31329	0.0223528	211.292	563.999
ENSDARG00000099315	nsdhl	1019.73	1.46464	0.0224628	502.053	1537.41
ENSDARG00000090326	MAPK8IP1	48.4847	1.8657	0.0224763	16.878	80.0914
ENSDARG00000095732	znf423	140.576	-1.39452	0.0224829	208.426	72.7266
ENSDARG00000102381	slc44a4	534.608	1.72863	0.0225713	213.667	855.549
ENSDARG00000004588	sox4a	2647.09	-1.03981	0.0226668	3600.47	1693.71
ENSDARG00000098908	CU062501.1	370.384	-1.49963	0.0227659	562.743	178.025
ENSDARG00000001817	zmp:0000000521	36.0893	1.98829	0.0227692	10.9005	61.2781
ENSDARG00000068149	tprg1l	169.739	1.5392	0.0228596	78.9479	260.529
ENSDARG00000079780	hnrnpul1l	901.87	1.1988	0.0228596	527.147	1276.59
ENSDARG00000026611	socs3b	3955.61	-1.23986	0.0230331	5654.72	2256.5
ENSDARG00000018846	dgat2	10.608	-2.48727	0.0231223	20.186	1.02991
ENSDARG00000024540	tspan36	2752.78	1.04149	0.0231268	1759.36	3746.2
ENSDARG00000111474	cfap100	75.7393	1.78051	0.023337	28.8089	122.67
ENSDARG00000076317	plod3	2826.97	1.02123	0.0233728	1826.5	3827.45
ENSDARG00000097766	mhc1lia	27.3232	2.18251	0.0234333	6.46075	48.1856
ENSDARG00000068246	plcb3	2807.66	-1.15183	0.0234338	3928.29	1687.04
ENSDARG00000071082	p4ha1b	1660.26	-1.05425	0.0234442	2266.64	1053.87
ENSDARG00000021110	poc1b	285.16	1.14106	0.0234712	172.344	397.975
ENSDARG00000040358	spred3	11.4826	-2.4995	0.0234712	22.2406	0.724683
ENSDARG00000045611	nfybb	2980.6	-1.31579	0.0234712	4340.18	1621.03
ENSDARG00000102995	rbm24a	864.088	-1.08749	0.0234712	1189.83	538.347
ENSDARG00000034522	rab6ba	15.2544	2.42265	0.0235131	2.0099	28.4989
ENSDARG00000053620	ebi3	385.7	-1.59804	0.0235131	599.802	171.599
ENSDARG00000061177	mov10b.1	1691.73	1.18421	0.0235778	997.312	2386.14
ENSDARG00000055566	mastl	347.589	1.63146	0.0236164	150.787	544.39
ENSDARG00000013236	dhcr24	184.936	1.56853	0.0237366	84.1849	285.686
ENSDARG00000062646	tet3	3993.43	-1.04761	0.0237366	5443.02	2543.84
ENSDARG00000095639	BX248515.2	47.2959	-2.14933	0.0237366	83.1355	11.4563
ENSDARG00000109327	znf1140	16.7298	2.36089	0.0237465	2.62528	30.8343
ENSDARG00000054128	im:7136021	3219.8	-1.12663	0.0237768	4477.25	1962.36
ENSDARG00000070568	atad5a	248.618	1.32777	0.0237768	133.999	363.237
ENSDARG00000091317	hunk	69.3918	1.51486	0.0237768	32.8759	105.908
ENSDARG00000037871	wipi2	377.308	1.23899	0.0238391	215.033	539.584
ENSDARG00000041723	TUBB4B	69.6185	2.0155	0.0238391	20.7009	118.536
ENSDARG00000103823	rbms1b	224.318	1.68078	0.0238391	93.2755	355.36
ENSDARG00000021579	orc5	648.224	1.21688	0.0238445	374.579	921.868
ENSDARG00000061651	marveld2b	291.899	-1.38745	0.0238445	432.248	151.55
ENSDARG00000100577	CU694481.1	1353.84	-1.27045	0.0238445	1950.02	757.654
ENSDARG00000101358	pard3aa	22.6022	2.03691	0.0238801	6.48491	38.7195
ENSDARG00000033993	slc19a1	132.128	1.31911	0.0239243	71.5066	192.749
ENSDARG00000086369	si:ch211-167j9.5	46.3219	-1.65294	0.0239257	72.9961	19.6478
ENSDARG00000102624	kif22	624.275	1.45762	0.0241097	308.097	940.453
ENSDARG00000044034	tmem86a	74.221	1.88317	0.0241141	25.6914	122.751
ENSDARG00000104177	cpne3	749.25	1.11759	0.0241141	458.757	1039.74
ENSDARG00000021688	mxa	3873.72	1.24092	0.0241449	2206.66	5540.77
ENSDARG00000024277	pigm	293.079	1.22614	0.0241449	168.294	417.864
ENSDARG00000087084	hcar1-4	526.747	-1.29977	0.0241449	764.357	289.136
ENSDARG00000102885	rsu1	200.989	1.23402	0.0241449	114.872	287.107
ENSDARG00000117107	CABZ01058647.1	39.5743	-1.86532	0.0241449	65.2756	13.8729
ENSDARG00000117340	CR457444.8	40.4102	-1.80263	0.0241449	65.6682	15.1522
ENSDARG00000060390	stk26	2211.8	-1.22129	0.0242042	3148.47	1275.12
ENSDARG00000112874	znf1067	34.9608	2.23816	0.0242042	7.09667	62.8249
ENSDARG00000117144	CT573337.1	20.4559	-2.25984	0.0242088	36.8397	4.07209
ENSDARG00000061738	march2	174.539	1.26882	0.0243413	97.5658	251.513
ENSDARG00000105643	adgrg1	1229.63	1.07816	0.0243413	769.951	1689.32
ENSDARG00000098852	smdt1b	719.361	-1.88473	0.0244536	1192.71	246.011
ENSDARG00000018259	atp1a3a	149.378	-1.88521	0.0244807	247.586	51.1711
ENSDARG00000083986	SNORA81	14.9543	-2.31914	0.0244824	27.3298	2.57865
ENSDARG00000063375	pter	707.986	1.35467	0.024615	375.478	1040.49
ENSDARG00000076710	si:dkey-42l23.7	6.0972	2.31734	0.024615	0	12.1944
ENSDARG00000076679	rai1	88.6185	-1.89698	0.0246283	147.272	29.9648
ENSDARG00000004034	arhgdig	6788.86	0.983918	0.0248406	4473.11	9104.6
ENSDARG00000013729	srsf6a	3103.68	-1.04361	0.0248406	4226.65	1980.71
ENSDARG00000063037	lipea	579.357	1.10014	0.0248786	358.097	800.618
ENSDARG00000094282	dnah11	6.2809	-2.12599	0.0249677	12.5618	0
ENSDARG00000025850	rps21	69635.3	-1.15156	0.0250124	97450	41820.6
ENSDARG00000039217	orc1	387.961	1.32504	0.0250124	209.624	566.298
ENSDARG00000116871	BX284638.2	190.927	1.95756	0.0250124	59.9918	321.862
ENSDARG00000037071	rps26	45421	-1.18769	0.0250392	64135.3	26706.7
ENSDARG00000102279	zmiz1b	91.0565	1.68061	0.0251752	37.6677	144.445
ENSDARG00000070617	vhl	978.172	-1.33876	0.0251781	1432.99	523.351
ENSDARG00000059507	F2R	3306.99	1.30127	0.0251835	1813.51	4800.48
ENSDARG00000116491	h2az2b	3134.06	1.45763	0.0251835	1547.03	4721.1
ENSDARG00000058791	zgc:171887	20.7035	2.05543	0.0252192	5.79771	35.6093
ENSDARG00000102356	scp2b	622.969	1.41797	0.0252192	315.796	930.142
ENSDARG00000077293	synpo2la	41.3209	-2.09342	0.0252202	71.8008	10.8411
ENSDARG00000017355	rsph9	11.313	-2.32046	0.025263	20.6577	1.9682
ENSDARG00000055133	cenpf	59.9506	1.98373	0.0254445	18.2441	101.657
ENSDARG00000061030	vezf1b	114.109	1.36233	0.0255107	60.1261	168.093
ENSDARG00000078731	si:dkey-85k7.12	1357.97	-1.40297	0.0255508	2019.73	696.217
ENSDARG00000095408	AL935184.2	371.017	-1.19275	0.0255571	524.716	217.319
ENSDARG00000078335	amot	553.847	1.58315	0.0255753	248.437	859.257
ENSDARG00000101205	mbd1a	552.325	-1.53442	0.0255753	847.061	257.589
ENSDARG00000100020	pim1	32912.4	-1.09476	0.0255888	45412.4	20412.4
ENSDARG00000041006	st3gal4	88.6478	1.59494	0.0256123	39.2262	138.069
ENSDARG00000055510	ypel3	3400.56	-1.18707	0.0256613	4801.45	1999.68
ENSDARG00000040290	pon3.2	5290.82	-1.3571	0.0256642	7784.93	2796.71
ENSDARG00000079382	hdx	84.639	1.52605	0.0256642	39.7322	129.546
ENSDARG00000079463	man2b2	581.424	1.30776	0.0256642	317.139	845.71
ENSDARG00000115041	ftr50	144.947	1.58012	0.0256642	65.1774	224.717
ENSDARG00000037358	polr3e	919.686	-1.17543	0.0257253	1294.68	544.694
ENSDARG00000078890	wdfy3	133.802	1.67456	0.0257253	55.5608	212.043
ENSDARG00000103001	si:ch73-215d9.1	31.4783	2.03346	0.0257253	8.94616	54.0105
ENSDARG00000068432	si:dkey-56m19.5	6673.64	1.00284	0.0258868	4352	8995.27
ENSDARG00000059075	nip7	1810.36	-1.32617	0.0259376	2644.3	976.434
ENSDARG00000055472	nubp1	1695.55	-1.26608	0.0259777	2441.09	950.005
ENSDARG00000099389	cdo1	266.749	1.41063	0.0260209	136.182	397.316
ENSDARG00000021193	coro1cb	26.8263	2.12672	0.0260621	6.51721	47.1353
ENSDARG00000016771	tfa	72.3393	2.00505	0.0261153	21.11	123.569
ENSDARG00000001354	slc6a22.2	496.578	-1.59809	0.0261269	772.998	220.158
ENSDARG00000090071	rxfp1	15.688	2.46301	0.0261355	1.23075	30.1452
ENSDARG00000100869	adcy9	102.14	1.58141	0.0261355	45.6275	158.652
ENSDARG00000092422	CR854838.1	713.808	-1.08033	0.0261894	981.246	446.369
ENSDARG00000061248	xylt1	56.4044	1.9302	0.026198	18.0171	94.7916
ENSDARG00000061692	yjefn3	9.04699	2.48859	0.026222	0.307686	17.7863
ENSDARG00000117628	BX005011.1	27.1448	-2.02385	0.0262592	46.413	7.8767
ENSDARG00000095281	zgc:152652	7.60556	-1.97267	0.0262625	15.2111	0
ENSDARG00000053917	alg10	155.051	1.55649	0.0263482	70.7607	239.341
ENSDARG00000112811	CZQB01141835.1	138.821	1.74039	0.0263482	54.4812	223.16
ENSDARG00000086678	ascc3	78.0985	1.85411	0.0263675	27.1993	128.998
ENSDARG00000079497	tcima	11082.8	-1.40068	0.0264285	16480.5	5685.07
ENSDARG00000095941	CT573247.1	131.573	-1.86578	0.026436	217.406	45.7413
ENSDARG00000060257	zranb1a	42.6626	2.25031	0.0264928	8.0997	77.2255
ENSDARG00000018820	flncb	11.7371	2.48288	0.0265864	1.08684	22.3873
ENSDARG00000086091	kcnn4	594.243	1.28731	0.0265931	328.397	860.089
ENSDARG00000006427	fabp2	373.14	-1.2835	0.0265963	539.639	206.64
ENSDARG00000110849	BX324177.9	16.7044	2.35518	0.0265963	2.45336	30.9555
ENSDARG00000093254	znf569l	58.2937	1.48863	0.0266238	28.1253	88.4622
ENSDARG00000006677	ripk1l	91.5023	2.0732	0.0266304	24.3423	158.662
ENSDARG00000074481	ulk1b	61.6016	1.64097	0.0266304	26.3671	96.8362
ENSDARG00000058178	zdhhc20b	97.0449	1.83638	0.0267154	34.4438	159.646
ENSDARG00000059610	gpr146	946.58	-1.48846	0.0267154	1437.1	456.064
ENSDARG00000019420	etnk1	15482.9	-1.03618	0.0268143	21051.2	9914.63
ENSDARG00000035256	eef2l2	91.8293	-1.62369	0.0268654	143.706	39.9528
ENSDARG00000076755	ap5s1	217.33	1.37863	0.0268703	113.372	321.288
ENSDARG00000102257	soul3	1090.1	1.14885	0.0269336	655.063	1525.14
ENSDARG00000026376	aco1	577.625	1.57377	0.0270824	260.456	894.794
ENSDARG00000099186	slc1a5	1838.21	-1.43767	0.027111	2757.91	918.511
ENSDARG00000030472	slc16a5a	190.555	1.53748	0.0271608	88.5041	292.607
ENSDARG00000021305	slc30a2	8.26429	-2.32475	0.0273038	16.2552	0.273393
ENSDARG00000069318	efr3bb	114.753	1.60929	0.0273038	50.1703	179.336
ENSDARG00000070168	sod3a	7.56903	2.45117	0.0273038	0.471472	14.6666
ENSDARG00000023903	atf2	42.5314	1.67767	0.027318	17.6927	67.3701
ENSDARG00000091058	sting1	51.0179	1.98952	0.0273857	15.0443	86.9915
ENSDARG00000102394	ap1g1	1549.7	1.28561	0.0274309	856.867	2242.54
ENSDARG00000003444	dhrs7	628.233	1.26526	0.0275541	351.926	904.54
ENSDARG00000079323	rgmb	491.486	-1.0549	0.0275556	671.42	311.553
ENSDARG00000095939	si:ch73-226l13.2	9.69585	-2.23117	0.0275556	19.1183	0.273393
ENSDARG00000074410	brip1	170.286	1.4167	0.0275674	86.5079	254.064
ENSDARG00000061205	stag1a	610.398	-1.44307	0.0276757	917.109	303.688
ENSDARG00000009754	zc3h11a	3897.43	-1.01865	0.0277291	5275.89	2518.97
ENSDARG00000068214	ccni	25401.5	-1.16893	0.0277291	35718.9	15084.2
ENSDARG00000079738	znf219	381.931	-1.37152	0.0277291	564.292	199.571
ENSDARG00000022176	IGLON5	414.57	-1.27561	0.0277426	598.436	230.703
ENSDARG00000040803	lactb	719.463	1.11193	0.0277426	441.777	997.148
ENSDARG00000092510	CR405715.1	40.4978	-1.83318	0.0277426	66.6058	14.3899
ENSDARG00000053459	rybpb	837.578	-1.17932	0.0277919	1180.97	494.189
ENSDARG00000008542	yod1	252.239	-1.47378	0.0278576	381.843	122.635
ENSDARG00000057456	ppp3ccb	494.073	1.18671	0.0278576	290.138	698.009
ENSDARG00000046072	snx16	111.198	1.77694	0.0279073	41.8197	180.576
ENSDARG00000063555	MAZ	138.117	1.49778	0.0279073	66.0675	210.167
ENSDARG00000027807	frk	733.51	1.25457	0.0279926	413.634	1053.39
ENSDARG00000115005	CABZ01075628.1	119.106	1.84674	0.0280371	41.5967	196.616
ENSDARG00000008697	epas1a	686.448	-1.86337	0.0281078	1135.98	236.92
ENSDARG00000103042	ddah1	33.7529	1.76011	0.0281182	13.0735	54.4323
ENSDARG00000095821	si:dkey-122a22.2	457.805	1.40649	0.028198	233.24	682.371
ENSDARG00000017165	slc3a1	7092.71	-1.07255	0.0282457	9735.2	4450.23
ENSDARG00000100597	ubxn4	69.151	1.39428	0.0282569	35.5134	102.788
ENSDARG00000030633	plekhm3	404.45	-1.42071	0.0283021	604.562	204.337
ENSDARG00000044056	ahi1	143.64	1.25633	0.0283021	81.0432	206.236
ENSDARG00000096300	CR847785.1	60.7899	1.71911	0.0283199	24.305	97.2748
ENSDARG00000093423	swsap1	111.822	1.79862	0.028342	41.51	182.133
ENSDARG00000035860	rps28	53512	-1.12158	0.028367	74369.2	32654.7
ENSDARG00000038956	fdx1b	46.3312	-1.88335	0.028367	76.9986	15.6638
ENSDARG00000058105	rpl36a	62443.5	-1.19257	0.028367	88335.1	36552
ENSDARG00000079347	zgc:194659	2826.23	-1.66741	0.028367	4474.46	1178
ENSDARG00000099949	FP236551.1	37.2072	2.06355	0.028367	9.8218	64.5926
ENSDARG00000101024	nufip1	360.537	-1.36363	0.0283907	531.575	189.499
ENSDARG00000060725	dnajc16l	177.792	1.67897	0.0284506	73.1767	282.407
ENSDARG00000018961	gtpbp4	11617	-1.04198	0.0284595	15822	7412.05
ENSDARG00000096287	BX510989.2	23.1751	-1.98057	0.0284871	39.374	6.97615
ENSDARG00000026325	mmp11a	20.7358	2.20815	0.0284916	4.39504	37.0766
ENSDARG00000026335	susd4	15.7344	-2.12293	0.0285034	27.5825	3.88643
ENSDARG00000011909	itpr2	378.498	1.4169	0.0285102	191.276	565.72
ENSDARG00000032197	klf12b	162.875	1.62736	0.0285102	70.1721	255.578
ENSDARG00000078658	supt20	148.297	1.70391	0.0285102	59.4933	237.101
ENSDARG00000099586	CR382383.2	30.697	1.94122	0.0285404	9.59769	51.7963
ENSDARG00000055190	slc17a5	610.284	1.37709	0.0285755	317.193	903.375
ENSDARG00000008155	sms	628.837	1.16545	0.0286243	373.724	883.95
ENSDARG00000103759	fahd2a	1476.42	1.08283	0.0286311	920.993	2031.86
ENSDARG00000096898	CR925728.1	16.2979	2.22503	0.028663	3.26843	29.3273
ENSDARG00000040854	tsg101a	1397.91	1.08628	0.0287092	869.933	1925.88
ENSDARG00000109443	EML4	272.54	1.68581	0.0287711	111.43	433.65
ENSDARG00000038862	kcnb2	156.732	-1.24992	0.0288071	224.952	88.5107
ENSDARG00000076466	maml1	1109.16	-1.37763	0.0288133	1641.44	576.888
ENSDARG00000075397	cipca	476.424	1.58736	0.0288571	212.459	740.39
ENSDARG00000000476	pms1	222.601	1.33546	0.0288786	119.208	325.995
ENSDARG00000012694	c3a.1	7435.23	-1.1308	0.0288815	10358.4	4512.06
ENSDARG00000037425	s100a10a	3661.54	-1.88302	0.0288815	6090.61	1232.47
ENSDARG00000099015	wacb	50.1572	1.89212	0.0289876	16.5227	83.7918
ENSDARG00000041435	uba52	50325.8	-1.18702	0.0290257	71104.5	29547
ENSDARG00000018923	fat2	12.0351	-2.367	0.0290728	23.1	0.970129
ENSDARG00000060600	capn15	74.2395	1.93995	0.0291499	23.1479	125.331
ENSDARG00000063577	klhl35	14.3518	2.38856	0.0291536	1.70222	27.0013
ENSDARG00000079616	cramp1	529.376	-1.29993	0.0291681	768.957	289.794
ENSDARG00000104301	zgc:193726	544796	-1.34367	0.0291681	799824	289767
ENSDARG00000030512	tsnaxip1	45.2597	-1.73001	0.0291726	72.6204	17.8989
ENSDARG00000069958	sh2b3	19.2974	2.14671	0.0291877	4.42734	34.1674
ENSDARG00000079234	si:ch211-285c6.2	8.10256	2.07437	0.0291921	0	16.2051
ENSDARG00000099555	foxo1a	2002.56	-1.26343	0.0292528	2883.39	1121.73
ENSDARG00000091768	dclre1a	155.038	1.21276	0.0292701	89.7538	220.322
ENSDARG00000102972	CABZ01075125.1	335.58	-1.41453	0.0292701	501.128	170.031
ENSDARG00000032256	txndc16	460.3	1.14657	0.0293059	277.014	643.587
ENSDARG00000102412	eci2	2443.02	1.2608	0.0293649	1370.28	3515.76
ENSDARG00000023868	si:dkey-172h23.2	898.191	-0.985833	0.0293656	1205.73	590.657
ENSDARG00000068919	rad51c	165.495	1.34076	0.029523	88.0401	242.949
ENSDARG00000095420	si:ch211-14a11.1	21.0136	-2.0888	0.029523	36.6959	5.33132
ENSDARG00000104660	si:ch73-132f6.5	648.052	1.01598	0.0295813	419.16	876.944
ENSDARG00000058369	mex3b	224.368	-1.32044	0.0296351	327.683	121.054
ENSDARG00000100232	glis2b	46.8907	1.85277	0.0296351	16.382	77.3994
ENSDARG00000077581	zzz3	765.571	-1.171	0.0296722	1077.46	453.678
ENSDARG00000076041	wwc1	576.133	1.59428	0.0297644	254.387	897.878
ENSDARG00000101595	tgm1l2	141.696	-1.77332	0.0297801	230.114	53.2793
ENSDARG00000032584	thnsl2	314.535	1.20558	0.0298775	182.727	446.343
ENSDARG00000012649	smad4b	133.304	1.46562	0.0298791	64.938	201.669
ENSDARG00000019371	flt1	10.91	2.44177	0.0298791	1.08684	20.7332
ENSDARG00000024717	selenbp1	2829.81	1.01821	0.0298791	1828.48	3831.14
ENSDARG00000055648	cpda	5427.23	-1.04083	0.0298791	7390.7	3463.76
ENSDARG00000103194	BX936433.2	281.438	-1.22024	0.0298791	401.097	161.78
ENSDARG00000036619	mgat3b	101.604	1.5802	0.0298916	45.2157	157.992
ENSDARG00000116334	tmem17	264.827	-1.26811	0.0299276	381.933	147.721
ENSDARG00000035963	ccdc96	256.002	-1.86944	0.0299939	424.881	87.1232
ENSDARG00000090882	si:rp71-36a1.5	5228.62	-1.19573	0.030056	7404.68	3052.56
ENSDARG00000101089	gart	64.2059	1.5804	0.0300637	28.5453	99.8664
ENSDARG00000060661	klf8	51.6011	1.71389	0.0300728	20.5538	82.6484
ENSDARG00000005972	ric8b	689.981	1.28589	0.0300907	380.462	999.501
ENSDARG00000036831	rnf41	1353.56	-1.16477	0.0300907	1902.31	804.808
ENSDARG00000101244	gli1	10.7756	-2.38395	0.0300907	21.0681	0.483122
ENSDARG00000097889	si:ch73-265h17.2	30.4367	1.94645	0.0302429	9.33406	51.5393
ENSDARG00000078401	larp4aa	147.486	1.97469	0.0302608	44.065	250.907
ENSDARG00000087941	pde8a	30.9643	2.11578	0.0302608	7.44413	54.4844
ENSDARG00000096961	si:dkeyp-47f9.4	30.9574	1.76156	0.0302608	11.7551	50.1596
ENSDARG00000105417	CU695207.1	147.87	1.16416	0.0302608	87.9957	207.745
ENSDARG00000105479	si:ch211-126c2.4	168.023	1.41641	0.0302608	84.9981	251.048
ENSDARG00000034181	esr2b	94.8825	-1.31354	0.0303502	138.392	51.3725
ENSDARG00000053364	pax10	31.9263	-1.93908	0.0303502	53.9278	9.92486
ENSDARG00000092970	tmsb2	5.13455	-2.13031	0.0303502	10.2691	0
ENSDARG00000111552	FO904980.1	138.996	-1.61931	0.0303502	217.682	60.311
ENSDARG00000086881	ier2b	83507	-1.09813	0.0303533	115407	51606.7
ENSDARG00000100420	tpcn2	309.638	1.21548	0.0303649	178.276	441
ENSDARG00000101175	mcu	596.239	1.64567	0.0303649	251.934	940.544
ENSDARG00000006220	ugt1a1	1416.57	-1.20338	0.0303706	2010.2	822.938
ENSDARG00000045150	csnk1e	196.034	-1.42012	0.0304591	293.387	98.6819
ENSDARG00000056050	kctd17	809.239	-1.21569	0.0304591	1151.96	466.514
ENSDARG00000032862	ugt5g1	2389.01	1.06737	0.0304687	1502.31	3275.71
ENSDARG00000060196	lhpp	119.773	1.67609	0.0304963	49.2155	190.331
ENSDARG00000074501	tnip2	101.255	1.39225	0.030638	52.0635	150.447
ENSDARG00000105118	GGH	90.649	2.02967	0.030638	24.8819	156.416
ENSDARG00000075826	msh4	27.5833	-2.1	0.0306948	48.2561	6.91046
ENSDARG00000030156	naglu	105.212	1.41855	0.030726	53.0943	157.329
ENSDARG00000041065	hspb1	214.52	1.70595	0.030726	86.1432	342.897
ENSDARG00000074676	rprd2b	117.61	1.37649	0.0307421	60.8944	174.325
ENSDARG00000075993	clic5a	95.6573	-1.5802	0.0307421	148.477	42.8377
ENSDARG00000086309	erlec1	1662.26	1.21151	0.0307555	960.392	2364.12
ENSDARG00000045708	adm2a	2627.33	1.41309	0.0307849	1330.75	3923.91
ENSDARG00000014488	ca2	1403.69	1.52486	0.03079	654.724	2152.65
ENSDARG00000039987	hivep2a	758.674	-1.40507	0.0307917	1130.86	386.49
ENSDARG00000042873	slc25a27	45.9196	1.6089	0.0308143	20.1377	71.7016
ENSDARG00000061240	cbln4	1055.72	-1.21179	0.0308285	1501.29	610.151
ENSDARG00000052182	rbfox2	4187.92	-1.13582	0.0308573	5843.65	2532.19
ENSDARG00000068763	plcg2	1581.25	1.16002	0.0308589	942.313	2220.2
ENSDARG00000014208	zgc:55413	18.5978	2.13468	0.0309434	4.37516	32.8204
ENSDARG00000100716	si:dkey-285b23.4	14.5496	2.23609	0.0309687	2.80895	26.2902
ENSDARG00000104643	tuba7l	167.57	-1.3291	0.030981	245.237	89.9039
ENSDARG00000061688	arvcfb	187.069	-1.31082	0.0310257	272.429	101.709
ENSDARG00000093111	si:ch211-209l18.2	271.569	-1.62209	0.0310257	426.191	116.948
ENSDARG00000042232	specc1lb	89.6689	1.63481	0.0310364	37.9159	141.422
ENSDARG00000075459	ptpn20	125.884	1.90217	0.0310464	40.8055	210.963
ENSDARG00000110528	sypa	100.757	-1.63692	0.0311327	158.522	42.9917
ENSDARG00000061110	zbtb44	27.7723	1.90635	0.0312643	8.91049	46.6342
ENSDARG00000096256	BX548060.1	30.3783	-1.80558	0.0312643	49.7128	11.0438
ENSDARG00000008377	epn2	2739.42	-1.00488	0.0312708	3696.77	1782.07
ENSDARG00000008849	ptprq	17.1383	2.28162	0.0312708	2.78093	31.4956
ENSDARG00000026902	cryzl1	880.131	1.01538	0.031361	569.426	1190.84
ENSDARG00000067546	si:ch211-193c2.2	88.4723	1.77786	0.0314049	32.8333	144.111
ENSDARG00000070076	actr2b	434.44	1.59988	0.0314049	190.339	678.54
ENSDARG00000105407	CU459186.6	229.55	-1.74626	0.0314049	370.546	88.5539
ENSDARG00000004169	stmn1a	1124.16	1.41481	0.0314773	568.496	1679.82
ENSDARG00000007678	ttyh3b	154.667	-1.26939	0.0314773	223.302	86.0319
ENSDARG00000094511	ccl20b	21341.9	-1.43259	0.0314773	32031.3	10652.5
ENSDARG00000100366	si:dkey-102m7.3	1542.17	-1.24702	0.0314773	2212.82	871.519
ENSDARG00000102671	dpyda.1	138.884	-1.21769	0.0314773	197.893	79.8753
ENSDARG00000103102	-	33.7648	1.6491	0.0314773	14.2205	53.3091
ENSDARG00000079915	pot1	149.691	1.33189	0.0315058	80.1117	219.269
ENSDARG00000002797	BX908804.1	51.6377	-1.61842	0.0315528	80.9803	22.2951
ENSDARG00000013351	cirbpb	68665.9	-1.14473	0.0315528	96042.7	41289.1
ENSDARG00000101239	hsd17b4	633.258	1.37045	0.0315528	330.338	936.178
ENSDARG00000105241	btr26	271.756	1.27464	0.0315528	150.793	392.719
ENSDARG00000012076	apoa1a	12.5955	-2.27265	0.0315531	23.0948	2.09612
ENSDARG00000014569	hnrnpr	1555.7	-1.13209	0.0315531	2169	942.39
ENSDARG00000020645	slc7a3a	1146.47	-1.19059	0.0315531	1622.08	670.864
ENSDARG00000039729	asap1b	484.152	-1.4074	0.0315531	722.284	246.019
ENSDARG00000042962	dgcr2	2835.4	-1.15127	0.0315531	3972.48	1698.33
ENSDARG00000061687	atxn1a	93.3785	1.64334	0.0315531	39.2818	147.475
ENSDARG00000096186	si:dkey-247i3.5	21.4155	1.89714	0.0315531	7.05624	35.7748
ENSDARG00000096331	si:ch73-248e21.7	6.53279	-1.95643	0.0315531	13.0656	0
ENSDARG00000019973	stk38a	388.205	1.23408	0.0315595	220.911	555.5
ENSDARG00000062269	fan1	421.255	1.02542	0.0315595	271.024	571.486
ENSDARG00000110040	CABZ01092781.1	22.7883	2.2703	0.0315595	3.69224	41.8844
ENSDARG00000054916	eif4ebp3	9420.03	-1.61376	0.0316336	14757.2	4082.83
ENSDARG00000025275	gbgt1l1	143.449	-1.67728	0.0316617	228.254	58.6436
ENSDARG00000079504	mfn2	2358.64	-1.02863	0.0318163	3202.67	1514.61
ENSDARG00000102828	mfsd11	160.59	1.27005	0.0318363	89.224	231.957
ENSDARG00000097368	si:dkey-244a7.1	1192.13	-1.14283	0.0318827	1666.86	717.41
ENSDARG00000070083	atp5f1b	57653.9	1.05011	0.0318852	36582.5	78725.3
ENSDARG00000100392	rps18	96650.3	-1.12166	0.0319184	134409	58891.9
ENSDARG00000016607	echdc2	2528.57	1.17448	0.031961	1493.89	3563.26
ENSDARG00000097519	AL935300.2	77.3579	1.4253	0.031993	38.973	115.743
ENSDARG00000013838	sulf2b	80.1504	-1.84629	0.0320555	132.534	27.7668
ENSDARG00000093872	CU137716.1	130.832	-1.43233	0.0320574	196.327	65.3366
ENSDARG00000089362	grn1	145.885	1.80278	0.0320724	52.7752	238.995
[truncated: 30,521 more rows]

## Sheet: up 
gene
mhc2b
si:ch211-181d7.3
rrm2
chaf1b
atp5mea
zgc:162509
irgq1
rasd3
phb2a
znf367
si:busm1-194e12.11
si:dkey-102c8.3
mybpc2b
ackr3a
irge4
zgc:92380
dscc1
pgap3
FO704772.1
haus4
si:dkey-247k7.2
chtf18
pbk
zwilch
tec
pole
slc6a19b
stk40
cdca7a
zgc:110540
mcm6
wdr91
zgc:77118
hells
tnfaip6
si:dkey-88n24.11
rh50
sult3st2
CU457819.1
mcm5
spata6l
si:ch211-59h6.1
BX677668.2
BX548015.2
gnsb
si:ch211-66i15.5
CABZ01005379.1
tmprss5
si:rp71-36a1.5
LO017771.1
si:dkey-7i4.24
prc1b
kif20a
rad51ap1
si:ch211-63o20.7
krcp
CABZ01009512.1
cdc45
dctd
prc1a
zgc:162509
dsn1
si:ch211-156b7.4
cep55l
capn7
tyms
tk1
mcm2
pola2
ndc80
gins4
zmp:0000001020
FP236630.1
hs1bp3
rad51
chek1
loxl2a
haus3
si:dkey-85k15.4
xylb
si:dkey-248g21.1
orc6
gsdmeb
rasef
rpa2
prss16
BX511034.7
galca
si:dkey-71b5.7
wdhd1
rbl1
si:dkey-66i24.9
aldh4a1
knl1
si:dkey-71p21.13
plk1
kif2c
dtl
dtwd2
hhat
pacc1
gsg1l2b
hist1h2a6
lman2la
irgf1
hipk2
ftr90
mki67
map3k2
myof
arsk
cenph
BX323555.2
si:ch211-87m7.2
arhgap17a
armc1l
klb
CABZ01115881.1
cenpi
esco2
ccne1
ankrd44
si:ch211-141e20.2
mxb
arsa
emsy
mcm7
CABZ01085139.1
haus5
CR855277.3
FQ312024.1
asf1ba
ncaph2
LSM10
FO704622.1
ncaph
si:ch211-181d7.1
postna
dagla
b3gnt2l
haus1
cip2a
CCDC134
pdia3
si:ch211-132b12.1
ntm
dck
FP236810.1
si:dkey-34e4.1
kpna2
mmp15b
slc4a4b
galk1
si:dkey-170l10.1
CABZ01068366.1
kif4
ptprt
efna5a
si:ch211-113a14.22
naga
aurkb
cdt1
FQ377903.1
vps37b
mis12
atp6v1c1b
prim1
aadac
tmlhe
HUS1B
pdp1
MYADM
exosc1
derl3
si:dkey-102c8.2
si:dkey-148h10.5
gab2
abi3bpa
ckap2l
kif23
ncapd3
CABZ01058261.1
zgc:171857
cenpo
hbbe1.1
CU104782.1
desi1b
zgc:172339
FO834799.1
fgg
ing5a
CABZ01073795.1
zgc:173729
paplna
ccna2
ttc38
zgc:113274
BX677668.1
hcfc2
wbp1la
ext1c
zdhhc3b
arhgef39
mcm4
notch1b
tmod4
FP325358.1
si:dkeyp-69e1.8
BX908796.3
tspan5a
nsl1
CABZ01069162.1
sv2
zgc:103482
itfg1
fanci
lrp1ba
FP102888.2
rgl2
si:ch211-246m6.5
si:dkey-225f5.4
bmpr1ba
igsf3
aarsd1
hipk1a
rc3h1a
CABZ01065328.2
AL929536.3
hexb
p3h1
BX510324.1
tpx2
catip
si:ch211-256e16.11
CU302321.1
CABZ01068273.1
ube2t
top2a
si:dkey-111e8.1
zgc:113278
espl1
zfyve19
angpt2b
nbn
melk
cdca7b
smc2
ldlrad3
zgc:171695
d2hgdh
zgc:173552
slc16a1a
neu1
mus81
mnd1
gpr19
prim2
si:dkey-246i14.3
mhc2bl
e2f8
FO834800.1
ctsba
haao
slco5a1a
si:ch211-113j14.1
ckmt1
cdk1
si:dkey-149m13.5
actr3
tm7sf2
si:dkey-6i22.5
rbfox1l
scpep1
ttk
pycard
si:dkey-42i9.7
acer2
sytl3
gtse1
evi5a
olfml2a
fen1
vps50
ncapg2
hist1h2a1
mal2
mcm10
MFSD3
F2R
rnf167
si:dkey-19a16.2
cdkn1a
si:ch211-266i6.3
mettl26
kif15
si:ch211-113a14.19
irf2bp2a
ern2
primpol
ssrp1b
ank3b
BX072576.1
mfsd1
ggctb
doc2b
stard5
zgc:91968
ncapd2
ripply3
tbcelb
serpinb1l4
b4galt4
ppargc1a
mybl2b
CABZ01072254.1
cep19
cadm2a
rnd1b
exo1
mcm3
si:ch211-113a14.19
tonsl
cdc20
mhc1zka
gla
eme1
pttg1
frem2a
gucy1b1
si:dkey-30c15.10
add1
C3H17orf75
BX465208.1
CABZ01072848.1
rrm1
cap1
si:dkey-267n13.1
stab1
yeats2
lrrc31
l2hgdh
CABZ01074745.1
hist1h2a11
cdc7
elovl5
etaa1
CR812464.1
nefma
pole2
ctbs
slc25a48
WDR70
ebpl
stk38l
mak
atad2
si:dkey-117m1.4
bcan
zgc:152658
spdl1
wdr47a
zgc:86764
NHLRC3
CR382337.2
folr
ptprga
magi1a
slc6a6b
nol4lb
orc4
cdca8
si:ch211-235o23.1
mapre2
NCEH1
spc24
si:dkey-40g16.6
grk5l
mxe
ago2
cnot4a
zgc:110626
adam17b
gpr137c
cul4a
kif20bb
ftcd
pdlim4
pkd1a
nfatc3b
cenpn
CU929149.1
swi5
cdr2l
ccnb1
mmd2a
plekha1b
FIG4
ptprt
cenpk
amn
rac3a
CABZ01018269.1
actc1a
ednrab
si:ch1073-513e17.1
si:ch73-366l1.5
e2f1
map1aa
cd40
rtkn2a
oxr1a
ext1b
si:ch211-113a14.19
mtfr2
si:ch211-125e6.5
ampd2a
tp53inp1
CR848723.1
tdp2b
ccne2
stm
cmpk2
tfpi2
si:ch73-184c24.1
si:ch73-168d20.1
cks1b
trip13
nlk2
acy1
nploc4
gnrh3
pgm3
si:dkey-185e18.7
apeh
dmrt1
slc4a4a
calr3a
dlgap5
adra2a
cercam
aspscr1
si:dkey-108k21.19
eno1b
capzb
renbp
slc38a9
gnai3
zswim7
ankib1b
tox4b
scap
gpcpd1
rerea
FP101861.1
dpp3
slc34a2b
parp9
zgc:162816
galk2
si:ch211-66i15.5
aldh3a2b
nuf2
efr3a
tnc
mbd5
lmf2a
CABZ01069184.1
nrg2b
slc29a2
psmd5
ect2
plod2
bnip3la
iqgap3
enc2
dnm2b
CT027989.1
rgs12a
chaf1a
diaph3
exoc5
si:dkey-117a8.1
tgfb3
gins2
csad
wdr20a
LO018340.1
serinc2l
abr
tuba1b
ppap2d
tp53inp2
chmp1a
zgc:101040
kctd9a
CABZ01113771.1
ncapg
nlrc3l
lamb1a
KYAT3
l3hypdh
als2a
zgc:194627
mcph1
snx2
hist1h2a4
dbf4b
esm1
shprh
psmd2
tnfrsfa
RTKN
fam171a1
pgbd4
ssr1
scel
pdia6
slc2a10
si:dkey-30k22.7
esama
si:ch73-263o4.4
numa1
zgc:173581
tmem175
zfyve1
wdr76
tyro3
si:dkey-121j17.6
slc25a22a
pald1a
rpn2
rnf141
si:ch211-266k8.4
zgc:172053
morn2
sh3gl1a
arhgap32b
plxnd1
sorbs2a
stt3a
si:ch211-113a14.12
GCNT4
si:dkey-175m17.7
lgmn
dhcr7
ggt1b
GNB4
mpi
ccnd2a
lrrc58a
rad51b
nectin1b
lta4h
asl
C25H12orf4
DISP3
aldh5a1
si:ch211-156j22.4
irgf4
nhsl1b
sptlc2a
pold1
shfl
pkp1a
gsnb
si:ch73-364h19.2
snrkb
cdca5
CU694532.1
rad54l
atp1a1a.4
rereb
si:ch211-122f10.4
kifc1
zmp:0000001048
mapk1
dnajc5aa
brd2b
si:dkey-16j16.4
ankrd13a
CABP4
st3gal3a
EPB41L2
slc39a7
si:ch211-285c6.6
six5
gorasp1b
nectin4b
rabl6b
cct2
rnaseh2a
rpa1
klhl4
wipf3
ccr8.1
dhrs7b
tfdp1b
ctsh
si:dkey-238i5.3
PSMD2
NINJ1
kctd9b
UBR1
slc26a3.1
ctss2.1
lats2
ints9
hmgcs1
pip4p2
hyal2a
fam117bb
aspm
zgc:103508
ralgapb
aff4
cyp2x7
slc38a3a
parvab
bub1
zgc:136493
cgref1
cst14b.1
meis3
tacc3
ar
zgc:152830
GPR161
sppl3
tecrb
pvrl2l
zgc:112285
BX663525.2
panx1a
atp6v1h
btr18
kif11
cfap43
med17
birc5a
trmt1l
mcf2la
ino80da
dspb
sqor
b3glcta
si:dkey-19a16.12
neurl1aa
ctps1b
dhx58
sema3b
pdk1
si:rp71-77l1.2
chdh
amdhd2
galnt10
si:ch1073-296i8.2
ska3
cyhr1
slc43a2a
hist1h2a11
si:ch211-244o22.2
ugp2a
tpp1
acvr1bb
SBSPON
zgc:154142
ube2r2
fam234a
dut
CABZ01038521.1
CABZ01066926.1
ARHGAP44
si:dkeyp-9d4.2
slc35a2
galnt12
hesx1
CU655845.1
tmem45a
dnmt1
EMC4
aldh2.2
ints4
dyrk1aa
fth1b
foxm1
CU984579.1
lig1
cdc6
rttn
adora2ab
fblim1
mfsd10
pygb
malb
tbc1d4
si:dkey-199m13.7
CR381544.1
SLC35E2B
si:dkey-58f10.10
sfxn1
zgc:171489
CU570691.1
bub1ba
spc25
tapbp.2
invs
rfc4
calua
mtmr9
acads
ptbp3
vezf1a
mark2a
gins3
l3mbtl1b
cndp2
fam160a2
otud7b
PLPP1
zgc:110239
slc35e3
hist1h2a10
chp1
nudt7
si:dkey-31f5.8
-
unm_sa911
mitfb
gbp1
il17ra1b
acp2
cdk2
zfp36l1a
psmd3
tmem30aa
gna13b
pdzd3a
shoc2
nusap1
galns
os9
l3mbtl3
ubash3ba
apobec2a
si:dkey-91i10.3
hdhd5
tmem150c
rit1
fam120b
pparg
sec14l1
ttc39a
ptgr2
si:dkeyp-1h4.6
CR450686.5
ercc6l
si:ch211-14k19.8
uhrf1
BX119963.1
zgc:153012
ampd3b
crtc1b
hsd17b7
CDCP1
BX511034.1
SEMA4F
dcaf11
pde1a
atat1
klhdc3
mhc1zea
capn5a
glb1l
acaa2
sema3c
dtymk
anln
top1mt
BX511082.1
ATG2A
cth
dhfr
rab7b
rab9b
ank3a
glb1
snx1b
slc39a5
mpzl1l
BX664721.2
gins1
fstl1b
sult1st2
macrod2
CT573429.2
slc46a1
si:dkeyp-123h10.2
si:ch73-352p4.5
si:dkey-30h22.11
zgc:63568
si:dkey-34d22.2
CABZ01066320.1
BX936382.1
tom1l2
arl4ca
CABZ01050280.1
CT583728.7
eipr1
BX321875.4
pcna
si:dkey-27j5.9
nasp
CABZ01081490.1
abcc3
fkbp5
cntn1a
HMBOX1
mad2l1bp
veph1
arfip1
slc26a1
wdr24
pla2g4aa
fndc4b
fancb
tmprss3b
lrp6
mcm9
si:dkeyp-72g9.4
adrm1
shcbp1
agtpbp1
UBLCP1
ctsd
pola1
si:dkeyp-53d3.5
pdia4
samm50l
psmc1b
BX908804.2
acap3a
pgm2
nsd2
galt
si:ch211-282k23.2
psen2
umps
prkcsh
CKS2
kif1c
ep400
ubl7a
slc26a6
hspbap1
cyp51
tinf2
prodha
si:ch211-152p11.4
CU984600.2
si:ch211-269e2.1
GALNT10
rbm45
ing5b
LO017815.1
si:dkey-77f5.8
prcp
si:ch1073-385f13.3
si:dkey-25o16.4
si:dkey-61p9.11
fbln7
zmp:0000000924
il11ra
pxylp1
larp4b
ska1
ensaa
phactr4b
cep72
rhot2
neil3
tspan11
psmc3ip
ifit8
uba7
ap5z1
nkd3
pigs
ctnnal1
elk1
si:ch73-281i18.7
sc5d
CABZ01090890.1
cenpl
unc45b
frrs1b
col8a1a
si:dkey-234i14.6
pold3
stat3
wwox
sfmbt2
btr12
ube2c
si:ch73-236c18.2
sdr42e1
erap1b
wdfy1
cdc37
agap3
igf1ra
prlhr2a
pygo1
fas
wbp1lb
abhd14a
USP34
nt5c2b
znf980
a1cf
ccnb2
CABZ01079870.1
poglut2
BX294434.1
smpdl3a
itln3
frmd4bb
nt5c1bb
plpp2a
ccdc106b
arpc1b
C16H1orf43
znrf3
ssh2b
sgo1
gmppab
si:ch211-193k19.1
si:ch211-161m3.1
calca
si:ch1073-349o24.2
nfic
znf977
im:7160594
clpxb
mrtfba
camta2
btbd3a
lrpap1
pex16
psmd1
ggact.2
si:dkey-203a12.9
fbxo5
mfge8a
fkbp9
C1H7orf26
pcdh1b
nadsyn1
rhbdd2
kntc1
psma6l
traip
rad54b
desi2
cenpv
cdadc1
slc25a21
ltk
mfap2
nckap5l
tap1
si:ch211-276k2.1
spryd3
aftphb
mtmr3
enpp4
gcat
aurka
hacl1
s1pr2
dolk
mapk4
ftr50
ptch1
pgls
sumo2a
pcnx3
tmem154
upk3b
b4galt1
si:ch211-57i17.2
uqcrc2a
CABZ01079427.1
urod
arrdc1b
tmc4
aldh7a1
cdip1
suv39h1a
pfkfb2a
dnah2
zgc:92749
epb41l3b
edem2
mad2l1
terf1
CR387919.1
FNDC10
arxb
r3hdm4
si:dkeyp-26a9.2
ctso
ppm1aa
s100a1
si:dkey-261l7.2
FH
cacnb2b
mcoln2
bnip4
aox6
hydin
nicn1
vangl1
kif14
hmmr
DMXL1
adam10b
ube4a
fam222a
recql4
nek2
capgb
vps4a
hist1h2a11
FO704772.2
itsn1
kif18a
hlcs
si:ch211-235f12.2
crim1
fkrp
pigt
nkiras1
zgc:162184
GGT7
aaas
sult2st2
prpsap1
tril
lrrc20
lamtor1
fbxl16
si:ch211-161h7.4
nsdhl
MAPK8IP1
slc44a4
zmp:0000000521
tprg1l
hnrnpul1l
tspan36
cfap100
plod3
mhc1lia
poc1b
rab6ba
mov10b.1
mastl
dhcr24
znf1140
atad5a
hunk
wipi2
TUBB4B
rbms1b
orc5
pard3aa
slc19a1
kif22
tmem86a
cpne3
mxa
pigm
rsu1
znf1067
march2
adgrg1
pter
arhgdig
lipea
orc1
BX284638.2
zmiz1b
F2R
h2az2b
zgc:171887
scp2b
cenpf
vezf1b
amot
st3gal4
hdx
man2b2
ftr50
wdfy3
si:ch73-215d9.1
si:dkey-56m19.5
cdo1
coro1cb
tfa
rxfp1
adcy9
xylt1
alg10
CZQB01141835.1
ascc3
zranb1a
flncb
kcnn4
BX324177.9
znf569l
ripk1l
ulk1b
zdhhc20b
ap5s1
soul3
aco1
slc16a5a
efr3bb
atf2
sting1
ap1g1
dhrs7
brip1
lactb
ppp3ccb
snx16
MAZ
frk
CABZ01075628.1
ddah1
si:dkey-122a22.2
ubxn4
ahi1
CR847785.1
swsap1
FP236551.1
dnajc16l
mmp11a
itpr2
klf12b
supt20
CR382383.2
slc17a5
sms
fahd2a
CR925728.1
tsg101a
EML4
cipca
pms1
wacb
capn15
klhl35
sh2b3
dclre1a
txndc16
eci2
rad51c
si:ch73-132f6.5
glis2b
wwc1
thnsl2
smad4b
flt1
selenbp1
mgat3b
gart
klf8
ric8b
si:ch73-265h17.2
larp4aa
pde8a
si:dkeyp-47f9.4
CU695207.1
si:ch211-126c2.4
tpcn2
mcu
ugt5g1
lhpp
tnip2
GGH
naglu
hspb1
rprd2b
erlec1
adm2a
ca2
slc25a27
plcg2
zgc:55413
si:dkey-285b23.4
specc1lb
ptpn20
zbtb44
ptprq
cryzl1
si:ch211-193c2.2
actr2b
stmn1a
-
pot1
hsd17b4
btr26
atxn1a
si:dkey-247i3.5
stk38a
fan1
CABZ01092781.1
mfsd11
atp5f1b
echdc2
AL935300.2
grn1
cog1
PCDH8
zdhhc12a
zgc:113176
bora
ap3b1a
EPHB3
casp6b.1
fbxw9
USP53
fancc
golim4a
slc39a3
bbx
kcnk1b
glyctk
cfhl3
tnfb
mms22l
ifit10
plbd1
BX663519.1
entpd6
prkar1ab
shank3a
cntn3b
pask
msh2
znf1010
lipeb
arih1
pold2
galcb
pigp
CT025742.1
ttll1
CABZ01068208.1
noctb
kalrna
tmco3
tet1
si:dkeyp-117b11.1
fbxo7
tbck
slco1c1
cdc42ep1a
pde5ab
C18H16orf70
pparaa
tmx4
zgc:153184
gpaa1
limd2
ptpra
nsun3
cacng5a
pccb
FP102786.1
hist1h2a3
nup54
myo6b
zgc:172090
sik3
BX296541.1
appbp2
map3k1
rb1
mfsd5
serhl
fam222ba
dnmt3bb.2
hs2st1b
cers2a
grnb
lss
si:dkey-237m9.2
abcc5
unga
atp5fa1
CABZ01085052.1
thap1
nudt12
si:dkey-201g16.1
anapc2
dnajb4
si:ch73-193i22.1
bckdhb
oxgr1b
zgc:171452
prdm5
abhd17ab
rab11fip1a
haus6
sts
inpp5d
got2b
slc35f6
si:ch73-265h17.1
CDIN1
cnksr3
tdrd7b
zbtb41
igf2r
ccnb3
plekhm2
pcyox1
mbd6
si:ch211-233m11.1
pgm1
dnajc3b
paqr3b
soga1
ggact.3
bace2
tgfbr3
slc44a5b
amigo3
sctr
socs6a
CR846082.1
tbc1d10ab
fam83d
coro2ba
si:ch211-113a14.19
chid1
ap3d1
pla2r1
ATE1
mccc1
cabz01076234.2
gig2p
kif20ba
scfd2
cthl
BX294100.1
rab3gap1
wwtr1
hyal1
aifm2
tdp2a
znf1000
arhgap18
myhz1.1
spata2
BX664625.2
kpna6
cpt2
fam149b1
rela
itsn2a
ddah2
CU469531.1
si:ch211-74m13.1
itga6a
xrcc5
acadsb
adcy2b
irs4a
-
si:ch211-256e16.3
ACSF3
si:dkey-150i13.2
pidd1
cdk5rap3
slco2a1
map3k5
GANAB
ccser1
nup214
gba3
ash2l
clstn2
il2rga
cdh26.1
paqr6
zmp:0000000662
si:ch211-198n5.11
dnm2a
acot9.2
pard6b
brat1
zgc:110224
CU856539.1
med23
si:ch73-29l19.1
zgc:92137
wdsub1
epc1a
C21H5orf24
cnpy3
CR388132.1
socs9
fam217b
ifngr1l
eml2
ptpn6
CABZ01109021.1
ippk
mpp1
cenpe
large1
znf1131
ftr05
cyp46a1.3
aqp3a
EIF2AK4
cdc25b
mylk5
CABZ01043953.1
nfxl1
nudt14
stn1
duox
arhgef10lb
tpst1
zdhhc8b
prmt8b
preb
rad52
RAP1GDS1
atxn1l
sox9a
si:ch211-201h21.5
abcf2b
ak9
fdft1
calr3b
zgc:153352
dnajc3a
tmem168a
mcoln1b
arl8bb
mbnl1
CR854897.1
sdc2
osbp
tspan4a
GRB14
dennd5a
si:dkey-16p6.1
ptpn9b
clta
si:dkey-222h21.1
dnajc16
BX470259.1
ppp1r1c
sirt5
stx7l
rtcb
RIN2
srp72
tgfbr2a
slc31a2
btbd10b
tapbp.1
rpz
ftr50
polm
FP102158.1
tmem248
CU459186.5
acad11
bbs1
zgc:66433
EARS2
fthl28
CABZ01101813.1
fbxo21
BX072561.2
mfsd6a
acoxl
CABZ01072952.1
si:ch211-9d9.1
nr1d4a
slc35c1
pkd2
bmt2
psmc1a
nptx1l
ift74
BX322665.2
hist1h2a5
RETSAT
fancd2
ift80
zgc:85936
ttll12
hist1h2a3
GOLPH3
si:ch211-222e20.4
e2f3
adpgk2
mtmr7a
cks2
stmn2b
vps35l
rca2.2
rnasekb
lhfpl2b
rufy3
sptbn1
JMJD8
zdhhc14
adpgk
SLC44A2
znf516
zgc:92630
rpn1
vkorc1
sil1
elmo3
kdm5a
CABZ01080371.2
si:ch1073-228h2.2
ndfip1l
cnnm4b
mst1ra
dip2ca
si:dkey-97o5.1
nqo1
nampta
CR847898.4
calm3b
sntb1
ptdss1a
mst1
sult3st1
si:ch211-191a16.2
hmgb3b
si:dkeyp-117h8.4
sp3a
tlnrd1
med25
txndc12
si:ch211-205a14.7
tmbim1a
faah
ulk3
fam102ba
znf1023
CR381700.1
psmc5
carm1l
si:ch211-213a13.2
snx7
zgc:194242
dcbld2
BX321875.2
CABZ01064472.1
mms19
tfe3b
ssuh2.4
numbl
acp7
dennd1a
sord
lrmda
BX784029.2
man2a1
hps3
b3gnt9
slc7a5
commd2
fh
eloa
ddost
FO904868.2
psme2
col6a3
si:ch211-197g15.6
trip4
man1b1b
PIGG
aifm4
sparc
CU929160.1
rmc1
abi2b
canx
adgre9
igf2bp1
hdac8
kyat1
psph
lgals9l3
kcnj13
plk4
unm_hu7910
decr1
si:dkey-182g1.6
dachd
UNC13B
fgfr1a
mdm1
ppm1h
abcc4
kynu
pgap2
sfxn3
tle2c
tbcd
npnta
chek2
iqck
zgc:56699
pgk1
arhgap20b
si:dkey-90m5.4
fzd5
ctsz
pfklb
CABZ01112732.1
ublcp1
ttl
btd
junbb
nckipsd
extl3
CU927890.1
tbc1d7
vps41
si:ch211-284e13.9
zgc:101765
pepd
tmod1
zgc:101785
si:dkey-49n23.1
triob
si:dkey-194e6.1
ano10a
zgc:163030
igf2bp2b
ankrd27
si:ch211-162i8.2
cln5
ago3a
sall4
cdk20
nin
si:ch211-160f23.5
csrnp1b
sh3gl1b
nipsnap2
lgi1a
CU207245.1
znf1034
lars2
si:ch211-113a14.19
CR855300.1
depdc1a
tmem187
reps2
ube2b
zgc:66313
mmp17a
pex11g
CABZ01074913.1
fam114a1
dpf1
coch
usp2b
pdzrn4
irak4
dip2a
slc37a4b
lipg
znf618
znf1021
phf13
aqp12
acat2
aftpha
frs2a
fynb
BX548028.1
lrp1ab
ralbp1
surf4
zgc:161973
tle5
sacm1lb
phip
pde3a
si:dkey-16p6.1
znf976
slc66a3
msantd1
si:dkey-57a22.11
CABZ01020840.1
zgc:153372
armt1
ftr01
gtf2h4
pane1
il4r.2
si:ch73-78o10.1
GUCY1A2
cnksr1
dera
psap
ddx1
BX908782.2
sdf2l1
CC2D1A
SMARCA4
prph2la
si:ch73-106k19.5
cep78
ches1
ncam1a
si:ch211-171l17.14
plxna3
foxj2
CABZ01055347.1
xrcc6
pggt1b
gxylt1b
hist1h2a10
TBC1D8
xrcc4
si:dkey-266m15.6
CU984600.3
vezt
kmt2d
tcta
knstrn
si:dkeyp-82h4.3
tmtc4
fbxw8
CABZ01110881.1
bves
ptprsa
hadhab
pgam1a
paqr7b
ppp2r5ca
plxnb2a
si:dkeyp-44b5.5
bin2b
si:dkey-58f10.6
stk38b
gpsm2l
ccr11.1
lrfn5a
si:dkey-264d12.1
pmt
jag1a
ap2m1b
smtnl
il11b
ints5
BX284666.1
dsela
amacr
psme1
GALNT3
irak1
lrrc8aa
zgc:173575
ulk1a
CU896630.2
elob
slc2a8
rassf8b
fam110a
plgrkt
si:dkey-7j22.1
insig2
mapk13
riok3
znf1104
ftr52p
asb1
rpa3
ifit16
si:dkey-91m11.5
gsk3bb
dmd
zranb3
me2
CABZ01040556.1
zer1
BX537263.3
eno1a
tgm2l
hint3
saa
zbtb14
ctsla
nup37
cpeb3
nup155
ankef1a
gna11a
si:ch211-162k9.5
psma8
C18H19orf54
si:dkey-57k17.1
si:ch211-133l5.8
exoc7
lrrk1
znf1121
ltbp1
elmo1
pik3c2g
ndufs1
zgc:110425
mtf1
CABZ01038524.1
nkain1
cyp7b1
acadvl
klf13
wdpcp
si:dkey-222h21.9
dbt
rhoua
rpz4
si:ch73-138e16.3
slbp
wtip
si:ch1073-44g3.1
ftr13
acadl
MDFI
mylpfb
pex2
fdps
bmper
si:cabz01069012.2
fkbp2
zmp:0000000912
LO017852.1
rtn4ip1
orc2
pigb
si:dkey-3h2.4
cep152
hibch
arl15b
FP085398.2
gls2a
selenou1a
cbr4

## Sheet: down
gene
COLEC10
CR812481.1
spon1b
si:ch211-253p2.2
ndufa4l2a
si:dkey-169i5.4
aqp1a.1
fbln5
CZQB01146713.1
egr3
ins
dpys
nocta
klhl33
si:ch211-160j14.2
myo3a
sinhcaf
cd74a
BX005367.1
nipal4
nlrc6
cacna1fb
sema3aa
FP074902.2
pimr162
nrxn2b
pygmb
im:7152348
cd74b
zgc:114046
asgrl1
zgc:174719
BX548073.3
sertad4
fosl2
si:ch211-238e22.4
cst3
spata22
fa2h
ptn
CU138553.1
pmaip1
tac4
si:dkeyp-9d4.3
lipca
zgc:194207
slc38a8b
rsrp1
CR391953.1
si:dkey-239h2.3
CU929070.5
si:ch73-7i4.1
znf536
pla2g1b
slc47a1
si:ch211-236p5.3
si:dkey-96n2.1
si:ch211-167j9.4
CR388042.1
slc7a3b
cntnap2a
si:ch211-213a13.2
gulp1a
zgc:154164
clstn3
myrf
sst1.1
rsl24d1
pglyrp6
g6pcb
si:ch211-209l18.4
arl5c
si:dkey-23i12.5
BX284696.1
tenm4
c9
fn1a
CU539058.1
her11
syt10
znf281a
cldnb
gpx4a
dao.3
mhc2a
scg5
FO904898.3
pfkmb
slc20a1b
CR788254.2
sinup
serpinf2a
si:ch211-170d8.8
cbln17
CR376741.3
cela1.5
CR589947.1
si:ch73-112l6.1
ddx3xa
CU207217.1
itgb1a
ponzr1
LO018315.7
ponzr3
scg2b
ngfb
taar20o
fosb
unm_hu7912
dysf
si:dkey-51e6.1
FP101887.1
adh8a
igfbp1b
DDX17
znf1156
bcl10
higd1a
map3k19
lmo4b
si:ch211-119e14.1
sc:d217
fosl1a
sik1
CU207311.1
si:dkey-102c8.2
cmtm7
grhprb
rsl1d1
zgc:92590
zgc:162183
CU207354.2
si:dkey-287g12.6
aldh1l1
fgf24
txlng
CU207311.2
eef2a.1
pnp5a
aqp9b
rims2a
ca7
egr2a
kng1
lrrc8db
nfil3-5
card9
phlda2
phf20b
CABZ01029938.1
BX908401.1
BX548073.1
slc12a10.3
ociad2
sh3gl3a
ero1a
cxcl18a.1
adgre10
zbtb16b
cfap53
dusp2
osbpl3b
ehbp1l1a
si:dkey-25g12.4
arglu1b
CR388095.1
si:ch211-227e10.3
tnrc6a
nr4a1
si:ch73-335l21.1
trim66
zgc:112234
SBNO2
AL845550.1
camk4
pvalb6
si:ch211-232m8.3
pimr136
arhgap27l
immp1l
lrrc4.1
cart1
CU929418.1
si:ch211-218h8.3
camk2b1
opn9
camta1b
FP017161.1
romo1
si:dkey-79d12.5
BX323564.1
si:ch211-106h4.5
patz1
rasa4
uspl1
nedd4a
pvalb9
CABZ01102109.1
tspan7b
si:ch211-214p16.1
si:dkey-60d5.3
BX530721.1
egr2b
ezh1
CR848032.2
rorcb
CR933791.2
si:ch211-127b11.1
si:ch73-256j6.4
CR812470.2
si:dkey-7j14.5
ngdn
kdm7ab
rplp2
proza
si:ch211-155o21.3
pimr191
syt7b
phyhd1
pik3r6a
flii
nfasca
pon3.2
celsr1b
icn
cdc26
jund
si:dkeyp-87d1.1
crhr2
CABZ01034698.1
si:dkey-22i16.9
si:dkey-263j23.1
slit2
apoa2
sdad1
CR450832.1
si:dkey-6f10.4
caprin1b
pnoca
gamt
si:ch211-106h4.4
s100w
crygs4
cfd
zgc:112966
esr1
si:ch73-265d7.2
dnajc24
cetp
odf3b
gem
BX957317.1
AL935166.1
igsf21a
epas1b
dnmt3ab
si:ch1073-184j22.1
BX511218.1
CR936321.5
si:ch211-217k17.7
BX927308.1
acsl4b
pcgf1
sp7
hnrnpa0b
cul4b
serpinb1l2
efna2a
alkbh1
mt-co2
CU570881.2
FP085399.5
kmt2e
nppb
ptgis
slc12a2
asap3
sult1st3
prr14
cd22
si:dkey-85a20.4
rnasel3
plxnb1a
rusc2
si:dkey-222p3.1
CR354430.3
FP236157.1
zgc:174862
nsg2
rpp30
AL954322.1
BX322647.1
plekha6
si:ch211-79k12.1
homer1b
CABZ01016692.1
coa3b
ttc14
atn1
si:dkey-25o1.7
fgfr4
CU326364.1
spartb
si:ch211-196h16.5
pyyb
glis2a
kctd14
serpinf1
c4
usp49
krt15
si:ch73-27e22.1
meis1a
prex1
si:dkey-62k3.5
wdr89
ptpn4a
cela1.1
sec61g
zgc:153018
MTERF4
gabrb1
foxo4
dlc
eif4a2
arnt2
smoc2
fam120a
pcdh1g11
ntd5
nsmfb
zbtb16a
h6pd
CT027646.4
si:ch73-375g18.1
BX005228.2
ca10b
si:rp71-77l1.1
CABZ01083943.1
tmem245
AL590149.1
si:dkey-95p16.2
CU929312.1
wipf2b
nop53
si:dkey-32n7.4
abcc1
btf3
ugt5b2
btg2
si:dkey-262j3.7
fndc1
jam3b
mycb
BX005129.4
ets2
cecr2
ablim1b
skia
rpgra
abl2
CR548634.2
BX005389.5
mlnl
midn
clasp1a
il4r.1
si:dkeyp-73b11.8
zgc:158343
si:dkeyp-80d11.1
plpp3
ccl25a
zgc:171242
CT025669.1
pvalb3
AL929009.1
si:ch211-220f16.2
fzd8a
cyp2x9
cd44a
cryba1l1
frmpd1b
rxrbb
si:dkeyp-104f11.9
CU571318.1
csmd2
mdn1
kcnd2
CPNE8
CR387996.1
gadd45ab
CR376741.4
abcb11b
aplp1
si:ch211-191i18.4
tmsb1
ipo7
brwd1
CABZ01044764.1
klf12a
CU855948.1
si:ch211-202n12.2
wnt7aa
si:dkey-190g11.3
susd6
ep300b
trim3a
ptprjb.1
numb
BX511265.2
zgc:123244
lhfpl5b
CR847546.1
FQ311907.1
apoc4
rpl22
tppp3
gpr61l
sema4bb
adcy2a
vps54
pimr128
ca16b
zgc:123107
sdhaf2
gigyf1b
si:ch211-175f11.5
igsf9a
si:ch211-196l7.4
cmip
hipk3a
sinhcafl
tmem186
fam184b
CT956093.1
ngef
CDH18
zgc:194551
BX511021.2
jmjd6
CABZ01072487.2
acsl3b
fhit
efhd2
si:ch73-211l13.2
rpl13a
zgc:174888
pimr130
elob
usp6nl
coro1b
si:dkey-188h10.3
CU468917.1
cbln10
si:ch211-222k6.3
kcnj19b
CT573793.2
zgc:162952
dusp5
rgma
nrf1
rflnb
si:dkeyp-86f7.4
large2
slc16a9a
znf507
BX927081.3
zmynd11
si:ch73-141c7.1
CU394254.3
si:ch211-178n15.1
si:dkey-3k20.1
pcdh7b
hnrnpm
efemp2b
zgc:110821
luzp2
si:ch73-158p21.3
trpm7
atf7b
ppp6r2a
si:dkey-43k4.3
si:dkey-152b24.7
si:ch211-207d6.2
arih1l
elovl6l
FP101914.1
naca
si:busm1-105l16.2
hwa
si:dkey-238k10.3
si:dkey-106g10.7
prcc
phf20a
ankrd22
TTC9
snai2
rtn4rl2b
piezo2a.2
kansl1b
linc.alien
plekhg4
akr1b1.2
si:rp71-17i16.6
kcnk5b
lyn
fgf18b
arhgef4
AL928901.1
si:dkey-57k2.7
plvapb
si:dkey-33c9.6
si:ch211-158d24.4
vstm4a
CR927050.2
usp12b
zgc:91890
si:dkey-243k1.3
BX936305.1
BX640537.3
boc
barx1
pbrm1l
sf3b6
si:ch211-157b11.14
neo1a
rin2
jdp2b
fibpb
crybg1a
rps11
galnt18b
hsp90aa1.2
crygs3
rpl30
dio1
si:ch1073-416j23.1
slc25a38a
nsa2
fam131bb
CABZ01034698.2
BX511246.1
si:dkey-178o16.4
ARHGEF17
tob1b
si:ch211-241e1.3
adra2da
si:dkey-265e7.1
rpl36
rpl34
cry3a
lpar6a
her6
rps27.1
cux1a
nexmifa
cep85l
si:dkey-23a13.22
pnisr
si:dkey-183k8.2
si:dkey-16l2.20
cry3b
CR352226.7
BX663516.2
caskin1
arhgap29b
spred2a
rbm10
BX855618.1
mibp2
nrarpa
zgc:122979
prrc2a
rab39bb
greb1l
dclk2a
mafba
si:dkey-23i12.7
CABZ01065679.1
CR293531.1
vtnb
ugt5b4
si:ch211-117k10.3
si:dkeyp-100a5.4
cgna
ino80c
slco1d1
CABZ01077217.1
CABZ01077217.2
rnf6
pias1a
olfm1b
zswim5
tmem47
stx5a
sfxn5b
clec3bb
rpl14
cfap126
CR376741.2
klhl21
si:dkey-75a21.2
si:ch211-170p16.1
si:dkey-76d14.2
sfpq
zgc:174263
anpepa
si:dkey-16p21.8
CU137717.1
nr2f6a
spink2.1
znf423
sox4a
CU062501.1
socs3b
dgat2
plcb3
p4ha1b
spred3
nfybb
rbm24a
ebi3
tet3
BX248515.2
im:7136021
marveld2b
CU694481.1
si:ch211-167j9.5
hcar1-4
CABZ01058647.1
CR457444.8
stk26
CT573337.1
smdt1b
atp1a3a
SNORA81
rai1
srsf6a
rps21
rps26
vhl
synpo2la
rsph9
si:dkey-85k7.12
AL935184.2
mbd1a
pim1
ypel3
pon3.2
polr3e
nip7
nubp1
slc6a22.2
CR854838.1
BX005011.1
tcima
CT573247.1
fabp2
gpr146
etnk1
eef2l2
slc1a5
rgmb
stag1a
zc3h11a
ccni
znf219
IGLON5
CR405715.1
rybpb
yod1
epas1a
slc3a1
plekhm3
rps28
fdx1b
rpl36a
zgc:194659
nufip1
gtpbp4
BX510989.2
susd4
kcnb2
maml1
c3a.1
s100a10a
uba52
fat2
cramp1
zgc:193726
tsnaxip1
foxo1a
CABZ01075125.1
si:dkey-172h23.2
si:ch211-14a11.1
mex3b
zzz3
tgm1l2
cpda
BX936433.2
tmem17
ccdc96
si:rp71-36a1.5
rnf41
gli1
esr2b
pax10
FO904980.1
ier2b
ugt1a1
csnk1e
kctd17
msh4
clic5a
hivep2a
cbln4
rbfox2
tuba7l
arvcfb
si:ch211-209l18.2
sypa
BX548060.1
epn2
CU459186.6
ttyh3b
ccl20b
si:dkey-102m7.3
dpyda.1
BX908804.1
cirbpb
apoa1a
hnrnpr
slc7a3a
asap1b
dgcr2
eif4ebp3
gbgt1l1
mfn2
si:dkey-244a7.1
rps18
sulf2b
CU137716.1
bco1l
kat8
pde4a
mnta
tln1
sytl2b
si:dkey-11o1.6
sdc4
si:ch211-28p3.4
pinx1
mustn1b
bsg
swt1
igdcc3
nfkbib
plcd1b
appb
btbd2a
si:dkey-184p18.2
sycp1
znf281b
cadps2
CU570769.3
dtx2
nova2
BX324003.1
CU570781.3
C18H15orf61
slc41a2b
si:ch211-165d12.4
si:ch211-281l24.3
CABZ01083442.1
elavl1a
BX569787.1
sltm
srprb
sh3bp5la
aplp2
sat1a.2
mfap3l
ube2al
tmem98
c1d
lyrm7
sema4ab
sat1a.1
SLC4A5
znhit3
CU855801.1
zgc:136864
c6ast3
rpl31
AL929282.1
lmo7a
hnrnpa0a
CABZ01015815.3
git1
si:ch211-163b2.4
cd3eap
CU467646.7
baz2a
si:ch211-210b2.4
CABZ01028771.1
AL929108.1
CR388143.1
znf384l
rps16
FP016142.1
wasla
rheb
si:dkey-46g23.1
nkpd1
IYD
rpf1
thraa
pcloa
CU467861.6
BX936461.1
tada2b
hnrnpua
si:ch211-240l19.6
ptgs1
FAM72B
ptprua
gmps
rpl10
si:ch211-250k18.7
CR381689.1
tac1
zeb2b
agr2
tpt1
nrde2
rock2a
brd1b
gpr22a
spns2
comp
mdm4
BX890559.1
zfr
fbxo11a
CR759845.1
CU855930.2
CR847530.1
BX248521.2
grm6b
si:dkey-262k9.4
slc25a25a
junba
CU929451.1
mt-co3
si:ch211-207i1.2
kdm2bb
si:dkey-58f10.4
plekhm1
acsl4a
CR927050.1
upf1
ugt5b1
arid1ab
sort1a
zgc:101562
sema5a
znf654
CR790382.4
map7d3
eif3f
zgc:162730
foxk2
znf593
c4b
aqp11
rpl12
dyrk4
itga10
cica
rpl38
mtmr1a
nanos1
jag2b
cept1b
si:ch211-198m17.1
CR385035.1
tnrc6b
dicer1
si:dkey-81l17.6
prkar1aa
rpl5b
BX511129.3
CR848841.1
rpph1
prr18
clk4a
fbp1b
zgc:172079
si:ch1073-412h12.3
sp4
ppm1ab
hnrnpa3
ccdc102a
adcyap1r1a
zbtb1
nxt2
plag1
si:ch211-121a2.2
perp
slco2b1
xpo7
thrb
rps24
rexo4
wdr47b
tmem35
lrch1
slc25a5
CR354549.8
si:ch211-250k18.6
trim35-28
zgc:110249
CU463038.2
polr1d
tmbim1b
pax6b
iscub
lrch3
cmc2
rps29
rwdd
scn4ab
wu:fu71h07
CABZ01066312.1
igsf9ba
si:ch211-12p12.2
utp23
pbdc1
chd1
rps15a
BX276103.2
si:ch211-209j12.2
irf2bp1
eif1ad
si:ch211-213a13.1
CR388369.1
ndst1a
si:dkey-200l5.4
dnmbp
kif21a
dusp7
zgc:171772
zgc:153409
cyp2ad2
ice1
smg7
sorcs2
BX465836.1
qkia
BX537104.1
BX469925.1
rpl21
lhx4
serbp1a
sash1a
krt5
mllt10
rpl35
plp1b
bicra
si:dkey-111e8.5
rbm15b
ripk4
mt-nd3
elovl7a
rab6bb
mrpl32
elp6
nr4a2b
grapb
DAB2
pcnp
si:dkey-242e21.3
si:ch211-203d1.3
si:dkey-254e13.6
rc3h1b
CR548622.3
dyrk2
sf3b1
sh3rf1
leng8
rskra
arhgap20
CABZ01086293.1
BX547992.1
akt3a
lrig1
sim1a
fam207a
per1a
zgc:171500
rps19
cnrip1a
hemgn
si:ch211-126j24.1
ptprea
si:ch211-191a24.4
taok1b
clp1
si:dkeyp-72e1.6
arf4b
erh
polg2
elf1
sorl1
rpl39
sox13
ppp1r15b
ch25h
suco
utp3
il13ra1
ccdc103
CR847545.1
rbm19
edc4
CR318588.4
ATP11B
pcsk1nl
s100a10b
acin1b
zgc:172120
si:dkey-205h13.1
CT573256.2
pnpla3
tbxas1
zzef1
rbm33a
si:dkey-164f24.2
ifitm5
cbx7a
abhd15a
mast3b
map2k2b
hist1h4l
eif1
plxnb1b
slc29a1b
NC_002333.9
thy1
il6st
tasp1
kif1b
zgc:174696
neu3.3
si:dkey-151g10.6
wsb1
rps27.2
pno1
tagln2
cpa2
atp6ap1a
CR293511.2
BX248418.1
dnase1
tbata
BX005361.2
fus
zfr2
BX664716.2
kmt2ba
styk1b
CU929115.1
ambra1b
pcdh1g31
gmeb1
vps39
zgc:174938
klf4
med31
ttc6
BX571715.1
chd4b
yrk
ccnl1a
zgc:162025
ier5
ncoa4
CABZ01078607.1
tbc1d10aa
ahctf1
eif4ebp3l
zgc:112234
myd88
fubp1
gadd45bb
syne2b
cgnl1
vaspb
atf4b
MCMDC2
aldob
lurap1
rpl35a
si:dkey-277m11.2
capn2b
CU660013.4
BX248418.2
plcd3a
dennd3a
raver1
rpl17
AL808129.1
cdkn1bb
scaper
si:ch211-276i12.9
klhl32
nf1a
rpl24
ep300a
sumo2b
eef1da
akap1b
cx32.3
vegfaa
rpl19
si:dkey-184a18.5
tmtc1
rpl37
RAPGEF2
st3gal1l
gck
smurf1
arl11
smad9
slc12a4
rpl32
mak16
BX005392.1
znf1155
intu
si:ch73-340n8.4
fam126a
agap1
jhy
CU457778.9
tasor2
si:ch211-232b12.5
cpeb4b
C1H3orf70
kazald2
ccser2a
BX004857.1
si:ch211-132b12.2
CR759918.1
rpl29
rgs8
si:dkey-6e2.2
fam219b
mylz3
pimr176
ptpdc1a
nuak1b
zgc:174354
slc20a2
castor1
pon2
kif26aa
ehbp1
tnrc6c1
rab11fip4b
znf706
prnprs3
morc2
abitram
si:dkey-31g6.6
fnbp4
trim8a
ostf1
psmg3
si:dkeyp-115e12.7
her9
polr2k
hopx
zgc:113298
eif3m
tmem126a
rpl27
il17rc
si:ch211-288d18.1
ldlra
si:ch211-207i20.3
nav2a
rasgrp4
tmf1
cgnb
si:dkey-217d24.6
mtg1
rps9
pim3
dre-mir-21-1
cib2
cox6a2
FP325130.1
bcl2l10
micall2a
stard7
sdk1a
usf2
myo1b
spen
zgc:152670
phf2
fgf21
foxa1
rps26l
dph3
prlra
axin2
SMIM10
tsr2
CU570889.1
ncoa2
si:cabz01102082.1
hace1
stag1b
rrn3
spink4
kank1a
btg3
BX908792.1
rps17
unk
gfra4a
BX088709.1
CT583625.5
CU695215.2
rgmd
glsb
cpe
dnajb1b
esyt2a
si:dkey-152b24.8
CR388168.2
cox7a2l
si:dkey-181m19.17
CT990618.1
scaf4a
lpin1
gchfr
cdca4
sertad2b
khnyn
brd8
parietopsin
ubb
ddx54
rps27a
zdhhc9
arl8
ttpa
prickle1b
kdm3b
kif16ba
ndst1b
CU207301.1
si:ch211-129o18.4
meaf6
akap13
ten1
ube2z
dgkza
im:6904045
slc2a3a
bco2l
kcnip3b
gabpb2a
rreb1a
BX294379.1
chgb
arhgef18a
lim2.5
FP101882.1
cyth4a
cldn23b
stambpl1
mycn
b2ml
s100v2
chd9
zgc:112234
CR394535.1
fam167b
CR847530.2
pnrc2
CR356222.1
c8a
CR382370.2
ncoa3
rnf165a
si:dkeyp-69b9.6
rps23
BX248324.1
tcf7l2
mafb
spsb3a
ros1
si:dkey-286h2.3
CR356233.1
utrn
si:ch73-376l24.3
dao.1
CT583672.1
nf2b
slit3
pcsk2
bco2a
rn7sk
znf526
CR352342.1
uncx
sh2d5
klhl15
brd2a
serf2
NC_002333.4
C9H2orf76
npas4a
si:dkey-262g12.14
si:ch73-44m9.1
amotl2a
lonrf1
pdcd2l
pink1
kcnc1a
chd2
coa8
NC_002333.1
map7d1a
wnk1b
ftr36
si:rp71-62i8.1
pxk
flot1a
si:dkey-190l8.2
hsph1
FOXK2
ewsr1a
rbl2
arhgap10
rpe65b
ankrd9
taok1a
mios
schip1
rpl23a
itga6b
wdtc1
ppardb
ncf2
afap1l1b
faua
ank3b
CABZ01076275.1
fthl27
tomm5
si:ch1073-291c23.2
CU861903.1
pcolce2a
zgc:163040
wdr59
tgm1l1
amer1
txnipb
mcl1a
NC_002333.21
CU633762.1
khsrp
erf
BX005129.3
CABZ01068842.1
cxcr4a
CR931782.1
and1
BX629344.1
ier3ip1
reps1
pcdh1a6
cfap161
dock11
zgc:174357
ier5l
setd2
uck2b
zgc:153896
rpl18
usp36
ino80db
glulb
pla1a
pskh1
lyrm4
grin3bb
CR848667.1
si:dkey-82i20.2
rabep2
ddx21
kidins220b
tspy
arid1aa
vdac3
fmnl1a
larp4ab
strip2
tbr1b
fosab
syne3
arhgef12a
trim3b
LO018124.1
clstn1
slc2a11b
spred1
clk2a
BX927336.3
rps14
tp63
h1-0
scdb
si:ch73-335l21.4
si:dkey-225k4.1
nek1
hk1
rmdn1
ciita
sos2
BX936308.2
akap8l
tsc1a
si:dkey-112a7.4
per3
polr1a
cox7a1
BX571811.1
nipbla
emp2
ltb4r
BX470116.1
cnot6b
chac1
vash2
si:ch73-71c20.5
BX324164.3
BX005129.2
rictora
gpr27
pde4ba
angel1
tshz1
srsf6b
fermt3b
snrnp70
si:ch211-215d8.2
si:ch211-240l19.7
yy1b
nkx3-2
plcg1
si:ch1073-314i13.4
cldnc
larp1b
CR847936.6
rbm26
pcdh10a
eevs
gcnt4a
rps20
msrb1b
phykpl
pbx1a
nup98
ptdss2
mafaa
acsl1b
nos1apa
ncor2
pcm1
mrpl42
ncl
lzic
si:dkey-229b18.3
usf3
ptmaa
fli1a
armc10
tirap
pclob
cmc4
zgc:112163
kat5a
tmem30c
irf2bpl
slc1a1
dap1b
chn1
srfbp1
sprtn
GFUS
tbc1d10b
BX511227.2
CR352226.1
gpr137bb
DHX35
si:ch1073-224n8.1
sept9a
zrsr2
