# Supplementary material for: Negative cell cycle regulation by calcineurin is necessary for proper beta cell regeneration in zebrafish
Source: eLife. 2024 Oct 9;12:RP88813. doi: 10.7554/eLife.88813 (PMC11464004; doi:10.7554/eLife.88813)
Supplement: Supplementary file 2. [file elife-88813-supp2.xlsx]

## Sheet: KEGG UP
geneSet	description	enrichmentRatio	pValue	FDR	userId
dre03030	DNA replication	6.75478	2.22045e-15	3.59712e-13	pole;mcm6;mcm5;mcm2;pola2;rpa2;mcm7;prim1;mcm4;prim2;fen1;mcm3;pole2;pold1;rnaseh2a;rpa1;lig1;rfc4;pcna;pola1;pold3;pold2;rpa3
dre04110	Cell cycle	3.37211	4.01679e-13	3.2536e-11	mcm6;mcm5;cdc45;mcm2;chek1;orc6;rbl1;plk1;ccne1;mcm7;ccna2;mcm4;espl1;cdk1;ttk;cdkn1a;mcm3;cdc20;pttg1;cdc7;orc4;ccnb1;e2f1;ccne2;tgfb3;ccnd2a;bub1;cdc6;cdk2;pcna;ccnb2;mad2l1;orc5;orc1;rb1;anapc2;ccnb3;cdc25b;e2f3;chek2;si:ch211-160f23.5;orc2
dre01100	Metabolic pathways	1.44925	7.62041e-09	4.11502e-07	rrm2;atp5mea;pole;zgc:110540;zgc:77118;gnsb;dctd;tyms;tk1;pola2;xylb;galca;aldh4a1;dck;galk1;naga;atp6v1c1b;prim1;ext1c;hexb;prim2;haao;ckmt1;tm7sf2;acer2;ggctb;b4galt4;gla;rrm1;elovl5;pole2;si:dkey-40g16.6;ftcd;ext1b;ampd2a;cmpk2;acy1;pgm3;eno1b;aldh3a2b;csad;ppap2d;zgc:101040;rpn2;stt3a;dhcr7;ggt1b;mpi;lta4h;asl;aldh5a1;sptlc2a;pold1;zmp:0000001048;hmgcs1;hyal2a;zgc:152830;tecrb;atp6v1h;chdh;ug…
dre03440	Homologous recombination	4.46403	1.13569e-07	4.59956e-06	rad51;rpa2;nbn;mus81;eme1;rad51b;pold1;rad54l;rpa1;pold3;rad54b;brip1;rad51c;pold2;rad52;rpa3
dre04142	Lysosome	2.52248	3.89896e-07	1.26326e-05	zgc:77118;gnsb;galca;arsa;naga;hexb;neu1;ctsba;gla;lgmn;si:ch211-122f10.4;ctsh;ctss2.1;atp6v1h;tpp1;acp2;galns;glb1;ctsd;ctso;ap1g1;slc17a5;naglu;ap3b1a;galcb;igf2r;ap3d1;mcoln1b;clta;ctsz;cln5;psap;ctsla
dre03430	Mismatch repair	5.58004	7.62949e-07	2.05996e-05	rpa2;exo1;pold1;rpa1;lig1;rfc4;pcna;pold3;msh2;pold2;rpa3
dre00240	Pyrimidine metabolism	2.55087	1.257e-05	0.000270325	rrm2;pole;zgc:110540;dctd;tyms;tk1;pola2;dck;prim1;prim2;rrm1;pole2;cmpk2;pold1;dut;dtymk;pola1;umps;pold3;nt5c2b;nt5c1bb;entpd6;pold2;ak9
dre00100	Steroid biosynthesis	5.28635	1.4177e-05	0.000270325	tm7sf2;dhcr7;hsd17b7;cyp51;sc5d;nsdhl;dhcr24;lss;fdft1
dre00280	Valine, leucine and isoleucine degradation	3.24657	1.5018e-05	0.000270325	si:dkey-40g16.6;aldh3a2b;hmgcs1;aldh2.2;acads;acaa2;aldh7a1;aox6;pccb;bckdhb;mccc1;si:ch211-198n5.11;acat2;hadhab;dbt;hibch
dre03420	Nucleotide excision repair	3.29729	7.96187e-05	0.00128982	pole;rpa2;pole2;cul4a;pold1;rpa1;lig1;rfc4;pcna;pold3;pold2;gtf2h4;rpa3
dre04218	Cellular senescence	1.92001	0.000208651	0.00283221	chek1;rbl1;hipk2;ccne1;ccna2;hipk1a;nbn;cdk1;cdkn1a;mybl2b;nfatc3b;ccnb1;e2f1;ccne2;tgfb3;ccnd2a;mapk1;foxm1;cdk2;zfp36l1a;ccnb2;ppp3ccb;itpr2;mcu;rb1;ccnb3;rela;e2f3;calm3b;chek2;si:ch211-160f23.5;mapk13
dre04114	Oocyte meiosis	2.0875	0.000209793	0.00283221	plk1;ccne1;espl1;cdk1;cdc20;pttg1;ccnb1;ccne2;mapk1;bub1;ar;cdk2;igf1ra;ccnb2;sgo1;fbxo5;aurka;mad2l1;adcy9;ppp3ccb;itpr2;anapc2;adcy2b;calm3b;ppp2r5ca;cpeb3
dre03410	Base excision repair	3.31786	0.000265538	0.00330901	pole;fen1;pole2;pold1;lig1;pcna;neil3;pold3;pold2;unga;zgc:110224
dre03460	Fanconi anemia pathway	2.84473	0.000406651	0.00470553	rad51;rpa2;fanci;ube2t;mus81;eme1;rpa1;brip1;rad51c;fan1;fancc;fancd2;rpa3
dre04914	Progesterone-mediated oocyte maturation	2.06668	0.00125868	0.0135938	plk1;ccna2;cdk1;ccnb1;gnai3;mapk1;bub1;cdk2;igf1ra;ccnb2;aurka;mad2l1;kif22;adcy9;anapc2;ccnb3;adcy2b;cdc25b;mapk13;cpeb3
dre00052	Galactose metabolism	3.04366	0.00188957	0.018793	galk1;gla;ugp2a;glb1;pgm2;galt;b4galt1;pgm1;pfklb
dre00071	Fatty acid degradation	2.66871	0.00197211	0.018793	aldh3a2b;aldh2.2;acads;acaa2;aldh7a1;eci2;cpt2;acat2;hadhab;acadvl;acadl
dre00531	Glycosaminoglycan degradation	3.55093	0.00230197	0.0198312	gnsb;hexb;hyal2a;galns;glb1;naglu;hyal1
dre00230	Purine metabolism	1.70817	0.00232588	0.0198312	rrm2;pole;zgc:110540;pola2;dck;prim1;prim2;gucy1b1;rrm1;pole2;ampd2a;pold1;ampd3b;pde1a;pola1;pgm2;pold3;nt5c2b;nt5c1bb;enpp4;adcy9;gart;pde8a;entpd6;pold2;pde5ab;pgm1;adcy2b;ak9;pde3a
dre04115	p53 signaling pathway	2.119	0.00385823	0.0312517	rrm2;chek1;ccne1;cdk1;gtse1;cdkn1a;ccnb1;ccne2;ccnd2a;cdk2;fas;ccnb2;aifm2;pidd1;chek2
dre03450	Non-homologous end-joining	3.98574	0.00572556	0.0441686	fen1;xrcc5;polm;xrcc6;xrcc4

## Sheet: KEGG DOWN
geneSet	description	enrichmentRatio	pValue	FDR	userId
dre03010	Ribosome	6.56141	0	0	rsl24d1;rplp2;rpl22;rpl13a;rps11;rpl30;rpl36;rpl34;rps27.1;rpl14;rps21;rps26;rps28;rpl36a;uba52;rps18;rpl31;rps16;rpl10;rpl12;rpl38;rpl5b;rps24;rps29;rps15a;zgc:171772;rpl21;rpl35;mrpl32;rps19;rpl39;rps27.2;rpl35a;rpl17;rpl24;rpl19;rpl37;rpl32;rpl29;rpl27;rps9;rps26l;rps17;rps27a;rps23;rpl23a;faua;rpl18;rps14;rps20
dre04216	Ferroptosis	3.90768	0.000165231	0.0133837	gpx4a;acsl4b;acsl3b;sat1a.2;sat1a.1;acsl4a;ncoa4;fthl27;vdac3;acsl1b
dre04330	Notch signaling pathway	2.88272	0.00207462	0.11203	dlc;ep300b;numb;her6;maml1;dtx2;jag2b;ep300a;her9;ncor2

## Sheet: BP UP
geneSet	description	enrichmentRatio	pValue	FDR	userId
GO:0022402	cell cycle process	3.09363	0	0	dscc1;zwilch;kif20a;cdc45;prc1a;dsn1;cep55l;ndc80;rad51;chek1;rpa2;dtl;cenph;esco2;ccne1;ncaph2;ncaph;haus1;si:dkey-170l10.1;cdt1;kif23;nsl1;tpx2;top2a;espl1;nbn;mus81;mnd1;e2f8;cdk1;ttk;fen1;exo1;eme1;pttg1;spdl1;cdca8;trip13;nuf2;ect2;chmp1a;ncapg;cdca5;kifc1;aspm;bub1;tacc3;kif11;bub1ba;cdk2;nusap1;anln;mad2l1bp;pla2g4aa;pola1;ensaa;fbxo5;si:ch211-161h7.4;bora;haus6;fam83d;cenpe;cdc25b;psme2;m…
GO:0006259	DNA metabolic process	3.05392	0	0	rrm2;dscc1;pole;cdc45;mcm2;pola2;gins4;rad51;orc6;rpa2;wdhd1;dtl;esco2;emsy;cdt1;mcm4;fanci;ube2t;top2a;nbn;mus81;mnd1;prim2;e2f8;fen1;mcm10;primpol;ssrp1b;exo1;mcm3;tonsl;eme1;cdc7;etaa1;orc4;swi5;tdp2b;trip13;zswim7;chaf1a;gins2;dbf4b;cdca5;rpa1;si:ch1073-296i8.2;dnmt1;uhrf1;pcna;pola1;tinf2;si:ch1073-385f13.3;orc5;ap5s1;swsap1;dclre1a;actr2b;pot1;fan1;mms22l;tet1;xrcc5;stn1;rad52;fancd2;ndfip1…
GO:0007059	chromosome segregation	4.46675	1.33227e-15	1.26121e-13	dscc1;dsn1;ndc80;cenph;esco2;ccne1;ncaph2;ncaph;cdt1;kif23;nsl1;top2a;espl1;mus81;ttk;fen1;eme1;pttg1;spdl1;cdca8;cenpn;trip13;nuf2;chmp1a;ncapg;cdca5;bub1;bub1ba;spc25;nusap1;ska1;si:ch211-161h7.4;fam83d;cenpe;phf13;si:dkey-57a22.11;knstrn
GO:0000278	mitotic cell cycle	2.95596	2.33147e-15	1.65534e-13	chaf1b;dscc1;pbk;zwilch;pole;kif20a;cdc45;dsn1;cep55l;ndc80;rad51;chek1;wdhd1;dtl;cenph;esco2;ccne1;ncaph2;ncaph;cdt1;kif23;nsl1;tpx2;top2a;nbn;mus81;e2f8;cdk1;ttk;eme1;pttg1;spdl1;cdca8;cks1b;nuf2;chmp1a;ncapg;cdca5;kifc1;aspm;bub1;tacc3;kif11;bub1ba;cdk2;nusap1;anln;mad2l1bp;pla2g4aa;pola1;ska1;ensaa;fbxo5;si:ch211-161h7.4;bora;cenpe;cdc25b;cks2;psme2;phf13;psme1;wtip
GO:0048285	organelle fission	3.63967	4.35429e-13	2.47324e-11	dscc1;dsn1;ndc80;rad51;rpa2;ccne1;ncaph2;ncaph;cdt1;kif23;nsl1;top2a;espl1;mus81;mnd1;ttk;eme1;pttg1;spdl1;cdca8;mxe;mtfr2;trip13;nuf2;chmp1a;ncapg;cdca5;kifc1;bub1;kif11;bub1ba;nusap1;mad2l1bp;fbxo5;si:ch211-161h7.4;bora;cenpe;phf13;si:dkey-57a22.11
GO:0051276	chromosome organization	2.23031	7.15905e-11	3.38862e-09	dscc1;cdc45;dsn1;mcm2;ndc80;gins4;rad51;loxl2a;rpa2;cenph;cenpi;esco2;ccne1;emsy;asf1ba;ncaph2;ncaph;si:ch211-113a14.22;cdt1;si:dkey-148h10.5;kif23;ing5a;mcm4;nsl1;top2a;nbn;smc2;fen1;hist1h2a1;pttg1;spdl1;cdca8;cenpn;trip13;rerea;nuf2;chaf1a;gins2;chmp1a;ncapg;cdca5;rpa1;bub1;meis3;dnmt1;bub1ba;hist1h2a10;nusap1;uhrf1;nasp;nsd2;tinf2;fbxo5;suv39h1a;si:ch211-161h7.4;dclre1a;pot1;prdm5;xrcc5;ash2l…
GO:0051301	cell division	2.84968	1.60072e-08	6.49434e-07	zwilch;kif20a;cdc45;prc1a;dsn1;cep55l;ndc80;ccne1;ncaph;cdt1;kif23;e2f8;cdk1;ttk;spdl1;cdca8;spc24;cks1b;nuf2;ect2;tgfb3;chmp1a;si:ch211-244o22.2;nusap1;ercc6l;anln;ska1;ensaa;fbxo5;bora;haus6;fam83d;cks2;cdk20
GO:0051726	regulation of cell cycle	2.35527	2.86622e-08	1.01751e-06	zwilch;cdc45;prc1a;ndc80;chek1;rpa2;dtl;ccne1;cdt1;tpx2;top2a;nbn;mus81;e2f8;cdk1;ttk;fen1;rnf167;eme1;pttg1;etaa1;spdl1;cks1b;trip13;ect2;cdca5;tfdp1b;bub1;kif11;bub1ba;cdk2;si:ch73-352p4.5;mad2l1bp;pla2g4aa;phactr4b;fbxo5;bora;cdc25b;e2f3;cks2;psme2;mdm1;cdk20;si:ch211-160f23.5;knstrn;psme1
GO:0000003	reproduction	2.52145	8.20763e-07	2.58996e-05	rad51;rpa2;ccne1;ncaph2;top2a;espl1;nbn;mus81;mnd1;ttk;exo1;eme1;pttg1;trip13;gnrh3;dmrt1;nuf2;numa1;ggt1b;rpa1;bub1;ar;pvrl2l;bub1ba;pla2g4aa;fbxo5;si:ch211-161h7.4;tdrd7b;cdc25b;pde3a;si:dkey-57a22.11;paqr7b
GO:0033554	cellular response to stress	1.77253	8.56441e-06	0.000231743	pole;cdc45;gins4;rad51;chek1;rpa2;wdhd1;dtl;map3k2;emsy;fanci;ube2t;nbn;mus81;fen1;mcm10;primpol;ssrp1b;exo1;tonsl;eme1;cdc7;etaa1;cul4a;swi5;tdp2b;trip13;zswim7;scap;tnc;chaf1a;gins2;cdca5;rpa1;si:ch73-352p4.5;pcna;pola1;pdia4;uba7;ube4a;ap5s1;swsap1;dclre1a;actr2b;fan1;mms22l;pigp;xrcc5;brat1;rad52;pkd2;bmt2;fancd2;man1b1b;ube2b;armt1;sdf2l1;xrcc6;zranb3
GO:0007017	microtubule-based process	2.02824	8.97597e-06	0.000231743	kif20a;prc1a;ndc80;kif2c;cenph;haus1;si:dkey-170l10.1;kif23;tpx2;mak;spdl1;kif20bb;nuf2;kifc1;aspm;tacc3;kif11;nusap1;atat1;ska1;rhot2;si:ch73-281i18.7;aftphb;dnah2;kif14;poc1b;kif22;bora;haus6;ap3d1;kif20ba;ippk;cenpe;ak9;ift74;stmn2b;mdm1;tbcd;knstrn;wtip;cep152
GO:1901565	organonitrogen compound catabolic process	1.52071	0.0018766	0.0428992	galca;aldh4a1;dtl;naga;neu1;ctsba;haao;rnf167;cdc20;gla;si:dkey-40g16.6;cul4a;nploc4;ankib1b;ggt1b;aldh5a1;si:ch211-122f10.4;ctss2.1;ube2r2;zgc:110239;psmd3;uhrf1;dcaf11;prodha;clpxb;ggact.2;psma6l;gcat;ctso;aox6;ube4a;fbxl16;arih1;tet1;anapc2;ggact.3;bace2;ddah2;ndfip1l;psmc5;psme2;man1b1b;si:ch211-284e13.9;ube2b;usp2b;sdf2l1;psme1;psma8;hibch
GO:0051128	regulation of cellular component organization	1.47701	0.0019637	0.0428992	cdc45;mcm2;ndc80;arhgap17a;ccne1;tmod4;tpx2;fen1;doc2b;rnd1b;pttg1;add1;spdl1;grk5l;rac3a;trip13;capzb;rerea;tnc;ect2;gsnb;cdca5;bub1;meis3;sema3b;bub1ba;atat1;mad2l1bp;ska1;rhot2;stat3;arpc1b;ssh2b;fbxo5;crim1;slc44a4;actr2b;pot1;bora;cdc42ep1a;clstn2;stn1;preb;stmn2b;psmc5;mdm1;extl3;tmod1;si:dkey-49n23.1;plxna3;bves;plxnb2a;rhoua;wtip;rtn4ip1
GO:0005975	carbohydrate metabolic process	1.75451	0.00239421	0.0485682	klb;b3gnt2l;naga;hexb;neu1;b4galt4;gla;eno1b;galk2;mpi;hyal2a;amdhd2;ugp2a;pygb;pgm2;galt;pgls;pfkfb2a;man2b2;pask;hs2st1b;chid1;ippk;adpgk2;adpgk;man2a1;pfklb;pgam1a

## Sheet: BP DOWN
geneSet	description	enrichmentRatio	pValue	FDR	userId
GO:0043603	cellular amide metabolic process	2.40556	6.59612e-11	1.8733e-08	rsl24d1;eef2a.1;ngdn;rplp2;rpp30;eif4a2;rps11;rpl30;rpl36;rpl34;rps27.1;rbm24a;rps21;rps26;eef2l2;rps28;rpl36a;uba52;cpda;rps18;rpl31;rps16;si:dkey-46g23.1;rpl10;rpl38;nanos1;rpl5b;rps24;rps29;rps15a;eif1ad;zgc:171772;qkia;rpl21;rpl35;mrpl32;rpl39;neu3.3;rps27.2;eif4ebp3l;rpl35a;rpl17;rpl24;rpl19;rpl32;rpl29;tnrc6c1;eif3m;rpl27;rps9;dph3;rps17;unk;cpe;rps27a;rps23;faua;rpl18;rps14;nipbla;chac1
GO:0022613	ribonucleoprotein complex biogenesis	2.27044	2.54018e-05	0.00360706	rsl24d1;rsl1d1;ngdn;sdad1;rps27.1;rps21;nip7;rps28;c1d;znhit3;rps16;rpl10;znf593;dicer1;rpl5b;rexo4;polr1d;rpl35;sf3b1;fam207a;clp1;utp3;rps27.2;rpl35a;rpl24;eif3m;rps14;ncl;srfbp1
GO:0010629	negative regulation of gene expression	1.69335	0.000362018	0.034271	her11;nfil3-5;zbtb16b;jund;pcgf1;foxo4;rxrbb;hnrnpm;cry3a;cux1a;zgc:122979;rbm24a;foxo1a;hnrnpa0a;si:dkey-46g23.1;thraa;nrde2;foxk2;nanos1;dicer1;thrb;irf2bp1;smg7;qkia;per1a;clp1;edc4;eif4ebp3l;smad9;si:ch211-232b12.5;tnrc6c1;her9;phf2;unk;pnrc2;rbl2;ppardb;erf;chac1;tshz1;yy1b;ncor2;ncl;kat5a
GO:0010608	posttranscriptional regulation of gene expression	2.28162	0.000586054	0.037196	ngdn;hnrnpm;rbm24a;hnrnpa0a;si:dkey-46g23.1;rpl10;nrde2;nanos1;dicer1;smg7;qkia;rc3h1b;clp1;eif4ebp3l;tnrc6c1;rps9;dph3;unk;ncl
GO:0002520	immune system development	1.80498	0.00065486	0.037196	pglyrp6;camk4;fgfr4;dlc;mycb;cecr2;ccl25a;naca;slc25a38a;rps27.1;tet3;mfn2;rps24;rps29;rpl35;sf3b1;sh3rf1;kif1b;ncoa4;myd88;rpl35a;sumo2b;vegfaa;rpl19;smad9;rpl27;ncoa2;brd2a;rps14;snrnp70;pbx1a;ncor2;kat5a

## Sheet: CC UP 
geneSet	description	enrichmentRatio	pValue	FDR	userId
GO:0005694	chromosome	2.83713	0	0	dscc1;zwilch;pole;cdc45;dsn1;pola2;ndc80;gins4;rad51;loxl2a;orc6;rpa2;wdhd1;dtl;cenph;cenpi;esco2;ncaph2;ncaph;si:ch211-113a14.22;cdt1;nsl1;nbn;smc2;prim2;si:dkey-6i22.5;hist1h2a1;mcm10;ssrp1b;tonsl;eme1;etaa1;spdl1;orc4;cdca8;spc24;swi5;trip13;nuf2;gins2;ncapg;cdca5;rpa1;bub1;bub1ba;spc25;hist1h2a10;ercc6l;uhrf1;pola1;tinf2;ska1;suv39h1a;si:ch211-161h7.4;orc5;dclre1a;actr2b;pot1;mms22l;mbd6;xrcc…
GO:0005773	vacuole	2.46961	7.61475e-06	0.000228443	gnsb;galca;atp6v1c1b;neu1;ctsba;tp53inp1;slc38a9;tmem175;ctss2.1;pip4p2;atp6v1h;zgc:110239;tmem150c;rab7b;wdr24;ctso;lamtor1;march2;man2b2;tpcn2;zgc:55413;chid1;mcoln1b;arl8bb;cln5;slc37a4b;psap
GO:0032993	protein-DNA complex	3.0942	3.45247e-05	0.000690494	cdc45;pola2;gins4;rpa2;si:ch211-113a14.22;prim2;hist1h2a1;tonsl;gins2;rpa1;hist1h2a10;pola1;tinf2;pot1;stn1;hist1h2a5
GO:0015630	microtubule cytoskeleton	1.79619	0.000123332	0.00184998	kif20a;dsn1;cep55l;kif2c;dtl;ccne1;haus1;si:dkey-170l10.1;kif23;tpx2;espl1;cdk1;cep19;spdl1;cdca8;kif20bb;si:dkey-185e18.7;numa1;kifc1;kif11;nusap1;atat1;ska1;si:ch73-281i18.7;fbxo5;dnah2;kif14;poc1b;kif22;specc1lb;haus6;fam83d;kif20ba;dnm2a;ippk;cenpe;ift74;mdm1;cep78;wtip;cep152
GO:0044430	cytoskeletal part	1.55145	0.000751754	0.00902105	zgc:92380;kif20a;dsn1;cep55l;kif2c;dtl;ccne1;haus1;si:dkey-170l10.1;kif23;tmod4;tpx2;espl1;cdk1;cep19;cap1;nefma;spdl1;cdca8;kif20bb;si:dkey-185e18.7;capzb;numa1;kifc1;kif11;nusap1;atat1;anln;ska1;arpc1b;fbxo5;dnah2;kif14;poc1b;kif22;specc1lb;actr2b;haus6;fam83d;kif20ba;myhz1.1;dnm2a;ippk;cenpe;ift74;mdm1;tmod1;cep78;bin2b;wtip;cep152

## Sheet: CC DOWN 
geneSet	description	enrichmentRatio	pValue	FDR	userId
GO:1990904	ribonucleoprotein complex	2.96662	0	0	rsl24d1;rsl1d1;ngdn;rplp2;rpp30;hnrnpm;sf3b6;rps11;rpl30;nsa2;rpl36;rpl34;rps27.1;rbm24a;rps21;rps26;nip7;rps28;rpl36a;uba52;rps18;znhit3;rpl31;hnrnpa0a;rps16;si:dkey-46g23.1;rpl10;znf593;rpl38;dicer1;rpl5b;rps24;rps29;utp23;rps15a;zgc:171772;smg7;rpl21;rpl35;mrpl32;sf3b1;fam207a;rpl39;utp3;edc4;rps27.2;rpl35a;rpl17;rpl24;rpl19;rpl32;rpl29;tnrc6c1;eif3m;rpl27;rps9;rps17;unk;rps27a;pnrc2;rps23;fau…
GO:0044445	cytosolic part	4.83034	1.77636e-15	5.32907e-14	rsl24d1;rps11;rpl30;rpl36;rps27.1;rps21;rps26;rps28;rpl36a;uba52;rpl31;rps16;rpl10;rpl38;rpl5b;rps29;rps15a;rpl21;rpl35;rpl39;rps27.2;rpl35a;rpl17;rpl24;rpl19;rpl32;rpl29;rpl27;rps9;rps27a;rps23;rpl18;rps14;tsc1a
GO:0005730	nucleolus	2.01572	0.0024387	0.048774	rsl24d1;ngdn;sdad1;rpp30;midn;jmjd6;ypel3;nip7;c1d;polr1d;utp23;fam207a;utp3;pno1;polr2k;phf2;ddx54;meaf6;polr1a
